# Supplementary material for: Using COVID-19 Pandemic as a Prism: A Systematic Review of Methodological Approaches and the Quality of Empirical Studies on Physical Activity Behavior Change
Source: Front Sports Act Living. 2022 Apr 21;4:864468. doi: 10.3389/fspor.2022.864468 (PMC9069113; doi:10.3389/fspor.2022.864468)
Supplement: Supplementary file 2 [file Table_2.XLSX]

## Sheet: appendix_df
Article_id	Title	Abstract	Journal	Publication_date	DOI	First_author_nationality	Sampling_country	Sample_size_N	Sample_mean_age	Sampling_start_date	Sampling_end_date	Mean_containment_health_index_during_sampling	Days_from_containment_high_to_sampling	Measurement_design_a	Measurement_design_b	Measurement_type	Target_group	Target_group_age	Sampling_type	PA_questionnaire_name	Sampling_before_during_after_highest_containment_occured	Quality_study_aim	Quality_participants	Quality_outcomes	Quality_methods	Quality_statistics
Pépin 2020	Wearable Activity Trackers for Monitoring Adherence to Home Confinement During the COVID-19 Pandemic Worldwide: Data Aggregation and Analysis.	BACKGROUND: In the context of home confinement during the coronavirus disease (COVID-19) pandemic, objective, real-time data are needed to assess populations' adherence to home confinement to adapt policies and control measures accordingly. OBJECTIVE: The aim of this study was to determine whether wearable activity trackers could provide information regarding users' adherence to home confinement …	Journal of Medical Internet Research	2020-06-19	https://doi.org/10.2196/19787	France	Multinational	742000		2020-01-13	2020-04-13			before and during	before and during the pandemic (within-subject)	objective measures	general population	adults	defined sample			sufficient with concerns	sufficient with concerns	yes	sufficient with concerns	no
Tison 2020	Worldwide Effect of COVID-19 on Physical Activity: A Descriptive Study.		Annals of Internal Medicine	2020-11-03	https://doi.org/10.7326/M20-2665	USA	Multinational	455404		2020-02-11	2020-06-01			before and during	before and during the pandemic (within-subject)	objective measures	general population	adults	defined sample			yes	yes	yes	yes	yes
To 2021	Impact of COVID-19 on Physical Activity Among 10,000 Steps Members and Engagement With the Program in Australia: Prospective Study.	BACKGROUND: Physical activity is an important health behavior, due to its association with many physical and mental health conditions. During distressing events, such as the COVID-19 pandemic, there is a concern that physical activity levels may be negatively impacted. However, recent studies have shown inconsistent results. Additionally, there is a lack of studies in Australia on this topic. OBJ…	Journal of Medical Internet Research	2021-01-25	https://doi.org/10.2196/23946	Australia	Australia	60560		2020-03-02	2020-06-30	53.33	30	before and during	before and during the pandemic (within-subject)	objective measures	general population	adults	defined sample			yes	sufficient with concerns	yes	yes	yes
Donato 2021	The Limitations of Social Behaviour Imposed by CoVid-19 Impacted the Perception and the Evolution of Peripheral Arterial Disease Negatively	The novel acute respiratory syndrome coronavirus 2 (SARS-CoV-2) pandemic imposed a national lockdown at the beginning of 2020. People faced social distancing, being forced to stay at home. Peripheral arterial disease (PAD) typically influences life habits and psycho-social relationship. It is now questionable how PAD can be affected by changes in lifestyle imposed by the Sars-CoV-19 Pandemic. The…	Annals of Vascular Surgery	2021-03-05	https://doi.org/10.1016/j.avsg.2021.02.003	Italy	Italy	102	75.1	2020-07-01	2020-09-01	56.98	152	only during	during the pandemic and recollect before (within-subject)	self-report	patients	adults	convenience sample		after	yes	yes	yes	sufficient with concerns	sufficient with concerns
Jia 2020	Impact of COVID-19 lockdown on activity patterns and weight status among youths in China: the COVID-19 Impact on Lifestyle Change Survey (COINLICS)	Lockdown measures including school closures due to COVID-19 may affect youths' activity patterns and obesity status. This will be for the first time examined in China in this study on the basis of a large national sample from the COVID-19 Impact on Lifestyle Change Survey (COINLICS). Through an online questionnaire, 10,082 participants from high schools, colleges, and graduate schools, aged 19.8 …	International Journal of Obesity	2020-12-04	https://doi.org/10.1038/s41366-020-00710-4	China	China	10082	19.8	2020-04-08	2020-05-08	58.65	77	only during	during the pandemic and recollect before (within-subject)	self-report	general population	children	convenience sample	International Physical Activity Questionnaire	before	yes	yes	yes	yes	sufficient with concerns
DeJong 2021	Running behaviors, motivations, and injury risk during the COVID-19 pandemic: A survey of 1147 runners.	The COVID-19 pandemic has influenced activity behaviors worldwide. Given the accessibility of running as exercise, gaining information on running behaviors, motivations, and running-related injury (RRI) risk during the pandemic is warranted. The purpose of this study was to assess the influence of the COVID-19 pandemic on running volume, behaviors, motives, and RRI changes from the year prior to …	PloS one	2021-02-12	https://doi.org/10.1371/journal.pone.0246300	USA	USA	1147	35	2020-05-04	2020-06-04	66.67	60	only during	during the pandemic and recollect before (within-subject)	self-report	athletes/exercisers	adults	convenience sample		after	yes	yes	yes	yes	yes
Tulchin-Francis 2021	The impact of the coronavirus disease 2019 pandemic on physical activity in U.S. children		Journal of Sport and Health Science	2021-02-28	https://doi.org/10.1016/j.jshs.2021.02.005	USA	USA	1324		2020-04-04	2020-06-27	66.23	30	only during	during the pandemic and recollect before (within-subject)	self-report	general population	children	convenience sample	Godin-Shephard Leisure-Time Physical Activity Questionnaire	during	yes	sufficient with concerns	yes	yes	yes
Moore 2020	Impact of the COVID-19 virus outbreak on movement and play behaviours of Canadian children and youth: a national survey.	BACKGROUND: Healthy childhood development is fostered through sufficient physical activity (PA; including time outdoors), limiting sedentary behaviours (SB), and adequate sleep; collectively known as movement behaviours. Though the COVID-19 virus outbreak has changed the daily lives of children and youth, it is unknown to what extent related restrictions may compromise the ability to play and mee…	The International Journal of Behavioral Nutrition and Physical Activity	2020-07-06	https://doi.org/10.1186/s12966-020-00987-8	Canada	Canada	1472	11.68					only during	during the pandemic: less or more	self-report	general population	children	representative			yes	yes	yes	yes	yes
Visser 2020	Self-Reported Impact of the COVID-19 Pandemic on Nutrition and Physical Activity Behaviour in Dutch Older Adults Living Independently.	The aim was to explore the self-reported impact of the COVID-19 pandemic on nutrition and physical activity behaviour in Dutch older adults and to identify subgroups most susceptible to this impact. Participants (N = 1119, aged 62-98 y, 52.8% female) of the Longitudinal Aging Study Amsterdam living independently completed a COVID-19 questionnaire. Questions on diagnosis, quarantine and hospitaliz…	Nutrients	2020-11-30	https://doi.org/10.3390/nu12123708	Netherlands	Netherlands	1119	74	2020-03-01	2020-10-08	51.39	-9	only during	during the pandemic: less or more	self-report	general population	seniors	convenience sample	LASA Physical Activity Questionnaire	during	yes	yes	yes	yes	sufficient with concerns
García-Tascón 2020	The Impact of the COVID-19 Confinement on the Habits of PA Practice According to Gender (Male/Female): Spanish Case.	The declaration of the COVID-19 pandemic has resulted in drastic changes to life worldwide. In Spain, the state of alarm caused the confinement of 47 million inhabitants, affecting every aspect of life. This study analyzes the impact of such confinement on the health of men and women, as well as the effect on the practice of physical activity (PA) of both genders. An ad hoc questionnaire was admi…	International Journal of Environmental Research and Public Health	2020-09-23	https://doi.org/10.3390/ijerph17196961	Spain	Spain	1046	40	2020-04-10	2020-05-10	65.83	32	only during	during the pandemic and recollect before (within-subject)	self-report	general population	adults	convenience sample		before	yes	yes	yes	yes	yes
Zenic 2020	Levels and Changes of Physical Activity in Adolescents during the COVID-19 Pandemic: Contextualizing Urban vs. Rural Living Environment	Featured Application The study findings can be applied in the development of modalities and strategies aimed at the preservation of physical activity levels during crises similar to the COVID-19 pandemic. Abstract The COVID-19 pandemic and the social distancing implemented shortly after influence physical activity levels (PALs). The purpose of this investigation was to evaluate the changes in PAL…	Applied Sciences-Basel	2020-06-09	https://doi.org/10.3390/app10113997	Croatia	Croatia	823	16.5	2020-04-05	2020-04-10	79.49	26	before and during	before and during the pandemic (within-subject)	self-report	general population	children	convenience sample	Physical Activity Questionnaire	after	yes	sufficient with concerns	yes	yes	yes
Sekulic 2020	Prospective Analysis of Levels and Correlates of Physical Activity during COVID-19 Pandemic and Imposed Rules of Social Distancing; Gender Specific Study among Adolescents from Southern Croatia	Background: Due to the COVID-19 pandemic, global authorities have imposed rules of social distancing that directly influence overall physical activity in populations. The aim of this study was to evaluate the trends of changes in physical-activity levels (PALs) in adolescents and factors that may be associated with PALs among the studied boys and girls. Methods: Participants in this prospective s…	Sustainability	2020-05-15	https://doi.org/10.3390/su12104072	Croatia	Croatia	388	16.4	2020-04-05	2020-04-10	79.49	26	before and during	before and during the pandemic (within-subject)	self-report	general population	children	convenience sample	Physical Activity Questionnaire	after	yes	yes	yes	yes	yes
TenVelde 2021	Physical activity behaviour and screen time in Dutch children during the COVID-19 pandemic: Pre-, during- and post-school closures.	BACKGROUND: Measures during the COVID-19 pandemic, including the closure of schools and sports facilities, may have lasting impact on the physical activity (PA) of children that persists for a long time. OBJECTIVE: To investigate the effect of COVID-19 measures on screen time and PA in Dutch children pre-, during- and post-school closures. METHODS: In cohort A (n = 102, 10.5±3.6years, 42.4% boys)…	Pediatric Obesity	2021-02-23	https://doi.org/10.1111/ijpo.12779	Netherlands	Netherlands	102	10.5	2020-05-01	2020-05-31	56.33	52	only during	during the pandemic and recollect before (within-subject)	self-report	general population	children	convenience sample	BAECKE Questionnaire	after	yes	yes	yes	yes	sufficient with concerns
McCarthy 2021	Physical Activity Behavior Before, During, and After COVID-19 Restrictions: Longitudinal Smartphone-Tracking Study of Adults in the United Kingdom.	BACKGROUND: The COVID-19 pandemic led to the implementation of worldwide restrictive measures to reduce social contact and viral spread. These measures have been reported to have a negative effect on physical activity (PA). Studies of PA during the pandemic have primarily used self-reported data. The single academic study that used tracked data did not report on demographics. OBJECTIVE: This stud…	Journal of Medical Internet Research	2021-02-03	https://doi.org/10.2196/23701	UK	UK	5395	41.02	2020-01-22	2020-06-17	41.2	-56	before and during	before and during the pandemic (within-subject)	objective measures	general population	adults	defined sample			yes	yes	yes	yes	sufficient with concerns
Bourdas 2020	Evolution of changes in physical activity over lockdown time: Physical activity datasets of four independent adult sample groups corresponding to each of the last four of the six COVID-19 lockdown weeks in Greece	There is a worldwide interest in how lockdown affects physical activity (PA) during the COVID-19 pandemic. Although it has been shown that the mandated stay-at-home restrictions and self-isolation measures applied in different countries were accosiated with a reduction in physical exercise and activity, such results derive from studying only specific periods of lockdown. However, in order for thi…	Data in Brief	2020-09-11	https://doi.org/10.1016/j.dib.2020.106301	Greece	Greece	5206	38.07	2020-04-05	2020-05-03	63.33	27	only during	during the pandemic and recollect before (within-subject)	self-report	general population	adults	convenience sample	Active-Q Questionnaire	during	yes	sufficient with concerns	yes	yes	sufficient with concerns
Chouchou 2021	The importance of sleep and physical activity on well-being during COVID-19 lockdown: reunion island as a case study.	BACKGROUND: Lockdown has been one of the major worldwide strategies to control the spread of coronavirus disease 2019 (COVID-19). Its consequences on the well-being of individuals needs to be better understood. The objective of this work was to evaluate the impact of lockdown on the well-being of a general population and the factors associated with this potential impairment of well-being in a pop…	Sleep Medicine	2020-07-22	https://doi.org/10.1016/j.sleep.2020.09.014	France	France	400	29.8					only during	during the pandemic and recollect before (within-subject)	self-report	general population	adults	convenience sample	International Physical Activity Questionnaire		yes	sufficient with concerns	yes	yes	sufficient with concerns
Luciano 2020	COVID-19 lockdown: Physical activity, sedentary behaviour and sleep in Italian medicine students	COVID-19 pandemic led many countries to implement lockdown measures. Italy declared lockdown from 9th March to 3rd May 2020, and universities shifted to online classes. Home confinement could prevent students from achieving the physical activity and sleep levels recommended for their psychophysical health, and medicine students are already known to be at risk of inactivity and reduced sleep due t…	European Journal of Sport Science	2020-12-06	https://doi.org/10.1080/17461391.2020.1842910	Italy	Italy	394	25	2020-03-09	2020-05-03	79.25	38	before and during	before and during the pandemic (between-subject)	self-report	general population	adults	convenience sample	International Physical Activity Questionnaire	during	yes	yes	yes	yes	yes
Franco 2021	Decreased levels of physical activity: results from a cross-sectional study in southern Italy during the COVID-19 lockdown.	BACKGROUND: During the COVID-19 pandemic, the Italian government took security measures to try to limit infections. Restrictive measures included social distancing, home confinement and the closure of all public structures like gyms and swimming pools. The impact of these limitations on health and lifestyle was inevitably negative. The purpose of this study was to establish the level of physical …	Journal of Sports Medicine and Physical Fitness	2021-02-01	https://doi.org/10.23736/S0022-4707.20.11536-6	Italy	Italy	310	46.89	2020-05-12	2020-06-12	59.61	102	only during	during the pandemic and recollect before (within-subject)	self-report	general population	adults	convenience sample	International Physical Activity Questionnaire	after	yes	yes	yes	yes	yes
Mon-López 2020	The Influence of COVID-19 Isolation on Physical Activity Habits and Its Relationship with Convergence Insufficiency.	The purpose of this work is to evaluate the effects of confinement due to COVID-19 isolation on visual function, considering insufficient convergence as one of the possible effects of living the whole day in a reduced space. We pass a Convergence Insufficiency Symptom Survey (CISS) among 235 people to detect their habits before and after 25 confinement days. The data collection protocol consisted…	International Journal of Environmental Research and Public Health	2020-10-12	https://doi.org/10.3390/ijerph17207406	Spain	Spain	120	39.65	2020-04-20	2020-04-23	65.38	42	only during	during the pandemic and recollect before (within-subject)	self-report	general population	adults	convenience sample	International Physical Activity Questionnaire	before	yes	yes	yes	yes	yes
Wang 2020	Physical Distancing Measures and Walking Activity in Middle-aged and Older Residents in Changsha, China, During the COVID-19 Epidemic Period: Longitudinal Observational Study.	BACKGROUND: Physical distancing measures taken to contain COVID-19 transmission may substantially reduce physical activity levels and cause individuals to adopt a more sedentary lifestyle. OBJECTIVE: The objective of this study is to determine if there was any change in daily steps, an important component of daily physical activity, and examine risk factors for frequent low daily steps during the…	Journal of Medical Internet Research	2020-10-26	https://doi.org/10.2196/21632	China	China	3544	51.6	2020-01-21	2020-02-02	54.37	-1	before and during	before and during the pandemic (within-subject)	objective measures	general population	adults	defined sample			sufficient with concerns	yes	yes	yes	yes
Füzéki 2021	Physical Activity during the First COVID-19-Related Lockdown in Italy		International Journal of Environmental Research and Public Health	2021-03-03	https://doi.org/10.3390/ijerph18052511	Germany	Italy	1494	43.1	2020-04-15	2020-06-23	66.35	75	only during	during the pandemic and recollect before (within-subject)	self-report	general population	adults	convenience sample	European Health Interview Survey questionnaire	after	yes	yes	yes	yes	yes
Franco 2021	Physical Activity and Adherence to the Mediterranean Diet among Spanish Employees in a Health-Promotion Program before and during the COVID-19 Pandemic: The Sanitas-Healthy Cities Challenge		International Journal of Environmental Research and Public Health	2021-03-05	https://doi.org/10.3390/ijerph18052735	Spain	Spain	297	42.76	2020-05-01	2020-05-30	66.7	53	only during	during the pandemic and recollect before (within-subject)	self-report	general population	adults	convenience sample	short form of the International Physical Activity Questionnaire	during	yes	yes	yes	yes	yes
Rodríguez-Larrad 2021	Impact of COVID-19 Confinement on Physical Activity and Sedentary Behaviour in Spanish University Students: Role of Gender.	During the COVID-19 pandemic, entire populations were instructed to live in home-confinement to prevent the expansion of the disease. Spain was one of the countries with the strictest conditions, as outdoor physical activity was banned for nearly two months. This study aimed to analyse the changes in physical activity and sedentary behaviours in Spanish university students before and during the c…	International Journal of Environmental Research and Public Health	2021-01-06	https://doi.org/10.3390/ijerph18020369	Spain	Spain	13754	22.8	2020-04-16	2020-05-02	65.38	38	only during	during the pandemic and recollect before (within-subject)	self-report	general population	adults	convenience sample	International Physical Activity Questionnaire	before	yes	yes	yes	yes	yes
Castañeda-Babarro 2020	Physical Activity Change during COVID-19 Confinement.	Background: The lockdown and social distancing caused by COVID-19 may influence common health behavior. The unprecedent worldwide confinement, in which Spain has been one of the most affected-with severe rules governing confinement-may have changed physical activity (PA) and sedentary habits due to prolonged stays at home. Purpose: The aim of this study is to evaluate how self-reported PA and sed…	International Journal of Environmental Research and Public Health	2020-09-21	https://doi.org/10.3390/ijerph17186878	Spain	Spain	3800	42.7	2020-03-23	2020-04-01	58.88	14	only during	during the pandemic and recollect before (within-subject)	self-report	general population	adults	convenience sample	International Physical Activity Questionnaire	before	yes	yes	yes	yes	yes
Janssen 2020	Changes in Physical Activity, Sitting and Sleep across the COVID-19 National Lockdown Period in Scotland.	We examine the impact of the COVID-19 outbreak and concomitant restrictions (i.e., lockdown) on 24-hour movement behaviors (i.e., physical activity, sitting, sleep) in a purposive sample of people (n = 3230) reporting change recruited online. Participants' self-reported time spent in moderate-to-vigorous physical activity (MVPA), walking, sitting and sleep prior to lockdown (T1), during the first…	International Journal of Environmental Research and Public Health	2020-12-14	https://doi.org/10.3390/ijerph17249362	UK	UK	3241	46.2	2020-05-20	2020-06-12	59.45	63	only during	during the pandemic and recollect before (within-subject)	self-report	general population	adults	convenience sample	International Physical Activity Questionnaire	before	yes	yes	yes	yes	yes
Yamada 2020	Effect of the COVID-19 Epidemic on Physical Activity in Community-Dwelling Older Adults in Japan: A Cross-Sectional Online Survey.	OBJECTIVES: The objective of this study was to investigate changes in physical activity (PA) between January (before the COVID-19 epidemic) and April (during the COVID-19 epidemic) 2020 in community-dwelling older adults in Japan. DESIGN: Cross-sectional online survey. SETTING AND SUBJECTS: From April 23 to 27, 2020, an online survey was completed by 1,600 community-dwelling older adults in Japan…	The journal of Nutrition, Health & Aging	2020-06-23	https://doi.org/10.1007/s12603-020-1424-2	Japan	Japan	1600	74	2020-04-23	2020-04-27	41.03	63	only during	during the pandemic and recollect before (within-subject)	self-report	general population	seniors	convenience sample	International Physical Activity Questionnaire	after	yes	yes	yes	yes	yes
vanBakel 2021	Impact of COVID-19 lockdown on physical activity and sedentary behaviour in Dutch cardiovascular disease patients.	BACKGROUND: Coronavirus disease 2019 (COVID-19) lockdown restrictions may impact lifestyle and therefore also physical (in)activity patterns in patients with cardiovascular disease (CVD). This study aimed to evaluate the effect of lockdown on physical activity and sedentary behaviour. METHODS: Atotal of 1565 Dutch CVD patients participated in this prospective cohort study, in which we compared ph…	Netherlands Heart Journal	2021-02-25	https://doi.org/10.1007/s12471-021-01550-1	Netherlands	Netherlands	1433	65	2020-04-17	2020-04-24	61.54	38	before and during	before and during the pandemic (within-subject)	self-report	patients	seniors	convenience sample		after	yes	yes	yes	yes	yes
Ammar 2020	Effects of COVID-19 Home Confinement on Eating Behaviour and Physical Activity: Results of the ECLB-COVID19 International Online Survey.	BACKGROUND: Public health recommendations and governmental measures during the COVID-19 pandemic have resulted in numerous restrictions on daily living including social distancing, isolation and home confinement. While these measures are imperative to abate the spreading of COVID-19, the impact of these restrictions on health behaviours and lifestyles at home is undefined. Therefore, an internati…	Nutrients	2020-05-28	https://doi.org/10.3390/nu12061583	Germany	Multinational	1047		2020-04-06	2020-04-11			only during	during the pandemic and recollect before (within-subject)	self-report	general population	adults	convenience sample	International Physical Activity Questionnaire		yes	sufficient with concerns	yes	yes	yes
DiSebastiano 2020	Don't Walk So Close to Me: Physical Distancing and Adult Physical Activity in Canada	Background: In response to the COVID-19 pandemic, physical distancing measures have been implemented globally. Canadians have been instructed to stay at home, which has likely resulted in significant changes in their physical activity. Using data from a national physical activity tracking app (PAC app), we aimed to determine device-measured physical activity levels immediately prior to and follow…	Frontiers in Psychology	2020-07-27	https://doi.org/10.3389/fpsyg.2020.01895	Canada	Canada	2338		2020-04-13	2020-04-19	59.29	32	before and during	before and during the pandemic (within-subject)	objective measures	general population	adults	defined sample			yes	sufficient with concerns	yes	sufficient with concerns	sufficient with concerns
Szabo 2020	IMPACT OF COVID-19 ON THE PHYSICAL ACTIVITY AND WELL-BEING OF HUNGARIAN ATHLETES AND SPORTS PROFESSIONALS	Background. The COVID-19 pandemic had a significant effect on regular activities and lifestyles in Hungary in the second quarter of 2020. In this study, we identify the physical activity and mental well-being changes in the Hungarian sport sector. Material and methods. A questionnaire, which included internationally validated items, was created to survey members of the sporting sector in Hungary.…	Health Problems of Civilization	2020-10-09	https://doi.org/10.5114/hpc.2020.98471	Hungary	Hungary	840		2020-06-01	2020-06-14	55.72	84	only during	during the pandemic and recollect before (within-subject)	self-report	general population	adults	convenience sample	International Physical Activity Questionnaire	after	yes	sufficient with concerns	yes	sufficient with concerns	sufficient with concerns
Acs 2020	EFFECTS OF COVID-19 ON PHYSICAL ACTIVITY BEHAVIOR AMONG UNIVERSITY STUDENTS: RESULTS OF A HUNGARIAN ONLINE SURVEY	Background. Due to COVID-19, social isolation and home confinement have changed daily behavior in Hungary since the pandemic hit in early 2020. This study aimed to examine physical activity (PA) patterns among young adults before and during distancing and lockdown safety measures. Material and methods. We recruited 827 students online across 10 faculties at the University of Pecs during April and…	Health Problems of Civilization	2020-10-09	https://doi.org/10.5114/hpc.2020.98472	Hungary	Hungary	827	25.29	2020-04-01	2020-05-31	61.88	23	only during	during the pandemic and recollect before (within-subject)	self-report	general population	adults	convenience sample	International Physical Activity Questionnaire	during	yes	yes	yes	sufficient with concerns	sufficient with concerns
Barkley 2020	The Acute Effects of the COVID-19 Pandemic on Physical Activity and Sedentary Behavior in University Students and Employees.	The COVID-19 pandemic has closed non-essential businesses which may alter individuals' leisure behaviors. Consequently, physical activity and sedentary behavior may be negatively impacted as many fitness and recreational centers have been closed. This study aimed to examine the impact of the pandemic on physical activity and sedentary behavior in a sample of university students and employees befo…	International Journal of Exercise Science	2020-09-01		USA	USA	398	40.7	2020-03-06	2020-06-18	61.73	1	only during	during the pandemic and recollect before (within-subject)	self-report	general population	adults	convenience sample	Godin-Shephard Leisure-Time Physical Activity Questionnaire	during	yes	sufficient with concerns	yes	yes	no
DiStefano 2021	Significant reduction of physical activity in patients with neuromuscular disease during COVID-19 pandemic: the long-term consequences of quarantine.	BACKGROUND: Quarantine was the measure taken by governments to control the rapid spread of COVID-19. This restriction resulted in a sudden change in people's lifestyle, leading to an increase in sedentary behavior and a related decrease in the practice of physical activity (PA). However, in neuromuscular diseases patients need to perform regular PA to counteract the negative consequences of the d…	Journal of Neurology	2020-07-13	https://doi.org/10.1007/s00415-020-10064-6	Italy	Italy	268	56.72	2020-04-20	2020-05-04	82.88	80	only during	during the pandemic and recollect before (within-subject)	self-report	patients	adults	convenience sample	International Physical Activity Questionnaire	after	yes	yes	yes	yes	yes
López-Sánchez 2021	Comparison of physical activity levels in Spanish adults with chronic conditions before and during COVID-19 quarantine.	BACKGROUND: This is the first study analyzing levels of physical activity in a sample of quarantined adults with chronic conditions. The aim of this study was to compare moderate- and vigorous-intensity physical activity levels in Spanish adults with chronic conditions before and during coronavirus disease 2019 (COVID-19) quarantine. METHODS: A cross-sectional online survey was administered durin…	European Journal of Public Health	2020-10-10	https://doi.org/10.1093/eurpub/ckaa159	Spain	Spain	163		2020-04-01	2020-05-01	65.88	23	only during	during the pandemic and recollect before (within-subject)	self-report	patients	adults	convenience sample		before	yes	yes	yes	yes	yes
Nathan 2021	Impact of COVID-19 Restrictions on Western Australian Children’s Physical Activity and Screen Time	Physical activity is essential for children’s healthy development, yet COVID-19 physicaldistancing restrictions such as school closures and staying at home, playground closures, and the cancelling of organised community sport have dramatically altered children’s opportunities to be physically active. This study describes changes in levels of physical activity and screen time from February 2020 (i…	International Journal of Environmental Research and Public Health	2021-03-05	https://doi.org/10.3390/ijerph18052583	Australia	Australia	157	6.9	2020-05-01	2020-05-31	62.01	90	only during	during the pandemic and recollect before (within-subject)	self-report	general population	children	convenience sample		before	yes	yes	yes	yes	sufficient with concerns
Gallo 2020	The Impact of Isolation Measures Due to COVID-19 on Energy Intake and Physical Activity Levels in Australian University Students.	The coronavirus disease 2019 (COVID-19) pandemic resulted in physical isolation measures in many parts of the world. In Australia, nationwide restrictions included staying at home, unless seeking medical care, providing care, purchasing food, undertaking exercise, or attending work in an essential service. All undergraduate university classes transitioned to online, mostly home-based learning. We…	Nutrients	2020-06-23	https://doi.org/10.3390/nu12061865	Australia	Australia	150	20.56	2020-03-29	2020-04-03	60.05	57	before and during	before and during the pandemic (between-subject)	self-report	general population	adults	convenience sample	Active Australia Survey	before	yes	yes	yes	yes	no
Ong 2021	COVID-19-related mobility reduction: heterogenous effects on sleep and physical activity rhythms.	STUDY OBJECTIVES: Mobility restrictions imposed to suppress transmission of COVID-19 can alter physical activity (PA) and sleep patterns that are important for health and well-being. Characterization of response heterogeneity and their underlying associations may assist in stratifying the health impact of the pandemic. METHODS: We obtained wearable data covering baseline, incremental mobility res…	Sleep	2020-09-11	https://doi.org/10.1093/sleep/zsaa179	Singapore	Singapore	1824	30.94	2020-01-02	2020-04-27	38.23	-18	before and during	before and during the pandemic (within-subject)	objective measures	general population	adults	convenience sample			yes	yes	yes	sufficient with concerns	no
BaroneGibbs 2021	COVID-19 shelter-at-home and work, lifestyle and well-being in desk workers.	BACKGROUND: Emerging cross-sectional reports find that the COVID-19 pandemic and related social restrictions negatively affect lifestyle behaviours and mental health in general populations. AIMS: To study the longitudinal impact of COVID-19 on work practices, lifestyle and well-being among desk workers during shelter-at-home restrictions. METHODS: We added follow-up after completion of a clinical…	Occupational Medicine	2021-02-18	https://doi.org/10.1093/occmed/kqab011	USA	USA	112	45.4	2020-05-01				before and during	before and during the pandemic (within-subject)	self-report	general population	adults	convenience sample	Paffenbarger Physical Activity Questionnaire		yes	yes	yes	yes	sufficient with concerns
Maher 2021	Physical activity is positively associated with college students' positive affect regardless of stressful life events during the COVID-19 pandemic	The study was designed to determine associations between physical activity (PA) and affect before and during COVID-19 stay-at-home orders and how change in PA predicted change in affect during this time. Before and during COVID-19 stay-at-home orders, college students (n = 107) completed assessments of PA, positive and negative affect, sleep quality, food insecurity, and stressful life events (du…	Psychology of Sport and Exercise	2020-10-17	https://doi.org/10.1016/j.psychsport.2020.101826	USA	USA	107	21.7	2020-04-17	2020-05-05	66.67	43	before and during	before and during the pandemic (within-subject)	self-report	general population	adults	convenience sample	International Physical Activity Questionnaire	after	yes	sufficient with concerns	yes	yes	yes
Biviá-Roig 2020	Analysis of the Impact of the Confinement Resulting from COVID-19 on the Lifestyle and Psychological Wellbeing of Spanish Pregnant Women: An Internet-Based Cross-Sectional Survey.	(1) Background: This study aimed to analyze the impact of the confinement due to the COVID-19 pandemics on the eating, exercise, and quality-of-life habits of pregnant women. (2) Methods: This was an internet-based cross-sectional survey which collected information about adherence to the Mediterranean diet, physical exercise, health-related quality of life (HRQoL), and perceived obstacles (in ter…	International Journal of Environmental Research and Public Health	2020-08-15	https://doi.org/10.3390/ijerph17165933	Spain	Spain	90	33.1	2020-05-18	2020-05-31	65.29	70	only during	during the pandemic and recollect before (within-subject)	self-report	general population	adults	convenience sample		after	yes	yes	yes	yes	sufficient with concerns
Ruiz-Roso 2020	COVID-19 Lockdown and Changes of the Dietary Pattern and Physical Activity Habits in a Cohort of Patients with Type 2 Diabetes Mellitus.	The COVID-19 lockdown clearly affected the lifestyle of the population and entailed changes in their daily habits, which involved potential health consequences, especially on patients with Type 2 Diabetes Mellitus (T2DM). We aimed to examine the impact of the lockdown caused by COVID-19 pandemic on both nutrition and exercise habits, as well as the psychological effects in patients with T2DM, com…	Nutrients	2020-08-04	https://doi.org/10.3390/nu12082327	Spain	Spain	72	63	2020-04-08	2020-05-20	66.58	30	only during	during the pandemic and recollect before (within-subject)	self-report	patients	adults	convenience sample	International Physical Activity Questionnaire	during	yes	sufficient with concerns	yes	yes	sufficient with concerns
Puccinelli 2021b	Reduced level of physical activity during COVID-19 pandemic is associated with depression and anxiety levels: an internet-based survey		BMC Public Health	2020-03-01	https://doi.org/10.1186/s12889-021-10470-z	Brazil	Brazil	1843	38.6	2020-06-02	2020-06-12	73.08	82	only during	during the pandemic and recollect before (within-subject)	self-report	general population	adults	convenience sample	International Physical Activity Questionnaire	after	yes	yes	yes	yes	yes
Woodruff 2021	Stress, physical activity, and screen-related sedentary behaviour within the first month of the COVID-19 pandemic		Applied Psychology: Health and Well-Being	2021-03-01	https://doi.org/10.1111/aphw.12261	Canada	Canada	121	36.2	2020-04-01	2020-04-30	59.77	100	only during	during the pandemic and recollect before (within-subject)	self-report	general population	adults	convenience sample		before	yes	yes	yes	yes	yes
Werneck 2020	Changes in the clustering of unhealthy movement behaviors during the COVID-19 quarantine and the association with mental health indicators among Brazilian adults.	Our aim was to analyze the prevalence of unhealthy movement behavior clusters before and during the COVID-19 pandemic, as well as to investigate whether changes in the number of unhealthy behaviors during the COVID-19 pandemic quarantine were associated with mental health indicators. Data of 38,353 Brazilian adults from a nationwide behavior research were used. For movement behaviors, participant…	Translational Behavioral Medicine	2020-11-06	https://doi.org/10.1093/tbm/ibaa095	Brazil	Brazil	38353		2020-04-24	2020-05-24	72.04	43	only during	during the pandemic and recollect before (within-subject)	self-report	general population	adults	convenience sample	Brazilian Telephone-based Risk Factor Surveillance System for Chronic Diseases Questionnaire	before	yes	sufficient with concerns	yes	yes	no
Genin 2021	How Did the COVID-19 Confinement Period Affect Our Physical Activity Level and Sedentary Behaviors? Methodology and First Results From the French National ONAPS Survey.	BACKGROUND: The French National Observatory for Physical Activity and Sedentary Behaviors conducted a national survey aiming to evaluate the potential effects of confinement on the population's physical activity levels and sedentary behaviors. METHODS: In close collaboration with the French Ministry of Sports and a selected expert committee, 3 different questionnaires investigating 3 subgroup pop…	Journal of Physical Activity & Health	2021-02-13	https://doi.org/10.1123/jpah.2020-0449	France	France	22895		2020-04-15	2020-05-06	68.71	46	only during	during the pandemic and recollect before (within-subject)	self-report	general population	adults	convenience sample	International Physical Activity Questionnaire	before	yes	sufficient with concerns	yes	yes	sufficient with concerns
Brand 2020	When Pandemic Hits: Exercise Frequency and Subjective Well-Being During COVID-19 Pandemic	The governmental lockdowns related to the COVID-19 pandemic have forced people to change their behavior in many ways including changes in exercise. We used the brief window of global lockdown in the months of March/April/May 2020 as an opportunity to investigate the effects of externally imposed restrictions on exercise-related routines and related changes in subjective well-being. Statistical an…	Frontiers in Psychology	2020-09-24	https://doi.org/10.3389/fpsyg.2020.570567	Germany	Multinational	13696	34.1	2020-03-29	2020-05-07			only during	during the pandemic and recollect before (within-subject)	self-report	general population	adults	convenience sample			yes	yes	yes	yes	yes
Rogers 2020	Behavioral Change Towards Reduced Intensity Physical Activity Is Disproportionately Prevalent Among Adults With Serious Health Issues or Self-Perception of High Risk During the UK COVID-19 Lockdown	Objectives:We assessed whether lockdown had a disproportionate impact on physical activity behavior in groups who were, or who perceived themselves to be, at heightened risk from COVID-19. Methods:Physical activity intensity (none, mild, moderate, or vigorous) before and during the UK COVID-19 lockdown was self-reported by 9,190 adults between 2020-04-06 and 2020-04-22. Physician-diagnosed health…	Frontiers in Public Health	2020-09-30	https://doi.org/10.3389/fpubh.2020.575091	UK	UK	9190		2020-04-06	2020-04-22	57.69	19	only during	during the pandemic and recollect before (within-subject)	self-report	patients	adults	convenience sample		before	yes	yes	yes	yes	yes
Ugbolue 2020	An Assessment of the Novel COVISTRESS Questionnaire: COVID-19 Impact on Physical Activity, Sedentary Action and Psychological Emotion	Globally the COVID-19 pandemic outbreak has triggered an economic downturn and a rise in unemployment. As a result, global communities have had to face physical, health, psychological and socio-economical related stressors. The purpose of this study was to assess and report the impact of isolation and effect of coronavirus on selected psychological correlates associated with emotions. Following e…	Journal of Clinical Medicine	2020-10-19	https://doi.org/10.3390/jcm9103352	China	Multinational	9142	42.19	2020-03-30	2020-06-10			only during	during the pandemic and recollect before (within-subject)	self-report	general population	adults	convenience sample	COVISTRESS Questionaire		yes	yes	yes	sufficient with concerns	sufficient with concerns
Yan 2020	Perceived risk, behavior changes and Health-related outcomes during COVID-19 pandemic: Findingsamong adults with and without diabetesin China.	AIMS: To examine perceived infection risk of COVID-19 and the health and related behavior changes among people with diabetes, compared with people without diabetes, and to examine factors associated with self-reported health during the national quarantine period in China. METHODS: The 2020 China COVID-19 Survey is an anonymous 74-item survey administered via social media across China. A national …	Diabetes Research and Clinical Practice	2020-07-22	https://doi.org/10.1016/j.diabres.2020.108350	USA	China	9016		2020-04-25	2020-05-11	60.69	94	only during	during the pandemic: less or more	self-report	patients	adults	convenience sample	International Physical Activity Questionnaire	before	yes	yes	yes	yes	sufficient with concerns
Katewongsa 2020	The effects of the COVID-19 pandemic on the physical activity of the Thai population: Evidence from Thailand's Surveillance on Physical Activity 2020.	BACKGROUND: The coronavirus disease-2019 (COVID-19) pandemic has undoubtedly disrupted the physical activity (PA) of the Thai population. This study examined the effect of the COVID-19 pandemic on moderate-to-vigorous PA (MVPA) of Thai adults and assessed the effects of the national curfew policy and health-promotion campaigns on influencing PA during the pandemic. METHODS: Thailand's Surveillanc…	Journal of Sport and Health Science	2020-10-09	https://doi.org/10.1016/j.jshs.2020.10.001	Thailand	Thailand	8942		2020-03-29	2020-05-02	64.55	19	before and during	before and during the pandemic (between-subject)	self-report	general population	adults	convenience sample	Global Physical Activity Questionnaire	during	yes	yes	yes	yes	sufficient with concerns
Bourdas 2020	Impact of COVID-19 Lockdown on Physical Activity in a Sample of Greek Adults	It is well known that physical inactivity increases the risk of global death; however, the impact of the coronavirus disease 2019 (COVID-19) lockdown strategy on physical activity (PA) remains unclear. This study compared PA-i.e., daily occupation, transportation to and from daily occupation, leisure time activities, and regular sporting activities-prior (PRE) and during (POST) the on-going COVID…	Sports	2020-10-21	https://doi.org/10.3390/sports8100139	Greece	Greece	8495	37.2	2020-04-04	2020-04-19	62.18	26	only during	during the pandemic and recollect before (within-subject)	self-report	general population	adults	convenience sample	Active-Q Questionnaire	before	yes	yes	yes	yes	sufficient with concerns
Faulkner 2021	Physical activity, mental health and well-being of adults during initial COVID-19 containment strategies: A multi-country cross-sectional analysis.	OBJECTIVES: To assess physical activity (PA), mental health and well-being of adults in the United Kingdom (UK), Ireland, New Zealand and Australia during the initial stages of National governments' Coronavirus disease (COVID-19) containment responses. DESIGN: Observational, cross-sectional. METHODS: An online survey was disseminated to adults (n=8,425; 44.5±14.8y) residing in the UK, Ireland, Ne…	Journal of Science and Medicine in Sport	2020-12-02	https://doi.org/10.1016/j.jsams.2020.11.016	UK	Multinational	8425	44.5	2020-04-03	2020-05-17			only during	during the pandemic and recollect before (within-subject)	self-report	general population	adults	convenience sample	International Physical Activity Questionnaire		yes	yes	yes	yes	yes
Zhou 2021	Impact of COVID-19 Lockdown on Physical Activity Among the Chinese Youths: The COVID-19 Impact on Lifestyle Change Survey (COINLICS).	Background: The study sought to assess the changes in physical activity (PA) and sedentary time among Chinese youths at different stages after the COVID-19 outbreak. Methods: It was based on a retrospective online survey conducted in May 2020. More than 10,000 youths voluntarily recalled their PA-related information at three stages: before COVID-19 (January), during lockdown (February), and after…	Frontiers in Public Health	2021-02-04	https://doi.org/10.3389/fpubh.2021.592795	China	China	8115	20	2020-05-09	2020-05-24	74.88	108	only during	during the pandemic and recollect before (within-subject)	self-report	general population	adults	convenience sample	International Physical Activity Questionnaire	before	yes	yes	yes	yes	yes
Fearnbach 2021	Factors Protecting against a Decline in Physical Activity during the COVID-19 Pandemic.	PURPOSE: The spread of COVID-19 and the associated stay-at-home orders and shutdowns of gyms and fitness centers has drastically influenced health behaviors leading to widespread reductions in physical activity (PA). The recent Call to Action from the American College of Sports Medicine has promoted "innovative strategies to promote PA during the COVID-19 pandemic". We aimed to identify individua…	Medicine and Science in Sports and Exercise	2021-01-15	https://doi.org/10.1249/MSS.0000000000002602	USA	USA	4376	52	2020-04-03	2020-05-03	66.42	29	only during	during the pandemic and recollect before (within-subject)	self-report	general population	adults	convenience sample	Nurses Health Study Physical Activity Questionnaire	during	yes	yes	yes	yes	yes
CheikhIsmail 2020	Assessment of eating habits and lifestyle during the coronavirus 2019 pandemic in the Middle East and North Africa region: a cross-sectional study.	Coronavirus disease 2019 (COVID-19) has rapidly spread globally, forcing countries to apply lockdowns and strict social distancing measures. The aim of this study was to assess eating habits and lifestyle behaviours among residents of the Middle East and North Africa (MENA) region during the lockdown. A cross-sectional study among adult residents of the MENA region was conducted using an online q…	The British Journal of Nutrition	2020-10-17	https://doi.org/10.1017/S0007114520004547	United Arab Emirates	Multinational	2970		2020-04-15	2020-04-29			only during	during the pandemic and recollect before (within-subject)	self-report	general population	adults	convenience sample	International Physical Activity Questionnaire		yes	yes	yes	yes	yes
Lopez-Bueno 2020	COVID-19 Confinement and Health Risk Behaviors in Spain	The World Health Organization (WHO) has declared a world pandemic due to COVID-19. In response, most affected countries have enacted measures involving compulsory confinement and restrictions on free movement, which likely influence citizens' lifestyles. This study investigates changes in health risk behaviors (HRBs) with duration of confinement. An online cross-sectional survey served to collect…	Frontiers in Psychology	2020-06-04	https://doi.org/10.3389/fpsyg.2020.01426	Spain	Spain	2741	34.2	2020-03-22	2020-04-05	60.06	13	only during	during the pandemic and recollect before (within-subject)	self-report	general population	adults	convenience sample	Physical Activity Vital Sign Short Form	before	yes	yes	yes	yes	yes
Cloosterman 2021	Running behavior and symptoms of respiratory tract infection during the COVID-19 pandemic: A large prospective Dutch cohort study.	OBJECTIVES: To explore changes in running behavior due to the Coronavirus Disease 2019 (COVID-19) pandemic, assess presence of symptoms suggestive for COVID-19 and identify whether there is an association between running behavior and COVID-19. DESIGN: Prospective cohort study. METHODS: For this study we used a cohort of runners participating in an ongoing randomized controlled trial on running in…	Journal of Science and Medicine in Sport	2020-10-20	https://doi.org/10.1016/j.jsams.2020.10.009	Netherlands	Netherlands	2586						before and during	before and during the pandemic (within-subject)	self-report	athletes/exercisers	adults	convenience sample			yes	no	yes	yes	sufficient with concerns
Maugeri 2020	The impact of physical activity on psychological health during Covid-19 pandemic in Italy	The worldwide spread of COVID-19 has upset the normality of Italian daily life, forcing population to social distancing and self -isolation. Since the containment precautions also concern sport -related activities, home workout remained the only possibility to play sports and stay active during the pandemic. The present study aimed to examine changes in the physical activity levels during self -q…	Heliyon	2020-06-24	https://doi.org/10.1016/j.heliyon.2020.e04315	Italy	Italy	2524		2020-04-01	2020-04-30	82.98	61	only during	during the pandemic and recollect before (within-subject)	self-report	general population	adults	convenience sample	International Physical Activity Questionnaire	during	yes	yes	yes	yes	yes
Xiang 2020	Impact of COVID-19 pandemic on children and adolescents' lifestyle behavior larger than expected.		Progress in Cardiovascular Diseases	2020-04-30	https://doi.org/10.1016/j.pcad.2020.04.013	China	China	2426		2020-01-03	2020-03-23	55.89	-19	before and during	before and during the pandemic (within-subject)	self-report	general population	children	convenience sample	Global Physical Activity Questionnaire	before	yes	no	yes	sufficient with concerns	sufficient with concerns
Fernandez-Rio 2021	Mental well-being profiles and physical activity in times of social isolation by the COVID-19: a latent class analysis	The aim was to identify mental well-being profiles emerged during the COVID-19 home isolation. Given the multifaceted and multidirectionality of mental well-being, depressive symptoms, affect and resilience were selected as factors (indicators) and gender, age, Body Mass Index and physical activity as correlates. A second goal was to uncover the connections between these profiles and physical act…	International Journal of Sport and Exercise Psychology	2021-02-01	https://doi.org/10.1080/1612197X.2021.1877328	Spain	Spain	2423	39.74	2020-03-21	2020-03-28	56.09	12	only during	during the pandemic and recollect before (within-subject)	self-report	general population	adults	convenience sample	International Physical Activity Questionnaire	before	yes	yes	yes	yes	yes
Wang 2020	Bidirectional Influence of the COVID-19 Pandemic Lockdowns on Health Behaviors and Quality of Life among Chinese Adults.	BACKGROUND: The coronavirus disease 2019 (COVID-19) pandemic has created challenges that have caused profound changes in health behaviors. This study aimed to explore how COVID-19 is affecting the health-related quality of life (QoL) among Chinese adults. METHODS: The data of health-related behaviors and QoL were collected via online surveys from 2289 adults (mean age = 27.8 ± 12 years) who had b…	International Journal of Environmental Research and Public Health	2020-08-02	https://doi.org/10.3390/ijerph17155575	China	China	2289	27.5	2020-03-23	2020-04-26	63.66	61	only during	during the pandemic and recollect before (within-subject)	self-report	general population	adults	convenience sample	International Physical Activity Questionnaire	before	yes	yes	yes	no	no
Burnett 2021	Change in time spent visiting and experiences of green space following restrictions on movement during the COVID-19 pandemic: a nationally representative cross-sectional study of UK adults	Objectives Green space positively influences health and well-being; however, inequalities in use of green space are prevalent. Movement restrictions enforced due to the COVID-19 pandemic could have exacerbated existing inequalities regarding who visits green space. Therefore, this study aimed to explore how movement restrictions have changed the time spent visiting green space and experience of g…	BMJ Open	2021-01-25	https://doi.org/10.1136/bmjopen-2020-044067	UK	UK	2252		2020-04-30	2020-05-01	58.65	43	only during	during the pandemic: less or more	self-report	general population	adults	representative		before	yes	yes	yes	no	yes
Alomari 2020	Changes in Physical Activity and Sedentary Behavior Amid Confinement: The BKSQ-COVID-19 Project	Background: Coronavirus disease 19 (COVID-19) has compelled implementing confinement measure across the globe. These measures can potentially lead to many changes in lifestyle. However, no studies examined the effect of COVID-19-induced confinement on physical activity (PA) and sedentary behavior (SB). Methods: During April and May of 2020, the current study surveyed changes in PA and SB induced …	Risk Management and Healthcare Policy	2020-09-25	https://doi.org/10.2147/RMHP.S268320	Qatar	Jordan	1844	33.7	2020-04-01	2020-05-31	70.92	17	only during	during the pandemic: less or more	self-report	general population	adults	convenience sample		after	yes	yes	yes	yes	sufficient with concerns
Knell 2020	Health Behavior Changes During COVID-19 Pandemic and Subsequent "Stay-at-Home" Orders.	The COVID-19 pandemic, and resultant "Stay-at-Home" orders, may have impacted adults' positive health behaviors (sleep, physical activity) and negative health behaviors (alcohol consumption, drug use, and tobacco use). The purpose of this study was to investigate how these health behaviors changed (increased/improved or decreased/worsened) at the early stages of the pandemic, what participant cha…	International Journal of Environmental Research and Public Health	2020-08-28	https://doi.org/10.3390/ijerph17176268	USA	USA	1809		2020-04-15	2020-05-05	66.67	41	only during	during the pandemic: less or more	self-report	general population	adults	convenience sample	International Physical Activity Questionnaire	after	yes	yes	yes	yes	yes
SchmidtSCE 2020	Physical activity and screen time of children and adolescents before and during the COVID-19 lockdown in Germany: a natural experiment.	The impact of COVID-19 on social life has been drastic and global. However, the different numbers of cases and different actions in different countries have been leading to various interesting yet unexplored effects on human behavior. In the present study, we compare the physical activity and recreational screen time of a representative sample of 1711 4- to 17-year-olds before and during the stri…	Scientific Reports	2020-12-11	https://doi.org/10.1038/s41598-020-78438-4	Germany	Germany	1711	11.34	2020-04-20	2020-05-01	64.18	54	before and during	before and during the pandemic (within-subject)	self-report	general population	children	representative	MoMo Physical Activity Questionnaire	during	yes	yes	yes	yes	yes
Martinez 2020	Physical activity in periods of social distancing due to COVID-19: a cross-sectional survey.	Physical inactivity and sedentary behavior are associated with poor physical and mental health. The article aims to assess the changes in the habits of the Brazilian participants engaged in physical activities in relation to their practices, due the measures of social distancing during the COVID-19 epidemic in 2020. The secondary objective was to describe their levels of anxiety and depression. T…	Ciência & Saúde Coletiva	2020-07-25	https://doi.org/10.1590/1413-812320202510.2.27242020	Brazil	Brazil	1613	35.7	2020-05-11	2020-05-15	73.08	60	only during	during the pandemic and recollect before (within-subject)	self-report	general population	adults	convenience sample		before	yes	yes	yes	yes	sufficient with concerns
Cooper 2021	Self-weighing Practices and Associated Health Behaviors during COVID-19.	Objective: In this study, we investigated self-weighing frequency (SWF) among adults during the COVID-19 pandemic and retrospectively (6 months) before the pandemic, and whether SWF was associated with changes in health-related behaviors. Methods: United States adults (N = 1607) completed a health-related questionnaire during COVID-19 and associated shelter-in-place. We categorized respondents in…	American Journal of Health Behavior	2021-01-01	https://doi.org/10.5993/AJHB.45.1.2	USA	USA	1607	38	2020-04-24	2020-05-04	66.67	50	only during	during the pandemic and recollect before (within-subject)	self-report	general population	adults	convenience sample	International Physical Activity Questionnaire	after	yes	yes	yes	yes	no
Tornaghi 2020	Physical activity levels across COVID-19 outbreak in youngsters of Northwestern Lombardy.	BACKGROUND: Italy early experienced one of the most suffering impact of the COVID-19 outbreak in terms of number of cases and death toll. Progressively, more compelling national restrictions hardened citizens' lifestyle and habits, including limiting mobility and outdoor physical activity (PA). In a second phase, people were allowed to perform outdoor activities close to their houses and thereaft…	The Journal of Sports Medicine and Physical Fitness	2020-12-03	https://doi.org/10.23736/S0022-4707.20.11600-1	Italy	Italy	1568		2020-04-04	2020-04-10	82.64	64	before and during	before and during the pandemic (within-subject)	self-report	general population	children	convenience sample	International Physical Activity Questionnaire	before	yes	no	yes	yes	sufficient with concerns
Spence 2020	Determinants of physical activity among adults in the United Kingdom during the COVID-19 pandemic: The DUK-COVID study	Objectives This study examined the impact of the COVID-19 lockdown on the physical activity (PA) of UK adults and potential motivational determinants of such behaviour. Design and methods A survey was conducted with 1,521 UK adults recruited through Prolific.co in early June 2020. Along with demographic information, questions assessed current PA, changes in PA modalities (i.e., overall, around th…	British Journal of Health Psychology	2020-12-17	https://doi.org/10.1111/bjhp.12497	Canada	Multinational	1497		2020-06-01	2020-06-01			only during	during the pandemic and recollect before (within-subject)	self-report	general population	adults	representative			yes	yes	yes	yes	sufficient with concerns
Mitra 2020	Healthy movement behaviours in children and youth during the COVID-19 pandemic: Exploring the role of the neighbourhood environment.	This paper explores patterns of increased/ decreased physical activity, sedentary and sleep behaviours among Canadian children and youth aged 5-17 years during the COVID-19 pandemic, and examines how these changes are associated with the built environment near residential locations. A cluster analysis identified two groups who were primarily distinguished by the changes in outdoor activities. Com…	Health & Place	2020-08-29	https://doi.org/10.1016/j.healthplace.2020.102418	Canada	Canada	1472	11.29	2020-04-01	2020-04-30	59.77	20	only during	during the pandemic: less or more	self-report	general population	children	representative		before	yes	sufficient with concerns	yes	yes	sufficient with concerns
Gallè 2020	Sedentary Behaviors and Physical Activity of Italian Undergraduate Students during Lockdown at the Time of CoViD-19 Pandemic.	Background: From March to May 2020, lockdown measures were adopted in Italy to contain the epidemic of the novel Coronavirus. People were forced to restrict their movement and social contacts, therefore having a higher risk of inactivity. This study, carried out among Italian undergraduates, explored their sedentary and physical activities (PA) during the lockdown with respect to their previous h…	International Journal of Environmental Research and Public Health	2020-08-25	https://doi.org/10.3390/ijerph17176171	Italy	Italy	1430	22.9	2020-05-11	2020-05-31	63.81	101	only during	during the pandemic and recollect before (within-subject)	self-report	general population	adults	convenience sample	International Physical Activity Questionnaire	after	yes	yes	yes	yes	sufficient with concerns
Eek 2021	Self-Perceived Changes in Physical Activity and the Relation to Life Satisfaction and Rated Physical Capacity in Swedish Adults during the COVID-19 Pandemic-A Cross Sectional Study.	COVID-19 restrictions may prevent people from reaching recommended levels of physical activity (PA). This study examines self-perceived changes in the extent and intensity of PA during the COVID-19 pandemic, and the relation between perceived changes in PA and general life satisfaction and perceived physical capacity. A total of 1318 participants (mean age 47.8 SD12.6; 82.1% women) were recruited…	International Journal of Environmental Research and Public Health	2021-01-14	https://doi.org/10.3390/ijerph18020671	Sweden		1318	47.8					only during	during the pandemic and recollect before (within-subject)	self-report	general population	adults	convenience sample	International Physical Activity Questionnaire		yes	yes	yes	yes	sufficient with concerns
Ng 2020	Barriers and facilitators to changes in adolescent physical activity during COVID-19	Objectives COVID-19 restrictions reduced adolescents' opportunities for physical activity (PA). The purpose of this study was to examine how adolescent PA changed during school closures, to identify the key barriers and facilitators for these changes during lockdown and to use this information to understand how to manage future crises' situations positively to prevent physical inactivity. Methods…	BMJ Open Sport & Exercise Medicine	2020-11-04	https://doi.org/10.1136/bmjsem-2020-000919	Ireland	Ireland	1214		2020-04-01	2020-04-30	68.59	20	only during	during the pandemic: less or more	self-report	general population	children	convenience sample	PACE + Adolescent Physical Activity Measure	before	yes	yes	yes	yes	yes
Brancaccio 2021	Effects of the COVID-19 Pandemic on Job Activity, Dietary Behaviours and Physical Activity Habits of University Population of Naples, Federico II-Italy.	Coronaviruses (CoVs) are a large family of respiratory viruses that can cause mild to moderate illness. The new variant COVID-19 has started to spread rapidly since December 2019, posing a new threat to global health. To counter the spread of the virus, the Italian government forced the population to close all activities starting from 9 March 2020 to 4 May 2020. In this scenario, we conducted a c…	International Journal of Environmental Research and Public Health	2021-02-05	https://doi.org/10.3390/ijerph18041502	Italy	Italy	1130	28.4	2020-05-01	2020-05-31	65.64	91	only during	during the pandemic and recollect before (within-subject)	self-report	general population	adults	convenience sample		after	yes	yes	yes	yes	sufficient with concerns
Chang 2020	Exercise Behavior and Mood during the COVID-19 Pandemic in Taiwan: Lessons for the Future.	The Coronavirus disease 2019 (COVID-19) pandemic and its associated governmental recommendations and restrictions have influenced many aspects of human life, including exercise and mental health. This study aims to explore the influence of COVID-19 on exercise behavior and its impact on mood states, as well as predict changes in exercise behavior during a similar future pandemic in Taiwan. A cros…	International Journal of Environmental Research and Public Health	2020-09-28	https://doi.org/10.3390/ijerph17197092	Taiwan	Taiwan	1114	35.9	2020-04-07	2020-05-13	39.19	75	only during	during the pandemic and recollect before (within-subject)	self-report	general population	adults	convenience sample		during	yes	yes	yes	yes	yes
Nienhuis 2020	The Impact of COVID-19 on Women's Physical Activity Behavior and Mental Well-Being.	BACKGROUND: A global pandemic caused by COVID-19 resulted in restrictions to daily living for Canadians, including social distancing and closure of recreation facilities and provincial parks. METHODS: The objective of this study was to assess whether sex differences exist in physical activity and well-being since COVID-19 and to explore how barriers or facilitators to physical activity may explai…	International Journal of Environmental Research and Public Health	2020-12-04	https://doi.org/10.3390/ijerph17239036	Canada	Canada	1098	42	2020-04-01	2020-05-01	59.79	20	only during	during the pandemic: less or more	self-report	general population	adults	convenience sample	Godin-Shephard Leisure-Time Physical Activity Questionnaire	before	yes	yes	yes	yes	yes
Hu 2020	Impact of the COVID-19 Epidemic on Lifestyle Behaviors and Their Association With Subjective Well-Being Among the General Population in Mainland China: Cross-Sectional Study.	BACKGROUND: The world is experiencing an unprecedented challenge due to the coronavirus disease (COVID-19) pandemic. However, it is unclear whether people's lifestyles will change as a result. OBJECTIVE: The aim of this study is to explore perceived lifestyle changes after the outbreak of COVID-19 and their association with subjective well-being (SWB) among the general population in Mainland Chin…	Journal of Medical Internet Research	2020-08-25	https://doi.org/10.2196/21176	China	China	1033		2020-05-10	2020-05-15	75.96	109	only during	during the pandemic: less or more	self-report	general population	adults	convenience sample	International Physical Activity Questionnaire	before	yes	yes	yes	yes	sufficient with concerns
Sasaki 2021	Associations between Socioeconomic Status, Social Participation, and Physical Activity in Older People during the COVID-19 Pandemic: A Cross-Sectional Study in a Northern Japanese City.	Physical activity (PA) is a key determinant of health in older adults. However, little is known about the effect of social factors on PA among older adults during the coronavirus disease 2019 (COVID-19) pandemic. Therefore, we aimed to clarify the association between socioeconomic status, social participation, and PA during the pandemic. A cross-sectional study was conducted on 999 community-dwel…	International Journal of Environmental Research and Public Health	2021-02-04	https://doi.org/10.3390/ijerph18041477	Japan	Japan	999	74.5	2020-08-01	2020-08-31	33.54	163	only during	during the pandemic and recollect before (within-subject)	self-report	general population	seniors	representative	International Physical Activity Questionnaire	after	yes	yes	yes	yes	yes
BuoiteStella 2020	Smart technology for physical activity and health assessment during COVID-19 lockdown.	BACKGROUND: The worldwide lockdown in response to COVID-19 pandemics has often led to physical inactivity and social distancing. When combined, these factors may affect quality and life and increase the risk of different diseases. Therefore, assessment of physical activity levels should be encouraged to monitor and identify those at a higher risk of inactivity. Smart technology is a promising too…	The Journal of Sports Medicine and Physical Fitness	2020-10-22	https://doi.org/10.23736/S0022-4707.20.11373-2	Italy	Italy	400	35	2020-03-23	2020-03-29	76.28	52	before and during	before and during the pandemic (within-subject)	objective measures	general population	adults	convenience sample	International Physical Activity Questionnaire		yes	yes	yes	yes	yes
SáCDSC 2020	COVID-19 SOCIAL ISOLATION IN BRAZIL: EFFECTS ON THE PHYSICAL ACTIVITY ROUTINE OF FAMILIES WITH CHILDREN.	OBJECTIVE: To identify how Brazilian families with children aged under 13 years face the period of social isolation resulting from the COVID-19 pandemic, especially regarding the time spent on physical activity (PA), intellectual activity, games, outdoor activities and screen. METHODS: An anonymous online survey was launched on March 24, 2020 in Brazil to assess how families with children aged up…	Revista Paulista de Pediatria	2020-11-11	https://doi.org/10.1590/1984-0462/2021/39/2020159	Brazil	Brazil	816		2020-03-25	2020-04-24	64.62	13	only during	during the pandemic: less or more	self-report	general population	children	convenience sample		before	yes	sufficient with concerns	yes	yes	sufficient with concerns
Giustino 2020	Physical Activity Levels and Related Energy Expenditure during COVID-19 Quarantine among the Sicilian Active Population: A Cross-Sectional Online Survey Study	Background: During the coronavirus disease 2019 (COVID-19) pandemic, the Italian government has adopted containment measures to control the virus's spread, including limitations to the practice of physical activity (PA). The aim of this study was to estimate the levels of PA, expressed as energy expenditure (MET-minute/week), among the physically active Sicilian population before and during the l…	Sustainability	2020-05-26	https://doi.org/10.3390/su12114356	Italy	Multinational	802	32.27	2020-03-30	2020-04-02			only during	during the pandemic and recollect before (within-subject)	self-report	general population	adults	convenience sample	International Physical Activity Questionnaire		yes	yes	yes	yes	yes
Ruíz-Roso 2020	Changes of Physical Activity and Ultra-Processed Food Consumption in Adolescents from Different Countries during Covid-19 Pandemic: An Observational Study.	AIM: to describe physical activity and ultra-processed foods consumption, their changes and sociodemographic predictors among adolescents from countries in Europe (Italy and Spain) and Latin America (Brazil, Chile, and Colombia) during the SARS-CoV-2-pandemic period. METHODS: Cross-sectional study via web survey. International Physical Activity Questionnaire (IPAQ) and weekly ultra-processed food…	Nutrients	2020-07-30	https://doi.org/10.3390/nu12082289	Spain	Multinational	726		2020-04-17	2020-05-20			only during	during the pandemic and recollect before (within-subject)	self-report	general population	children	convenience sample	International Physical Activity Questionnaire		yes	yes	yes	no	yes
Gilic 2020	Contextualizing Parental/Familial Influence on Physical Activity in Adolescents before and during COVID-19 Pandemic: A Prospective Analysis	Parental and familial factors influence numerous aspects of adolescents' lives, including their physical activity level (PAL). The purpose of this study was to evaluate the changes in PAL which occurred during the COVID-19 pandemic, and to evaluate influence of sociodemographic and parental/familial factors on PAL levels before and during pandemic in adolescents from Bosnia and Herzegovina. The s…	Children (Basel, Switzerland)	2020-09-03	https://doi.org/10.3390/children7090125	Croatia	Bosnia and Herzegovina	688	17.41	2020-04-20	2020-04-26	74.45	41	before and during	before and during the pandemic (within-subject)	self-report	general population	children	convenience sample	Physical Activity Questionnaire	after	yes	yes	yes	yes	yes
Dunton 2020	Early effects of the COVID-19 pandemic on physical activity locations and behaviors in adults living in the United States.	COVID-19 restrictions andsocial-distancing may inhibit adults from attaining recommended levels of physical activity. This study examined early impact of COVID-19 pandemic on physical activity in adults during the first two months of restrictions in the U.S.and how physical activity locations were associated with physical activity levels during this period. Adults (N=268) completed an online surv…	Preventive Medicine Reports	2020-11-05	https://doi.org/10.1016/j.pmedr.2020.101241	USA	USA	268	33.96	2020-04-10	2020-05-25	66.67	36	only during	during the pandemic and recollect before (within-subject)	objective measures	general population	adults	convenience sample	International Physical Activity Questionnaire		yes	yes	yes	yes	yes
Amini 2020	Physical activity during COVID-19 pandemic in the Iranian population: A brief report.	COVID-19 pandemic and restrictive public health measures due to it can have many effects on physical activity. Our study aimed to compare the levels of physical activity levels (expressed as MET-minute/week), among Qom city (Iran) adults in pre and during the COVID-19 pandemic (January 2020 and 20 to 29 May 2020, respectively). 670 adults were included in this study and grouped based on age and g…	Heliyon	2020-11-02	https://doi.org/10.1016/j.heliyon.2020.e05411	Iran	Iran	670	29.24	2020-05-20	2020-05-29	44.23	76	before and during	before and during the pandemic (within-subject)	self-report	general population	adults	convenience sample	International Physical Activity Questionnaire	before	yes	sufficient with concerns	yes	yes	sufficient with concerns
Hisamatsu 2021	Effect of Coronavirus Disease 2019 Pandemic on Physical Activity in a Rural Area of Japan: The Masuda Study		Journal of Epidemiology	2021-01-13	https://doi.org/10.2188/jea.JE20200598	Japan	Japan	242		2020-03-11	2020-05-25	38.59	20	before and during	before and during the pandemic (within-subject)	objective measures	general population	adults	convenience sample			yes	sufficient with concerns	yes	sufficient with concerns	sufficient with concerns
Zheng 2020	COVID-19 Pandemic Brings a Sedentary Lifestyle in Young Adults: A Cross-Sectional and Longitudinal Study.	The coronavirus disease 2019 (COVID-19) pandemic continues to pose profound challenges to society. Its spread has been mitigated through strategies including social distancing; however, this may result in the adoption of a sedentary lifestyle. This study aimed to investigate: (1) physical activity (PA) levels, sedentary behavior (SB), and sleep in young adults during the COVID-19 epidemic, and (2…	International Journal of Environmental Research and Public Health	2020-09-19	https://doi.org/10.3390/ijerph17176035	China	China	631	21.1	2020-04-15	2020-04-26	58.65	84	before and during	before and during the pandemic (within-subject)	self-report	general population	adults	convenience sample	International Physical Activity Questionnaire	before	yes	yes	yes	sufficient with concerns	sufficient with concerns
Giuntella 2021	Lifestyle and mental health disruptions during COVID-19.	Using a longitudinal dataset linking biometric and survey data from several cohorts of young adults before and during the COVID-19 pandemic ([Formula: see text]), we document large disruptions to physical activity, sleep, time use, and mental health. At the onset of the pandemic, average steps decline from 10,000 to 4,600 steps per day, sleep increases by 25 to 30 min per night, time spent social…	Proceedings of the National Academy of Sciences of the United States of America	2020-12-12	https://doi.org/10.1073/pnas.2016632118	USA	USA	217	19.22	2020-02-01	2020-04-30	39.21	-33	before and during	before and during the pandemic (between-subject)	objective measures	general population	adults	convenience sample			yes	yes	yes	yes	yes
Asiamah 2021	Short-Term Changes in Behaviors Resulting from COVID-19-Related Social Isolation and Their Influences on Mental Health in Ghana.	This study assessed the behavioral outcomes of Coronavirus 2019 (COVID-19) social distancing protocols and their influences on mental health. An online survey hosted by Survey Monkey was utilized to collect data from residents of three Ghanaian cities of Accra, Kumasi and Tamale. A total of 621 surveys were analyzed, with a sensitivity analysis utilized to select covariates for the regression mod…	Community Mental Health Journal	2020-10-08	https://doi.org/10.1007/s10597-020-00722-4	Ghana	Ghana	621		2020-04-04	2020-04-16	75	19	only during	during the pandemic: less or more	self-report	general population	adults	convenience sample		after	yes	no	yes	yes	yes
Bertagnin 2021	Remote monitoring for heart failure management during COVID-19 pandemic.	Background: COVID-19 pandemic impacted on heart failure patients' lifestyle and quality of life, affecting both physical activity levels and state of health. Methods: Demographic data and device records were extracted for patients with heart failure in the 16weeks at the turn of lockdown during pandemic. To explore the variability across the lockdown period, a week-to-week analysis was performed.…	International Journal of Cardiology. Heart & Vasculature	2021-01-28	https://doi.org/10.1016/j.ijcha.2021.100724	Italy	Italy	211	68.6	2020-03-09	2020-05-03	79.25	38	before and during	before and during the pandemic (within-subject)	objective measures	patients	adults	convenience sample			yes	yes	yes	yes	sufficient with concerns
Malanchini 2020	Impact of the Coronavirus Disease-19 Outbreak on Physical Activity of Patients With Implantable Cardioverter Defibrillators.		Journal of Cardiac Failure	2020-08-19	https://doi.org/10.1016/j.cardfail.2020.08.005	Italy	Italy	184	67	2020-03-09	2020-04-06	74.85	38	before and during	before and during the pandemic (within-subject)	objective measures	patients	seniors	convenience sample			yes	yes	yes	yes	sufficient with concerns
Yang 2020	Determinants of physical activity maintenance during the Covid-19 pandemic: a focus on fitness apps.	There are various health benefits of regular physical activity (PA) and health risks of sedentariness. The Covid-19 pandemic may have decreased PA and increased sedentariness for several reasons (e.g., closure of gyms, family-related time constraints, and reduced outdoor mobility). Yet, to date, there are no longitudinal studies that examined whether the pandemic affects PA levels and what factor…	Translational Behavioral Medicine	2020-09-14	https://doi.org/10.1093/tbm/ibaa086	Germany	USA	431	39.1					before and during	before and during the pandemic (within-subject)	self-report	general population	adults	convenience sample	International Physical Activity Questionnaire		yes	yes	yes	yes	yes
deMatos 2020	The Impact of Measures Recommended by the Government to Limit the Spread of Coronavirus (COVID-19) on Physical Activity Levels, Quality of Life, and Mental Health of Brazilians	To reduce transmission of the coronavirus, the Brazilian government adopted containment measures to control the virus' spread, including limitations to the practice of physical activity. It was aimed to analyze the effects of COVID-19 quarantine on physical activity levels, energy expenditure, quality of life, and level of stress in a sample of the Brazilian population. The sample included 426 pa…	Sustainability	2020-10-31	https://doi.org/10.3390/su12219072	Brazil	Brazil	426		2020-06-12	2020-07-12	73.91	92	only during	during the pandemic and recollect before (within-subject)	self-report	general population	adults	convenience sample	International Physical Activity Questionnaire	after	yes	sufficient with concerns	yes	no	no
Facer-Childs 2021	Sleep and mental health in athletes during COVID-19 lockdown.	The global coronavirus 19 (COVID-19) pandemic and associated lockdown restrictions resulted in the majority of sports competitions around the world being put on hold. This includes the National Basketball Association, the UEFA Champions League, Australian Football League, the Tokyo 2020 Olympic Games, and regional competitions. The mitigation strategies in place to control the pandemic have cause…	Sleep	2021-02-04	https://doi.org/10.1093/sleep/zsaa261	Australia	Australia	399	26.5	2020-05-01	2020-06-01	61.9	90	only during	during the pandemic and recollect before (within-subject)	self-report	athletes/exercisers	adults	convenience sample	Athlete Chronometric Evaluation	before	yes	yes	yes	yes	sufficient with concerns
McGrath 2020	The impact of the COVID-19 pandemic on the wellbeing of Irish Men's Shed members.	COVID-19 disproportionately affects males especially those who are older and more socio-economically disadvantaged. This study assessed wellbeing outcomes among men's shed members (Shedders) in Ireland at baseline (T1), 3 (T2), 6 (T3) and 12months (T4) in response to a 10-week health promotion program 'Sheds for Life' (SFL). Two cohorts participated in SFL commencing in March and September 2019. …	Health Promotion International	2020-12-03	https://doi.org/10.1093/heapro/daaa113	Ireland	Ireland	383	69					before and during	before and during the pandemic (between-subject)	self-report	general population	adults	convenience sample			yes	yes	yes	yes	yes
Geng 2021	The influence of risk perception for COVID-19 pandemic on posttraumatic stress disorder in healthcare workers: A survey from four designated hospitals		Clinical Psychology & psychotherapy	2021-02-16	https://doi.org/10.1002/cpp.2564	China	China	317		2020-06-04	2020-06-18	73.4	134	only during	during the pandemic: less or more	self-report	general population	adults	convenience sample		before	yes	sufficient with concerns	yes	yes	sufficient with concerns
Carroll 2020	The Impact of COVID-19 on Health Behavior, Stress, Financial and Food Security among Middle to High Income Canadian Families with Young Children.	The COVID-19 pandemic has disrupted many aspects of daily life. The purpose of this study was to identify how health behaviors, level of stress, financial and food security have been impacted by the pandemic among Canadian families with young children. Parents (mothers, n = 235 and fathers, n = 126) from 254 families participating in an ongoing study completed an online survey that included close…	Nutrients	2020-08-07	https://doi.org/10.3390/nu12082352	Canada	Canada	254		2020-04-20	2020-05-15	60.01	39	only during	during the pandemic: less or more	self-report	general population	adults	convenience sample	International Physical Activity Questionnaire	before	yes	yes	yes	sufficient with concerns	no
Hanke 2020	Influence of Officially Ordered Restrictions During the First Wave of COVID-19 Pandemic on Physical Activity and Quality of Life in Patients after Kidney Transplantation in a Telemedicine Based Aftercare Program-A KTx360° Sub Study.	Guidelines recommend a healthy lifestyle and regularly physical activity (PA) after kidney transplantation (KTx). The KTx360° program is a multicenter, multisectoral, multimodal, telemedicine-based follow-up care program. Effects of the first COVID-19 wave restrictions on health-related quality of life and PA of supervised KTx360° patients were evaluated using an online questionnaire. Six hundred…	International Journal of Environmental Research and Public Health	2020-12-07	https://doi.org/10.3390/ijerph17239144	Germany	Germany	248	54.86	2020-05-01	2020-05-31	59.58	65	before and during	before and during the pandemic (within-subject)	self-report	patients	adults	convenience sample	Freiburg Questionnaire of Physical Activity	after	yes	yes	yes	yes	yes
Guilherme 2020	PERCEPTIVE CHANGES IN ENDURANCE ATHLETES DURING SOCIAL ISOLATION DUE TO COVID-19	Introduction:The COVID-19 pandemic has led to social isolation measures in different contexts. In endurance sports, competitions worldwide have been canceled, affecting behavioral, psychological, and physical aspects. Objective: This study aimed to assess potential associations between stress, motivation, behavioral changes, and physical fitness in endurance athletes, and time in social isolation…	Revista Brasileira De Medicina Do Esporte	2020-12-11	https://doi.org/10.1590/1517-8692202026062020_072	Brazil	Brazil	201	39.94	2020-07-03	2020-07-06	75.64	113	only during	during the pandemic: less or more	self-report	athletes/exercisers	adults	convenience sample		after	yes	yes	yes	yes	no
Suzuki 2020	Physical Activity Changes and Its Risk Factors among Community-Dwelling Japanese Older Adults during the COVID-19 Epidemic: Associations with Subjective Well-Being and Health-Related Quality of Life.	Psychological distress caused by decreased physical activity (PA) is a growing concern among the elderly due to public health measures since the coronavirus disease (COVID-19). We aimed to (1) assess how public health restrictions impact PA, subjective well-being (SWB), and health-related quality of life (HRQoL) of community-dwelling elderly, and (2) investigate risk factors that lead to a declin…	International Journal of Environmental Research and Public Health	2020-09-10	https://doi.org/10.3390/ijerph17186591	Japan	Japan	165	78.6	2020-04-16	2020-05-29	38.84	56	only during	during the pandemic and recollect before (within-subject)	self-report	patients	seniors	convenience sample	Physical Activity Questionnaire	during	yes	yes	yes	yes	yes
Martínez-de-QuelÓ 2021	Physical activity, dietary habits and sleep quality before and during COVID-19 lockdown: A longitudinal study.	The COVID-19 pandemic has forced the health public authorities to impose a lockdown as an epidemiological containment strategy. This study aimed to provide information regarding the impact of the mandatory confinement on the physical activity, eating disorders risk, sleep quality and well-being on a Spanish sample. An online survey that included the Minnesota Leisure Time Physical Activity Questi…	Appetite	2020-11-05	https://doi.org/10.1016/j.appet.2020.105019	Spain	Spain	161	35	2020-03-16	2020-05-11	63.56	7	only during	during the pandemic and recollect before (within-subject)	self-report	general population	adults	convenience sample	Minnesota Leisure Time Physical Activity Questionnaire	before	yes	yes	yes	yes	yes
Hemphill 2020	Reduced Physical Activity During COVID-19 Pandemic in Children With Congenital Heart Disease.	Children with congenital heart disease (CHD) are at risk for both COVID-19 and secondary cardiovascular outcomes. Their increased cardiovascular risk may be mitigated through physical activity, but public health measures implemented for COVID-19 can make physical activity challenging. We objectively measured the impact of the COVID-19 pandemic on physical activity, continuously measured by Fitbit…	The Canadian Journal of Cardiology	2020-05-05	https://doi.org/10.1016/j.cjca.2020.04.038	Canada	Canada	109	13.2	2020-01-01	2020-04-05	18.7	-71	before and during	before and during the pandemic (within-subject)	objective measures	patients	children	convenience sample			yes	yes	yes	yes	yes
Okely 2021	Change in Physical Activity, Sleep Quality, and Psychosocial Variables during COVID-19 Lockdown: Evidence from the Lothian Birth Cohort 1936	(1) Objectives: The COVID-19 pandemic has disproportionately affected the lives of older people. In this study, we examine changes in physical activity, sleep quality, and psychosocial variables among older people during COVID-19 lockdown. We build on cross-sectional studies on this topic by assessing change longitudinally. We also examined whether participant characteristics including demographi…	International Journal of Environmental Research and Public Health	2020-12-30	https://doi.org/10.3390/ijerph18010210	UK	UK	137	79	2020-05-27	2020-06-08	60.08	70	before and during	before and during the pandemic (between-subject)	self-report	general population	seniors	convenience sample		before	yes	yes	yes	yes	yes
Sivevska 2020	OPPINIONS OF STUDENTS FOR THEIR SPORT ACTIVITY DURING COVID-19 PANDEMIC - CASE OF STUDENTS FROM TEACHING FACULTY IN STIP	The COVID-19 pandemic changed our lives affecting all areas of living. Education, teaching, our movement habits, including our hobbies and leisure time activities has been changed. Changes occurs for everyday habits of university students and young people as well. This study was designed with aim to determine changes that occurs in students sport activity during leisure in period of pandemic, com…	Pedagogika-Pedagogy	2021-02-01		Republic of North Macedonia	Republic of North Macedonia	119		2020-05-01	2020-06-30			only during	during the pandemic and recollect before (within-subject)	self-report	general population	adults	convenience sample			yes	no	yes	sufficient with concerns	no
Puccinelli 2021	Physical Activity Levels and Mental Health during the COVID-19 Pandemic: Preliminary Results of a Comparative Study between Convenience Samples from Brazil and Switzerland.	Background and objectives: It has been suggested that the COVID-19 pandemic impaired people's moods and general levels of physical activity, but the way in which each country is coping with the situation may result in different outcomes. The aim of the present study was to compare the mental health and physical activity levels between residents of Brazil and Switzerland during the social distanci…	Medicina (Kaunas, Lithuania)	2021-01-08	https://doi.org/10.3390/medicina57010048	Brazil	Multinational	114	55	2020-06-02	2020-06-12			only during	during the pandemic and recollect before (within-subject)	self-report	general population	adults	convenience sample	International Physical Activity Questionnaire		yes	sufficient with concerns	yes	sufficient with concerns	no
Medrano 2020	Changes in lifestyle behaviours during theCOVID-19 confinement in Spanish children: A longitudinal analysis from theMUGIproject	Background Home confinement during the COVID-19 pandemic could have affected lifestyle behaviours of children, however evidence about it is emerging and yet scarce. Objectives To examine the effects of the COVID-19 confinement on lifestyle behaviours in Spanish children, and to assess the influence of social vulnerabilities on changes in lifestyle behaviours. Methods Physical activity (PA), scree…	Pediatric Obesity	2020-09-24	https://doi.org/10.1111/ijpo.12731	Spain	Spain	113	12	2020-03-01	2020-04-30	53.86	-8	before and during	before and during the pandemic (within-subject)	self-report	general population	children	convenience sample	Youth Activity Profile	before	yes	yes	yes	yes	sufficient with concerns
YildizKabak 2021	Screening supportive care needs, compliance with exercise program, quality of life, and anxiety level during the COVID-19 pandemic in individuals treated with hematopoietic stem cell transplantation	Purpose The primary aim was to assess supportive care needs, compliance with home exercise program, quality of life level (QOL), and anxiety level during the COVID-19 pandemic in individuals treated with hematopoietic stem cell transplantation (HSCT). The secondary aim was to investigate demographic and medical factors associated with the recorded outcomes. Methods The present study included indi…	Supportive Care in Cancer	2021-01-06	https://doi.org/10.1007/s00520-020-05965-1	Turkey	Turkey	101	50.83					before and during	before and during the pandemic (within-subject)	self-report	patients	adults	convenience sample			yes	yes	yes	yes	yes
Song 2020	The changes of exercise pattern and clinical symptoms in patients with Parkinson's disease in the era of COVID-19 pandemic.	INTRODUCTION: The coronavirus disease 2019 (COVID-19) pandemic has disrupted everyday life of Parkinson's disease (PD) patients, but its clinical impact has not been illustrated. In this study, we investigated the change in physical activity and subsequently clinical symptoms of PD during the COVID-19 pandemic. METHODS: We enrolled PD patients who were able to ambulate independently and had visit…	Parkinsonism & Related Disorders	2020-09-23	https://doi.org/10.1016/j.parkreldis.2020.09.034	Republic of South Korea	Republic of South Korea	100	70					before and during	before and during the pandemic (within-subject)	self-report	patients	seniors	convenience sample	Physical Activity Scale of the Elderly Questionnaire		yes	yes	yes	yes	yes
Pérez 2021	Depressive Symptoms, Fatigue and Social Relationships Influenced Physical Activity in Frail Older Community-Dwellers during the Spanish Lockdown due to the COVID-19 Pandemic.	Due to the dramatic impact of the COVID-19 pandemic, Spain underwent a strict lockdown (March-May 2020). How the lockdown modified older adults' physical activity (PA) has been poorly described. This research assesses the effect of the lockdown on PA levels and identifies predictors of sufficient/insufficient PA in frail older community-dwellers. Community-dwelling participants from the +ÀGIL Bar…	International Journal of Environmental Research and Public Health	2021-01-19	https://doi.org/10.3390/ijerph18020808	Spain	Spain	98	82.4					before and during	before and during the pandemic (within-subject)	self-report	patients	seniors	convenience sample	Brief Physical Activity Assessment Tool		sufficient with concerns	yes	yes	yes	yes
Karuc 2020	Moderators of Change in Physical Activity Levels during Restrictions Due to COVID-19 Pandemic in Young Urban Adults	This study aimed to investigate moderators of change in physical activity (PA) levels after 30 days (30-d) of restrictions due to the COVID-19 pandemic in young adults. This research is an extension of the CRO-PALS study and analyses for this study were performed on young adults (20-21 y.o., n = 91). Moderate-to-vigorous physical activity (MVPA), sport participation, student and socioeconomic sta…	Sustainability	2020-08-08	https://doi.org/10.3390/su12166392	Croatia	Croatia	91	21.56	2020-04-24	2020-05-08	76.75	45	only during	during the pandemic: less or more	self-report	general population	adults	convenience sample	School Health Action, Planning and Evaluation System Questionnaire	after	yes	sufficient with concerns	yes	yes	no
Curtis 2021	Changes in diet, activity, weight, and wellbeing of parents during COVID-19 lockdown	The COVID-19 pandemic has dramatically impacted lifestyle behaviour as public health initiatives aim to “flatten the curve”. This study examined changes in activity patterns (physical activity, sedentary time, sleep), recreational physical activities, diet, weight and wellbeing from before to during COVID-19 restrictions in Adelaide, Australia. This study used data from a prospective cohort of Au…	PloS one	2021-03-03	https://doi.org/10.1371/journal.pone.0248008	Australia	Australia	55	41	2020-02-01	2020-04-30	40.43	0	before and during	before and during the pandemic (within-subject)	objective measures	general population	adults	convenience sample			yes	yes	yes	yes	yes
Gurgel 2021	Determinants of Health and Physical Activity Levels Among Breast Cancer Survivors During the COVID-19 Pandemic: A Cross-Sectional Study.	Background: Increased exercise and physical activity levels are recommended throughout cancer therapy and survivorship. Nonetheless, the COVID-19 pandemic and consequent social distancing are likely to cause a decline in physical activity. Objective: to evaluate the level of unsupervised physical activity of breast cancer survivors during the COVID-19 pandemic, and the factors associated with dif…	Frontiers in Physiology	2021-02-05	https://doi.org/10.3389/fphys.2021.624169	Brazil	Brazil	37	57	2020-09-01	2020-09-30	68.4	173	only during	during the pandemic and recollect before (within-subject)	self-report	patients	adults	convenience sample	Minnesota Leisure Time Physical Activity Questionnaire	after	yes	yes	yes	yes	no
Niela-Vilén 2021	Pregnant women's daily patterns of well-being before and during the COVID-19 pandemic in Finland: Longitudinal monitoring through smartwatch technology.	BACKGROUND: Technology enables the continuous monitoring of personal health parameter data during pregnancy regardless of the disruption of normal daily life patterns. Our research group has established a project investigating the usefulness of an Internet of Things-based system and smartwatch technology for monitoring women during pregnancy to explore variations in stress, physical activity and …	PloS one	2021-02-03	https://doi.org/10.1371/journal.pone.0246494	Finland	Finland	38	31.4	2020-02-12	2020-04-08	31.49	-29	before and during	before and during the pandemic (within-subject)	objective measures	general population	adults	convenience sample			yes	yes	yes	yes	sufficient with concerns
AlarconMeza 2021	Physical activity in university student athletes, prior and in confinement due to pandemic associated with COVID-19	Objective: To compare the levels of physical activity in university athletes before and during the confinement due to pandemic associated with COVID-19. Method: thirty-two university student athletes enrolled in the Sports Faculty of the Autonomous University of Baja California. The average age of the participating subjects was 21.4 +/- 3.6 years (17 men and 15 women). To assess the physical acti…	Retos: Nuevas Tendencias en Educación Física, Deportes y Recreación	2020-09-28	https://doi.org/10.47197/retos.v0i39.81293	Mexico	Mexico	32	21.4					only during	during the pandemic and recollect before (within-subject)	self-report	athletes/exercisers	adults	convenience sample	International Physical Activity Questionnaire		yes	no	yes	no	no
Browne 2021	Housing type is associated with objectively measured changes in movement behavior during the COVID-19 pandemic in older adults with hypertension: An exploratory study.	PURPOSE: To investigate the association between housing characteristics with objectively measured changes in physical activity (PA) and sedentary behavior (SB) during the COVID-19 pandemic in older adults with hypertension. METHODS: Thirty-five older adults with hypertension were included in this exploratory study. Accelerometer-based PA and SB measures were assessed before and during a period of…	Archives of Gerontology and Geriatrics	2021-01-27	https://doi.org/10.1016/j.archger.2021.104354	Brazil	Brazil	35	65.6					before and during	before and during the pandemic (within-subject)	objective measures	patients	seniors	convenience sample			yes	yes	yes	yes	sufficient with concerns
BrowneRAV 2020	Initial impact of the COVID-19 pandemic on physical activity and sedentary behavior in hypertensive older adults: An accelerometer-based analysis.	BACKGROUND: This study reports the accelerometer-based physical activity (PA) and sedentary behavior (SB) before and during the COVID-19 pandemic in hypertensive older adults. METHODS: Thirty-five hypertensive older adults were included in this observational study. Accelerometer-based PA and SB measures were assessed before (January to March 2020) and during (June 2020) the COVID-19 pandemic. Lin…	Experimental Gerontology	2020-10-22	https://doi.org/10.1016/j.exger.2020.111121	Brazil	Brazil	35	65.6	2020-06-01	2020-06-30	73.08	81	before and during	before and during the pandemic (within-subject)	objective measures	patients	seniors	convenience sample			yes	yes	yes	yes	yes
Vetrovsky 2020	The detrimental effect of COVID-19 nationwide quarantine on accelerometer-assessed physical activity of heart failure patients.	AIMS: A reduction of habitual physical activity due to prolonged COVID-19 quarantine can have serious consequences for patients with cardiovascular diseases, such as heart failure. This study aimed to explore the effect of COVID-19 nationwide quarantine on accelerometer-assessed physical activity of heart failure patients. METHODS AND RESULTS: We analysed the daily number of steps in 26 heart fai…	ESC Heart Failure	2020-07-22	https://doi.org/10.1002/ehf2.12916	Czech Republic	Czech Republic	26	58.8	2020-03-16	2020-04-05	72.01	15	before and during	before and during the pandemic (within-subject)	objective measures	patients	adults	convenience sample			yes	yes	yes	yes	sufficient with concerns
Sassone 2020	Impact of COVID-19 Pandemic on Physical Activity in Patients With Implantable Cardioverter-Defibrillators.	PURPOSE: The coronavirus disease-2019 (COVID-19) pandemic has been spreading rapidly worldwide since late January 2020. The strict lockdown strategy prompted by the Italian government, to hamper severe acute respiratory syndrome coronavirus 2 (SARS-CoV2) spreading, has reduced the possibility of performing either outdoor or gym physical activity (PA). This study investigated and quantified the re…	Journal of Cardiopulmonary Rehabilitation and Prevention	2020-09-01	https://doi.org/10.1097/HCR.0000000000000539	Italy	Italy	24	72					before and during	before and during the pandemic (within-subject)	objective measures	patients	seniors	convenience sample			yes	sufficient with concerns	yes	sufficient with concerns	sufficient with concerns
Alonso-Martínez 2021	Physical Activity, Sedentary Behavior, Sleep and Self-Regulation in Spanish Preschoolers during the COVID-19 Lockdown.	BACKGROUND: A better understanding of the effects of the lockdown on lifestyle behaviors may help to guide the public health response to COVID-19 at a national level and to update the global strategy to respond COVID-19 pandemic. The aim of the study was to examine the effects of the COVID-19 lockdown on device-measured physical activity (PA), sedentary time, sleep and self-regulation; and to det…	International Journal of Environmental Research and Public Health	2021-01-15	https://doi.org/10.3390/ijerph18020693	Spain	Spain	21	4.29	2020-03-01	2020-04-30	53.86	-8	before and during	before and during the pandemic (within-subject)	objective measures	general population	children	convenience sample			yes	sufficient with concerns	yes	yes	sufficient with concerns
Michael 2020	Trends in Physical Activity and Sleep Quality in IBD Patients Measured with Wearable Biosensors During the COVID-19 Pandemic		The American Journal of Gastroenterology	2020-12-10	https://doi.org/10.14309/01.ajg.0000722988.95725.50	USA	USA	16		2020-03-21	2020-03-29	62.82	16	before and during	before and during the pandemic (within-subject)	objective measures	patients	adults	convenience sample			yes	sufficient with concerns	yes	yes	yes
Breuls 2020	Late Breaking Abstract - Physical activity in lung transplant recipients during Belgian COVID-19 lockdown		The European Respiratory Journal	2020-10-28	https://doi.org/10.1183/13993003.congress-2020.4108	Belgium	Belgium	16	61					before and during	before and during the pandemic (within-subject)	objective measures	patients	adults	convenience sample			yes	yes	yes	sufficient with concerns	sufficient with concerns
Zinner 2020	The Impact of the German Strategy for Containment of Coronavirus SARS-CoV-2 on Training Characteristics, Physical Activity and Sleep of Highly Trained Kayakers and Canoeists: A Retrospective Observational Study.	Aim: To characterize the impact of the German strategy for containment of Coronavirus SARS-CoV-2 (social distancing and lockdown) on the training, other habitual physical activity, and sleep in highly trained kayakers and canoeists. Method: During the 4 weeks immediately prior to and following the beginning of the German government's strategy for containment of Coronavirus SARS-CoV-2 on March 23,…	Frontiers in Sports and Active Living	2020-10-15	https://doi.org/10.3389/fspor.2020.579830	Germany	Germany	14	17.1	2020-02-24	2020-04-20	47.14	-2	before and during	before and during the pandemic (within-subject)	objective measures	athletes/exercisers	adults	convenience sample			yes	yes	yes	yes	yes
Pinelli 2021	Effects of COVID-19 Lockdown on Adherence to Individual Home- or Gym-Based Exercise Training among Women with Postmenopausal Osteoporosis	Objective. The outbreak of severe acute respiratory syndrome coronavirus 2 (SARS-Cov-2) and its associated illness, coronavirus disease 2019 (COVID-19), has led to a global health crisis burdening frontline emergency departments, including orthopedic and trauma units. The aim of this study was to provide an overview of the impact of the lockdown secondary to the pandemic on patient numbers and pa…	International Journal of Environmental Research and Public Health	2021-03-02	https://doi.org/10.3390/ijerph18052441	Italy	Italy	43	65.3	2020-03-09	2020-05-18	75.93	38	before and during	before and during the pandemic (within-subject)	self-report	patients	adults	convenience sample		during	yes	yes	yes	yes	yes
Tolani 2021	Understanding Changes in Physical Activity among Lower Limb Prosthesis Users: A COVID-19 Case Series		PM & R : The Journal of Injury, Function, and Rehabilitation	2020-10-08	https://doi.org/10.1002/pmrj.12508	USA	USA	3						before and during	before and during the pandemic (within-subject)	objective measures	patients	adults	convenience sample			sufficient with concerns	sufficient with concerns	yes	sufficient with concerns	no
Sugand 2020	Impact of the COVID-19 pandemic on paediatric orthopaedic trauma workload in central London: a multi-centre longitudinal observational study over the "golden weeks".	Background and purpose - The COVID-19 pandemic has been recognised as an unprecedented global health crisis. This study assesses the impact on a large acute paediatric hospital service in London, evaluating the trends in the acute paediatric orthopaedic trauma referral caseload and operative casemix before (2019) and during (2020) COVID-19 lockdown. Patients and methods - A longitudinal retrospec…	Acta Orthopaedica	2020-08-24	https://doi.org/10.1080/17453674.2020.1807092	UK	UK							before and during	before and during the pandemic (between-subject)	injury study	injury patients	children	defined sample			yes	yes	yes	yes	yes
Doubleday 2021	How did outdoor biking and walking change during COVID-19?: A case study of three U.S. cities.	A growing body of literature suggests that restrictive public health measures implemented to control COVID-19 have had negative impacts on physical activity. We examined how Stay Home orders in Houston, New York City, and Seattle impacted outdoor physical activity patterns, measured by daily bicycle and pedestrian count data. We assessed changes in activity levels between the period before and du…	PloS one	2021-01-20	https://doi.org/10.1371/journal.pone.0245514	USA	USA							before and during	before and during the pandemic (between-subject)	objective measures	general population	adults	defined sample			yes	yes	yes	yes	yes
Maniscalco 2020	The impact of COVID-19 pandemic on the Emergency Room and Orthopedic Departments in Piacenza: a retrospective analysis.	INTRODUCTION AND AIM: The Coronavirus pandemic represents one of the most massive health emergencies in the last century. Aim of the study is to evaluate the trend of E.R. accesses and orthopaedic events during the pandemic of Covid-19. MATERIALS AND METHODS: we retrospectively analysed all data related to patients admitted to the E.R. Department of the Hospital of Piacenza from August 26th 2019 …	Acta Bio Medica : Atenei Parmensis	2020-12-30	https://doi.org/10.23750/abm.v91i14-S.11003	Italy	Italy							before and during	before and during the pandemic (between-subject)	injury study	injury patients	adults	defined sample			yes	no	yes	yes	no
Keays 2020	Injuries in the time of COVID-19.	INTRODUCTION: Research has shown that during the 2003 SARS pandemic, emergency department (ED) visits among the pediatric population decreased. We set out to investigate if this was also true for injury-related ED visits during the COVID-19 pandemic. METHODS: Using data from the Canadian Hospitals Injury Reporting and Prevention Program (CHIRPP), we looked at 28 years of injury-related ED visits …	Health Promotion and Chronic Disease Prevention in Canada : Research, Policy and Practice	2020-09-11	https://doi.org/10.24095/hpcdp.40.11/12.02	Canada	Canada							before and during	before and during the pandemic (between-subject)	injury study	injury patients	children	defined sample			yes	sufficient with concerns	yes	sufficient with concerns	sufficient with concerns
Probert 2021	Impact of COVID-19-related social restrictions on orthopaedic trauma in a level 1 trauma centre in Sydney: the first wave.	BACKGROUND: The coronavirus disease 2019 (COVID-19) pandemic has affected communities worldwide. This study examines the impact that public health measures to control viral spread have had on orthopaedic trauma presenting to an Australian level 1 trauma centre. We hypothesized that the volume of orthopaedic trauma in the period of social distancing would decrease, and the mechanisms of injury dif…	ANZ Journal of Surgery	2020-10-13	https://doi.org/10.1111/ans.16375	Australia	Australia							before and during	before and during the pandemic (between-subject)	injury study	injury patients	adults	defined sample			yes	yes	yes	yes	sufficient with concerns
Baxter 2020	Paediatric orthopaedics in lockdown: A study on the effect of the SARS-Cov-2 pandemic on acute paediatric orthopaedics and trauma.	Aims: To determine the impact of COVID-19 on orthopaediatric admissions and fracture clinics within a regional integrated care system (ICS). Methods: A retrospective review was performed for all paediatric orthopaedic patients admitted across the region during the recent lockdown period (24 March 2020 to 10 May 2020) and the same period in 2019. Age, sex, mechanism, anatomical region, and treatme…	Bone & Joint Open	2020-07-17	https://doi.org/10.1302/2633-1462.17.BJO-2020-0086.R1	UK	UK							before and during	before and during the pandemic (between-subject)	injury study	injury patients	children	defined sample			yes	yes	yes	yes	yes
Pinggera 2020	The influence of the COVID-19 pandemic on traumatic brain injuries in Tyrol: experiences from a state under lockdown	Purpose In February 2020, the federal state of Tyrol in Austria has become one of the epicenters of the COVID-19 pandemic. Tyrol is known for numerous skiing areas. Thus, winter sport resorts became a starting point for COVID-19 infections spreading towards the rest of the state, Austria and other countries, leading to a mandatory quarantine for almost a million people, who were placed under a cu…	European Journal of Trauma and Emergency Surgery	2020-07-22	https://doi.org/10.1007/s00068-020-01445-7	Austria	Austria							before and during	before and during the pandemic (between-subject)	injury study	injury patients	adults	defined sample			yes	yes	yes	yes	yes
Fahy 2020	Analysing the variation in volume and nature of trauma presentations during COVID-19 lockdown in Ireland.	Aims: Europe has found itself at the epicentre of the COVID-19 pandemic. Naturally, this has placed added strain onto healthcare systems internationally. It was feared that the impact of the COVID-19 pandemic could overrun the Irish healthcare system. As such, the Irish government opted to introduce a national lockdown on the 27 March 2020 in an attempt to stem the flow of admissions to hospitals…	Bone & Joint Open	2020-06-12	https://doi.org/10.1302/2046-3758.16.BJO-2020-0040.R1	Ireland	Ireland							before and during	before and during the pandemic (between-subject)	injury study	injury patients	adults	defined sample			yes	yes	yes	yes	yes
Scott 2020	Population mobility and adult orthopaedic trauma services during the COVID-19 pandemic: fragility fracture provision remains a priority.	Aims: This study aims to define the epidemiology of trauma presenting to a single centre providing all orthopaedic trauma care for a population of 900,000 over the first 40 days of the COVID-19 pandemic compared to that presenting over the same period one year earlier. The secondary aim was to compare this with population mobility data obtained from Google. Methods: A cross-sectional study of con…	Bone & Joint Open	2020-06-02	https://doi.org/10.1302/2633-1462.16.BJO-2020-0043.R1	UK	UK							before and during	before and during the pandemic (between-subject)	injury study	injury patients	adults	defined sample			yes	yes	yes	yes	yes
Donovan 2020	Outcomes of Orthopaedic Trauma Services at a UK Major Trauma Centre During a National Lockdown and Pandemic: The Need for Continuing the Provision of Services	Aim To review the trauma operating workload, theatre time and outcomes at a time of national lockdown at the beginning of the coronavirus disease 2019 (COVID-19) pandemic, comparing it with a year prior. Methods A retrospective case-control study was performed in a single Level 1 Major Trauma Centre (MTC) in the UK. Inclusion criteria were all patients undergoing operative intervention for an eme…	Curēus	2020-10-20	https://doi.org/10.7759/cureus.11056	UK	UK							before and during	before and during the pandemic (between-subject)	injury study	injury patients	adults	defined sample			yes	yes	yes	yes	yes
Raitio 2020	Reduced Number of Pediatric Orthopedic Trauma Requiring Operative Treatment during COVID-19 Restrictions: A Nationwide Cohort Study	Background and Aims: The coronavirus outbreak significantly changed the need of healthcare services. We hypothesized that the COVID-19 pandemic decreased the frequency of pediatric fracture operations. We also hypothesized that the frequency of emergency pediatric surgical operations decreased as well, as a result of patient-related reasons, such as neglecting or underestimating the symptoms, to …	Scandinavian Journal of Surgery	2020-10-26	https://doi.org/10.1177/1457496920968014	Finland	Finland							before and during	before and during the pandemic (between-subject)	injury study	injury patients	children	defined sample			yes	sufficient with concerns	yes	yes	yes
Heo 2020	Relationships between Local Green Space and Human Mobility Patterns during COVID-19 for Maryland and California, USA	Human mobility is a significant factor for disease transmission. Little is known about how the environment influences mobility during a pandemic. The aim of this study was to investigate an effect of green space on mobility reductions during the early stage of the COVID-19 pandemic in Maryland and California, USA. For 230 minor civil divisions (MCD) in Maryland and 341 census county divisions (CC…	Sustainability	2020-11-12	https://doi.org/10.3390/su12229401	USA	USA			2020-03-11	2020-04-26	60.46	6	before and during	before and during the pandemic (within-subject)	objective measures	general population	adults	convenience sample			yes	yes	yes	yes	yes
Dolci 2020	The Epidemiology of Fractures and Muskulo-Skeletal Traumas During COVID-19 Lockdown: A Detailed Survey of 17.591 Patients in a Wide Italian Metropolitan Area	Introduction: On 9 March 2020 the Italian Government declared a national lockdown to curb the spread of Covid-19. The aim of our study was to analyze the effects of such intervention on the traumatological emergency service, with particular emphasis on variations in trauma incidence and patients' characteristics. Materials and Methods: An observational analysis was performed. Medical records were…	Geriatric Orthopaedic Surgery & Rehabilitation	2020-11-11	https://doi.org/10.1177/2151459320972673	Italy	Italy							before and during	before and during the pandemic (between-subject)	injury study	injury patients	adults	defined sample			yes	yes	yes	yes	sufficient with concerns
Salzano 2020	Have There Been any Changes in the Epidemiology and Etiology of Maxillofacial Trauma During the COVID-19 Pandemic? An Italian Multicenter Study.	Severe acute respiratory syndrome coronavirus 2 (SARS-CoV-2) has had a significant impact on people's behavior. The aim of this study has been to evaluate how the SARS-CoV-2 pandemic has impacted the incidence and the features of maxillofacial fractures presented at 6 Italian tertiary centers. Clinical records of all the patients diagnosed for facial fractures between February 23 and May 23, 2019…	The Journal of Craniofacial Surgery	2020-11-19	https://doi.org/10.1097/SCS.0000000000007253	USA	Italy							before and during	before and during the pandemic (between-subject)	injury study	injury patients	adults	defined sample			yes	yes	yes	sufficient with concerns	sufficient with concerns
Bizzoca 2020	Orthopedic and trauma care during COVID-19 lockdown in Apulia: what the pandemic could not change	BACKGROUND: This study aimed to evaluate the impact of COVID-19 lockdown on Orthopedic and Trauma Care in Apulia, using as a reference point the orthopedic activity performed in the previous three years in the same bimester, and to assess any relationship between the COVID-19 spreading in Apulia and changes in orthopedic and trauma working activity. METHODS: Eight Apulian level 1 or level 2 ortho…	Minerva Ortopedica E Traumatologica	2020-12-01	https://doi.org/10.23736/S0394-3410.20.04016-3	Italy	Italy							before and during	before and during the pandemic (between-subject)	injury study	injury patients	adults	defined sample			yes	sufficient with concerns	yes	yes	yes
Saponaro 2020	Influence of Sars-Cov 2 lockdown on the incidence of facial trauma in a tertiary care hospital in Rome, Italy.	OBJECTIVES: Italy has been the first affected country in the western haemisphere by SARS-COV 2 with over 200.000 cases during the first months o the pandemica. To control the spread of the virus, the whole country was placed under lockdown with limitations in the circulation of people and vehicles from March 2020 to the first half of the month of May. MATERIALS AND METHODS: We aimed to analyze th…	Minerva Stomatologica	2020-11-27	https://doi.org/10.23736/S0026-4970.20.04446-5	Italy	Italy							before and during	before and during the pandemic (between-subject)	injury study	injury patients	adults	defined sample			yes	yes	yes	sufficient with concerns	sufficient with concerns
Gumina 2021	The impact of COVID-19 on shoulder and elbow trauma in a skeletally immature population: an Italian survey.	Background: The aim of this study was to evaluate the impact of COVID-19 on the shoulder and elbow trauma in a skeletally immature population in 30 days starting from March 8, 2020, the first day of restrictions in Italy, and to compare it with the same period of2019. Materials and methods: All the skeletally immature (younger than 18 years) patients managed in the emergency unit of our hospital …	JSES International	2020-09-21	https://doi.org/10.1016/j.jseint.2020.08.003	Italy	Italy							before and during	before and during the pandemic (between-subject)	injury study	injury patients	children	defined sample			yes	yes	yes	yes	no
Poggetti 2021	How hand and wrist trauma has changed during covid-19 emergency in Italy: Incidence and distribution of acute injuries. What to learn?	Background: the purpose is to gather and analyze the statistical datas of wrist and hand injuries admitted to the Hand and Reconstructive Microsurgery and Replantation Hub center of Careggi Hospital, Florence during the first two months of COVID-19 epidemic in Italy. The Authors investigated how the drastic changes in daily activities modified the epidemiology of hand trauma lesions. Methods: The…	Journal of Clinical Orthopaedics and Trauma	2020-09-19	https://doi.org/10.1016/j.jcot.2020.08.008	Italy	Italy							before and during	before and during the pandemic (between-subject)	injury study	injury patients	adults	defined sample			yes	sufficient with concerns	yes	sufficient with concerns	no
vanAert 2021	Effect of the COVID-19 pandemic during the first lockdown in the Netherlands on the number of trauma-related admissions, trauma severity and treatment: the results of a retrospective cohort study in a level 2 trauma centre.	OBJECTIVES: To determine the impact of the first lockdown in the Netherlands' measures during the COVID-19 pandemic on the number and type of trauma-related injuries presenting to the emergency department (ED). DESIGN: A single-centre retrospective cohort study. SETTING: A level 2 trauma centre in Breda, The Netherlands. PARTICIPANTS: All patients with trauma seen at the ED between 11 March and 1…	BMJ Open	2021-02-19	https://doi.org/10.1136/bmjopen-2020-045015	Netherlands	Netherlands							before and during	before and during the pandemic (between-subject)	injury study	injury patients	adults	defined sample			yes	yes	yes	yes	yes
Carkci 2021	The Effect of the Coronavirus 2019 (COVID-19) Pandemic on the Number and Characteristics of Orthopedic Trauma Patients in a Tertiary Care Hospital in Istanbul	Objective The aim of this study was to investigate the distribution of the causes of traumatic fractures, types of fractures, and fractures requiring surgery occurred during the one month period following the measures taken by the government due to the COVID-19 pandemic and to compare these data with that of the previous year. Patients and methods The number of patients with fractures, the distri…	Curēus	2021-01-08	https://doi.org/10.7759/cureus.12569	Turkey	Turkey							before and during	before and during the pandemic (between-subject)	injury study	injury patients	adults	defined sample			yes	yes	yes	yes	yes
Sanford 2021	Changes in pediatric trauma during COVID-19 stay-at-home epoch at a tertiary pediatric hospital.	BACKGROUND: Trauma is the leading cause of morbidity and mortality in the pediatric population. However, during the societal disruptions secondary to the coronavirus (COVID-19) stay-at-home regulations, there have been reported changes to the pattern and severity of pediatric trauma. We review our two-institution experience. METHODS: Pediatric trauma emergency department (ED) encounters from the …	Journal of Pediatric Surgery	2021-01-20	https://doi.org/10.1016/j.jpedsurg.2021.01.020	USA	USA							before and during	before and during the pandemic (between-subject)	injury study	injury patients	children	defined sample			yes	yes	yes	yes	sufficient with concerns
Ibrahim 2021	Trampolines injuries are bouncing back.	AIMS: This observational study examines the effect of the COVID-19 pandemic upon the paediatric trauma burden of a district general hospital. We aim to compare the nature and volume of the paediatric trauma during the first 2020 UK lockdown period with the same period in 2019. METHODS: Prospective data was collected from 23 March 2020 to 14 June 2020 and compared with retrospective data collected…	Bone & Joint Open	2021-02-12	https://doi.org/10.1302/2633-1462.22.BJO-2020-0152.R1	UK	UK							before and during	before and during the pandemic (between-subject)	injury study	injury patients	children	defined sample			yes	yes	yes	yes	yes
Bram 2020	Where Have All the Fractures Gone? The Epidemiology of Pediatric Fractures During the COVID-19 Pandemic.	BACKGROUND: During the COVID-19 pandemic, public health measures to encourage social distancing have been implemented, including cancellation of school and organized sports. A resulting change in pediatric fracture epidemiology is expected. This study examines the impact of the COVID-19 pandemic on fracture incidence and characteristics. METHODS: This is a retrospective cohort study comparing acu…	Journal of Pediatric Orthopedics	2020-09-01	https://doi.org/10.1097/BPO.0000000000001600	USA	USA							before and during	before and during the pandemic (between-subject)	injury study	injury patients	children	defined sample			yes	yes	yes	yes	sufficient with concerns
Venter 2020	Urban nature in a time of crisis: recreational use of green space increases during the COVID-19 outbreak in Oslo, Norway	The global response to the COVID-19 pandemic has brought with it significant changes to human mobility patterns and working environments. We aimed to explore how social distancing measures affected recreational use of urban green space during the partial lockdown in Oslo, Norway. Mobile tracking data from thousands of recreationists were used to analyze high resolution spatio-temporal changes in …	Environmental Research Letters	2020-10-06	https://doi.org/10.1088/1748-9326/abb396	Norway	Norway			2020-03-12	2020-03-31	47.98	0	before and during	before and during the pandemic (within-subject)	objective measures	athletes/exercisers	adults	convenience sample			yes	sufficient with concerns	yes	sufficient with concerns	no
Park 2020	Social Distancing and Outdoor Physical Activity During the COVID-19 Outbreak in South Korea: Implications for Physical Distancing Strategies.	The novel coronavirus disease (COVID-19) outbreak has put the entire world in a pandemic situation. In response, strict screening, quarantine protocols, and contact tracing have been conducted in South Korea. The purpose of this study was to examine effects of social distancing on the Public Bicycle Sharing System (PBSS) during the COVID-19 outbreak. We used the PBSS public dataset of Seoul, Sout…	Asia-Pacific Journal of Public Health	2020-07-15	https://doi.org/10.1177/1010539520940929	Republic of South Korea	Republic of South Korea			2020-03-22	2020-03-31	69.87	48	before and during	before and during the pandemic (between-subject)	objective measures	general population	adults	convenience sample			yes	no	yes	no	no
Scheer 2021	The Impact of the COVID-19 Pandemic on Endurance and Ultra-Endurance Running.	Background and objectives: The COVID-19 outbreak has become a major health and economic crisis. The World Health Organization declared it a pandemic in March 2020, and many sporting events were canceled. Materials and Methods: We examined the effects of the COVID-19 pandemic on endurance and ultra-endurance running (UER) and analyzed finishes and events during the COVID-19 pandemic (observation p…	Medicina (Kaunas, Lithuania)	2021-01-09	https://doi.org/10.3390/medicina57010052	France	Multinational			2020-03-01	2020-10-31			before and during	before and during the pandemic (between-subject)	objective measures	athletes/exercisers	adults	convenience sample			yes	yes	yes	yes	no
Gumina 2020	The impact of COVID-19 on shoulder and elbow trauma: an Italian survey.	BACKGROUND: Because of the rapid spread of COVID-19, on March 8, 2020 Italy became a "protected area": people were told not to leave their homes unless it was essential. The aim of this study was to evaluate the activity of our trauma center, relative to shoulder and elbow, in the 30 days starting from March 8, 2020, the first day of restrictions in Italy, and to compare it with the same days of …	Journal of Shoulder and Elbow Surgery	2020-05-19	https://doi.org/10.1016/j.jse.2020.05.003	Italy	Italy							before and during	before and during the pandemic (between-subject)	injury study	injury patients	adults	defined sample			yes	yes	yes	yes	sufficient with concerns
Septhon 2021	The effect of COVID-19 on a Major Trauma Network. An analysis of mechanism of injury pattern, referral load and operative case-mix		Injury	2021-02-17	https://doi.org/10.1016/j.injury.2021.02.035	UK	UK							before and during	before and during the pandemic (between-subject)	injury study	injury patients	adults	defined sample			yes	yes	yes	yes	yes
Swiatek 2021	Evaluating the Early Impact of the COVID-19 Pandemic on Sports Surgery Fellowship Education		Curēus	2021-01-27	https://doi.org/10.7759/cureus.12943	USA	USA							before and during	before and during the pandemic (between-subject)	injury study	injury patients	adults	defined sample			yes	yes	yes	yes	yes
Nia 2021	Impact of lockdown during the COVID-19 pandemic on number of patients and patterns of injuries at a level I trauma center	Objective. The outbreak of severe acute respiratory syndrome coronavirus 2 (SARS-Cov-2) and its associated illness, coronavirus disease 2019 (COVID-19), has led to a global health crisis burdening frontline emergency departments, including orthopedic and trauma units. The aim of this study was to provide an overview of the impact of the lockdown secondary to the pandemic on patient numbers and pa…	Wiener klinische Wochenschrift	2021-03-03	https://doi.org/10.1007/s00508-021-01824-z	Austria	Austria							before and during	before and during the pandemic (between-subject)	injury study	injury patients	adults	defined sample			yes	yes	yes	yes	yes
Bin 2021	The trade-off behaviours between virtual and physical activities during the first wave of the COVID-19 pandemic period	The first wave of COVID-19 pandemic period has drastically changed people’s lives all over the world. To cope with the disruption, digital solutions have become more popular. However, the ability to adopt digitalised alternatives is different across socio-economic and socio-demographic groups. This study investigates how individuals have changed their activity-travel patterns and internet usage d…	European Transport Research Review	2021-02-10	https://doi.org/10.1186/s12544-021-00473-7	Sweden	multinational	781		2020-04-20	2020-05-18			only during	during the pandemic and recollect before (within-subject)	self-report	general population	adults	convenience sample			yes	no	sufficient with concerns	no	no
Elran-Barak 2020	One Month into the Reinforcement of Social Distancing due to the COVID-19 Outbreak: Subjective Health, Health Behaviors, and Loneliness among People with Chronic Medical Conditions.	We sought to examine how the near-lockdown measures, announced by the Israeli government in an effort to contain the COVID-19 outbreak, impacted the self-rated health (SRH), health behaviors, and loneliness of people with chronic illnesses. An online cross-sectional survey was carried out about one month (April 20-22, 2020) after the Israeli government reinforced the severe social distancing regu…	International Journal of Environmental Research and Public Health	2020-07-27	https://doi.org/10.3390/ijerph17155403	Israel	Israel	315		2020-04-20	2020-04-22	76.92	47	only during	during the pandemic and recollect before (within-subject)	self-report	patients	adults	convenience sample	Medical Outcomes Study	after	yes	yes	sufficient with concerns	sufficient with concerns	sufficient with concerns
Bazett-Jones 2020	Impact of COVID-19 Social Distancing Restrictions on Training Habits, Injury, and Care Seeking Behavior in Youth Long-Distance Runners.	Purpose: The COVID-19 pandemic impacted the sporting and exercise activities of millions of youth. Running is an activity that could be maintained while social distancing restrictions were implemented during the pandemic. If running-related injuries do occur, these restrictions may also influence the access to care or care seeking behavior of this population. Therefore, the purpose of this study …	Frontiers in Sports and Active Living	2020-11-11	https://doi.org/10.3389/fspor.2020.586141	USA	USA	287	15.3	2020-05-01	2020-06-30	66	57	only during	during the pandemic and recollect before (within-subject)	self-report	athletes/exercisers	children	convenience sample		after	yes	yes	sufficient with concerns	sufficient with concerns	no
Agarwal 2020	Characterizing Covid-19 Pandemic Related Anxiety and Its Impact on Cardioprotective Health Behaviors Among Racially and Ethnically Diverse Cardiac Arrest Survivors		Circulation	2020-11-09	https://doi.org/10.1161/circ.142.suppl_4.219	USA	USA	75	61	2020-05-15	2020-05-28	66.67	71	only during	during the pandemic and recollect before (within-subject)	self-report	patients	adults	convenience sample	International Physical Activity Questionnaire	after	yes	yes	sufficient with concerns	sufficient with concerns	sufficient with concerns
Athanasiadis 2020	How are bariatric patients coping during the coronavirus disease 2019 (COVID-19) pandemic? Analysis of factors known to cause weight regain among postoperative bariatric patients.	BACKGROUND: The global coronavirus disease 2019 (COVID-19) pandemic is wreaking havoc on society. Bariatric patients are more prone to severe infection due to their high body mass index (BMI) and are more vulnerable to the effects of isolation, such as depression or disruption of their health habits. OBJECTIVES: To quantify the impact of self-quarantine on bariatric patients and self-quarantine's…	Surgery for Obesity and Related Diseases: Official Journal of the American Society for Bariatric Surgery	2020-11-28	https://doi.org/10.1016/j.soard.2020.11.021	USA	USA	208	48.9					only during	during the pandemic: less or more	self-report	patients	adults	convenience sample			yes	yes	sufficient with concerns	yes	no
Gismero-Gonzalez 2020	Emotional Impact of COVID-19 Lockdown Among the Spanish Population	Background The COVID-19 pandemic has resulted in some populations being confined to their homes as part of infection control measures. This situation can be hard to cope with due to separation from loved ones, prohibition of regular activities, fear of infection, loss of freedom, and so on. These negative impacts cause considerable psychological stress, and all the more so when the situation cont…	Frontiers in Psychology	2020-12-17	https://doi.org/10.3389/fpsyg.2020.616978	Spain	Spain	906	43.43	2020-05-08	2020-05-13	67.58	60	only during	during the pandemic and recollect before (within-subject)	self-report	general population	adults	convenience sample	International Physical Activity Questionnaire	during	yes	sufficient with concerns	sufficient with concerns	yes	sufficient with concerns
Weaver 2021	Health Behaviors at the Onset of the COVID-19 Pandemic.	Objectives: We examined perceived behavior change since implementation of physical distancing restrictions and identified modifiable (self-rated health, resilience, depressive symptoms, social support and subjective wellbeing) and non-modifiable (demographics) risk/protective factors. Methods: A representative US sample (N = 362) completed an online survey about potential risk/protective factors …	American Journal of Health Behavior	2021-01-01	https://doi.org/10.5993/AJHB.45.1.4	USA	USA	362		2020-04-28	2020-05-06	66.67	54	only during	during the pandemic and recollect before (within-subject)	self-report	general population	adults	representative	International Physical Activity Questionnaire	after	yes	yes	sufficient with concerns	sufficient with concerns	no
Srivastav 2021	Impact of Coronavirus disease-19 (COVID-19) lockdown on physical activity and energy expenditure among physiotherapy professionals and students using web-based open E-survey sent through WhatsApp, Facebook and Instagram messengers	Background: Coronavirus disease 19 (COVID-19) spread throughout the world and become pandemic. To stop and control the rapid infection of COVID-19 lockdown is the best option. Sudden lockdown implies change in entire lifestyle of the population. Social isolation affects individual's lives by greater reduction in their physical activity, which might increase the chance of infection by reducing imm…	Clinical Epidemiology and Global Health	2020-07-14	https://doi.org/10.1016/j.cegh.2020.07.003	India	India	143	23.9	2020-03-01	2020-04-30	67.52	-4	only during	during the pandemic and recollect before (within-subject)	self-report	general population	adults	convenience sample	International Physical Activity Questionnaire	during	yes	no	sufficient with concerns	yes	no
Schlichtiger 2021	Physical activity during COVID-19 lockdown in older adults.		The Journal of Sports Medicine and Physical Fitness	2021-01-01	https://doi.org/10.23736/S0022-4707.20.11726-2	Germany	Germany	110	66	2020-03-24	2020-04-07	60.64	27	only during	during the pandemic and recollect before (within-subject)	self-report	general population	seniors	convenience sample	Physical Activity Questionnaire	before	yes	yes	sufficient with concerns	no	no
Yang 2020	Obesity and activity patterns before and during COVID-19 lockdown among youths in China.	This study aim to assess changes in obesity and activity patterns among youths in China during the COVID-19 lockdown. We used the COVID-19 Impact on lifestyle change survey (COINLICS), a national retrospective survey distributed via social media platforms in early May 2020 where more than 10 000 youth participants in China have voluntarily reported their basic sociodemographic information, weight…	Clinical Obesity	2020-10-02	https://doi.org/10.1111/cob.12416	China	China	10082	19.8	2020-05-01	2020-05-31	70.93	100	only during	during the pandemic and recollect before (within-subject)	self-report	general population	children	convenience sample	International Physical Activity Questionnaire	before	yes	yes	sufficient with concerns	sufficient with concerns	no
Aguilar-Farias 2021	Sociodemographic Predictors of Changes in Physical Activity, Screen Time, and Sleep among Toddlers and Preschoolers in Chile during the COVID-19 Pandemic	The aim was to examine the sociodemographic predictors associated with changes in movement behaviors (physical activity, screen time, and sleep) among toddlers and preschoolers during the early stages of the coronavirus disease 2019 pandemic in Chile. Caregivers of 1- to 5-year-old children completed an online survey between 30 March and 27 April 2020. Information about the child's movement behav…	International Journal of Environmental Research and Public Health	2020-12-29	https://doi.org/10.3390/ijerph18010176	Chile	Chile	3157	3.1	2020-03-30	2020-04-27	66.12	14	only during	during the pandemic and recollect before (within-subject)	self-report	general population	children	convenience sample		before	yes	yes	sufficient with concerns	yes	sufficient with concerns
Wunsch 2021	The Impact of COVID-19 on the Interrelation of Physical Activity, Screen Time and Health-Related Quality of Life in Children and Adolescents in Germany: Results of the Motorik-Modul Study.	Reduced physical activity (PA) and prolonged screen time (ST) negatively influence health-related quality of life (HRQoL), a protective factor against illness and mortality. Studies addressing the relationship between PA, ST, and mental health in youth are scarce, especially in times with high mental health burdens like the COVID-19 pandemic. The purpose of this examination was to investigate whe…	Children (Basel, Switzerland)	2021-02-02	https://doi.org/10.3390/children8020098	Germany	Germany	1711	10.36	2020-04-20	2020-04-30	63.78	54	before and during	before and during the pandemic (within-subject)	self-report	general population	children	representative	MoMo Physical Activity Questionnaire	during	yes	yes	sufficient with concerns	yes	sufficient with concerns
Wilson 2021	The Impact of the COVID-19 Pandemic on US College Students' Physical Activity and Mental Health.	BACKGROUND: Investigating the impact of the COVID-19 pandemic on both physical activity (PA) and mental health is important to demonstrate the need for interventions. This study examined the apparent impact of the pandemic on college students' PA, perceived stress, and depressive symptoms. METHODS: From 2015 through 2020, data were collected at the beginning and end of the spring semester at a la…	Journal of Physical Activity & Health	2021-02-18	https://doi.org/10.1123/jpah.2020-0325	USA	USA	1019	20.9	2020-01-31	2020-04-30	38.82	-34	before and during	before and during the pandemic (within-subject)	self-report	general population	adults	convenience sample	Global Physical Activity Questionnaire	during	yes	yes	sufficient with concerns	yes	sufficient with concerns
Lopez-Bueno 2020	Health-Related Behaviors Among School-Aged Children and Adolescents During the Spanish Covid-19 Confinement	In response to the coronavirus disease 2019 (Covid-19) world pandemic, affected countries such as Spain enacted measures comprising compulsory confinement as well as restrictions regarding free movement. Such measures likely influence children's and adolescents' lifestyles. Our study aimed to investigate the impact that the Covid-19 confinement has on health-related behaviors (HRBs) among Spanish…	Frontiers in Pediatrics	2020-09-11	https://doi.org/10.3389/fped.2020.00573	Spain	Spain	860	9.6	2020-03-22	2020-05-10	64.43	13	only during	during the pandemic and recollect before (within-subject)	self-report	general population	children	convenience sample		before	yes	yes	sufficient with concerns	yes	yes
Savage 2020	Mental health and movement behaviour during the COVID-19 pandemic in UK university students: Prospective cohort study	Statement of problem: The COVID-19 pandemic is expected to negatively impact the mental health of university students, yet there is lack of prospective longitudinal data quantifying such changes. The purpose of this study was to examine the mental health and movement behaviours, and the associations between the changes in mental health and movement behaviours, of UK university students during the…	Mental Health and Physical Activity	2020-09-24	https://doi.org/10.1016/j.mhpa.2020.100357	UK	UK	214	20	2020-01-28	2020-04-27	33.65	-50	before and during	before and during the pandemic (within-subject)	self-report	general population	adults	convenience sample	Exercise Vital Sign Questionnaire	before	yes	sufficient with concerns	sufficient with concerns	sufficient with concerns	sufficient with concerns
Romero-Blanco 2020	Physical Activity and Sedentary Lifestyle in University Students: Changes during Confinement Due to the COVID-19 Pandemic.	Regular physical activity is related to many factors in a university student's environment. The coronavirus pandemic and the resulting lockdown have restricted many elements of our environment. The aim of this study was to evaluate students' physical activity and sedentary behaviour at two points in time: before and during the coronavirus lockdown. As a secondary aim, we also wanted to look at ch…	International Journal of Environmental Research and Public Health	2020-09-09	https://doi.org/10.3390/ijerph17186567	Spain	Spain	213	20.5	2020-04-01	2020-04-15	66.41	23	before and during	before and during the pandemic (within-subject)	self-report	general population	adults	convenience sample	International Physical Activity Questionnaire	before	yes	yes	sufficient with concerns	sufficient with concerns	sufficient with concerns
Coughenour 2020	Changes in Depression and Physical Activity Among College Students on a Diverse Campus After a COVID-19 Stay-at-Home Order	The numerous negative health impacts of COVID-19, which include expected changes to psychiatric illness and physical activity (PA), are disproportionately distributed in the United States. Mental illnesses and physical inactivity are prevalent among U.S. college students. This study examined whether there was a change in minutes of PA and depression scores after a stay-at-home order and examined …	Journal of Community Health	2020-11-09	https://doi.org/10.1007/s10900-020-00918-5	USA	USA	194	25.11	2020-05-07	2020-05-28	66.67	63	only during	during the pandemic and recollect before (within-subject)	self-report	general population	adults	convenience sample	Estimate Cardiorespiratory Fitness	after	yes	yes	sufficient with concerns	yes	yes
Mon-López 2020	The Impact of Covid-19 and the Effect of Psychological Factors on Training Conditions of Handball Players.	The spread of COVID-19 has altered sport in Spain, forcing athletes to train at home. The objectives of the study were: (i) to compare training and recovery conditions before and during the isolation period in handball players according to gender and competitive level, and (ii) to analyse the impact of psychological factors during the isolation period. A total of 187 participants (66 women and 12…	International Journal of Environmental Research and Public Health	2020-11-05	https://doi.org/10.3390/ijerph17186471	Spain	Spain	187	23.27	2020-04-16	2020-04-26	65.38	38	only during	during the pandemic and recollect before (within-subject)	self-report	athletes/exercisers	adults	convenience sample		before	yes	yes	sufficient with concerns	yes	no
Bertrand 2021	The impact of the coronavirus disease 2019 (COVID-19) pandemic on university students' dietary intake, physical activity, and sedentary behaviour.	University students are a vulnerable group for poor dietary intake, insufficient physical activity and sedentary behaviour. The purpose of this study was to examine the impact of coronavirus disease (COVID-19) on university students' dietary intake, physical activity, and sedentary behaviour. Participants were students (n = 125) from the Universities of Saskatchewan and Regina. An online question…	Applied Physiology, Nutrition, and Metabolism	2021-01-15	https://doi.org/10.1139/apnm-2020-0990	Canada	Canada	125		2020-04-01	2020-07-31	59.51	20	only during	during the pandemic and recollect before (within-subject)	self-report	general population	adults	convenience sample	Godin-Shephard Leisure-Time Physical Activity Questionnaire	before	yes	no	sufficient with concerns	sufficient with concerns	no
Cheval 2020	Relationships between changes in self-reported physical activity, sedentary behaviour and health during the coronavirus (COVID-19) pandemic in France and Switzerland	To assess whether changes in physical activity and sedentary behaviour during the COVID-19 lockdown are associated with changes in mental and physical health. Observational longitudinal study. Participants living in France or Switzerland responded to online questionnaires measuring physical activity, physical and mental health, anxiety, and depressive symptoms. Paired sample t-tests were used to …	Journal of Sports Science	2020-10-29	https://doi.org/10.1080/02640414.2020.1841396	Switzerland	Multinational	110	43	2020-03-30	2020-04-21			only during	during the pandemic and recollect before (within-subject)	self-report	general population	adults	convenience sample	International Physical Activity Questionnaire		yes	sufficient with concerns	sufficient with concerns	sufficient with concerns	sufficient with concerns
Lawrence 2021	The mental and behavioral health impact of COVID-19 stay at home orders on social work students	The COVID-19 pandemic and its resulting stay at home orders have had significant effects on mental and behavioral health. College and University students are at particular risk of mental and behavioral health issues due to the social distancing, stay at home orders and the abrupt shift from face-to-face to online learning. This study aimed to determine the impact that stay at home orders have on …	Social Work Education	2021-02-03	https://doi.org/10.1080/02615479.2021.1883582	USA	USA	88	28.97	2020-05-26	2020-07-03	65.57	82	only during	during the pandemic and recollect before (within-subject)	self-report	general population	adults	convenience sample	Godin-Shephard Leisure-Time Physical Activity Questionnaire	after	yes	yes	sufficient with concerns	yes	yes
Malta 2020	The COVID-19 Pandemic and changes in adult Brazilian lifestyles: a cross-sectional study, 2020.	OBJECTIVE: To describe lifestyle changes with regard to consumption of tobacco and alcohol, food intake and physical activity, in the period of social restriction resulting from the COVID-19 pandemic. METHODS: This is a cross-sectional study conducted in Brazil with data from the ConVid online health behavior survey. The data were collected via an online questionnaire answered by the survey parti…	Epidemiologia e Serviços de Saúde	2020-09-25	https://doi.org/10.1590/S1679-49742020000400026	Brazil	Brazil	45161		2020-04-24	2020-05-24	72.04	43	only during	during the pandemic and recollect before (within-subject)	self-report	general population	adults	convenience sample		before	yes	yes	sufficient with concerns	yes	yes
Werneck 2021	Physical inactivity and elevated TV-viewing reported changes during the COVID-19 pandemic are associated with mental health: A survey with 43,995 Brazilian adults.	OBJECTIVE: To analyze the associations of physical activity and TV-viewing reported changes during the COVID-19 pandemic quarantine with mental health among Brazilian adults with and without depression. METHODS: Data of 43,995 Brazilian adults from a cross-sectional, nationwide behavior research were used. Participants reported the frequency on loneliness, sadness (feel sad, crestfallen or depres…	Journal of Psychosomatic Research	2020-11-10	https://doi.org/10.1016/j.jpsychores.2020.110292	Brazil	Brazil	43995	43	2020-04-24	2020-05-24	72.04	43	only during	during the pandemic and recollect before (within-subject)	self-report	general population	adults	convenience sample		before	yes	yes	sufficient with concerns	yes	sufficient with concerns
Drieskens 2021	Short-term impact of the COVID-19 confinement measures on health behaviours and weight gain among adults in Belgium.	BACKGROUND: In Belgium, confinement measures were introduced on the 13th of March 2020 to curb the spread of the coronavirus disease (COVID-19). These measures may affect health behaviours of the population such as eating habits, physical activity and alcohol consumption, which in turn can lead to weight gain resulting in overweight and obesity, increasing the risk of several chronic diseases, bu…	Archives of Public Health	2021-02-22	https://doi.org/10.1186/s13690-021-00542-2	Belgium	Belgium	28029		2020-04-16	2020-04-23	62.82	37	only during	during the pandemic: less or more	self-report	general population	adults	convenience sample		before	yes	yes	sufficient with concerns	yes	yes
Tran 2020	Impacts and interactions of COVID-19 response involvement, health-related behaviours, health literacy on anxiety, depression and health-related quality of life among healthcare workers: a cross-sectional study.	OBJECTIVES: We examined impacts and interactions of COVID-19 response involvement, health-related behaviours and health literacy (HL) on anxiety, depression, and health-related quality of life (HRQoL) among healthcare workers (HCWs). DESIGN: A cross-sectional study was conducted. Data were collected 6 April to 19 April 2020 using online-based, self-administered questionnaires. SETTING: 19 hospita…	BMJ Open	2020-12-07	https://doi.org/10.1136/bmjopen-2020-041394	Vietnam	Vietnam	7124	34.4	2020-04-06	2020-04-19	83.4	67	only during	during the pandemic: less or more	self-report	general population	adults	convenience sample		during	yes	yes	sufficient with concerns	sufficient with concerns	sufficient with concerns
Chambonniere 2021	Effect of the COVID-19 lockdown on physical activity and sedentary behaviors in French children and adolescents: New results from the ONAPS national survey.	Introduction: In France March14, 2020a national lockdown was imposed in France for 55 days to prevent the spread of COVID-19 and all schools were closed. This study aimed to investigate the effects of home confinement as a result of lockdown on the activity (physical activity and sedentary behaviors), and their determinants, on French children (6-10 years) and adolescents (11-17 years). Methods: …	European Journal of Integrative Medicine	2021-02-09	https://doi.org/10.1016/j.eujim.2021.101308	France	France	6491		2020-04-01	2020-05-06	68.54	32	only during	during the pandemic and recollect before (within-subject)	self-report	general population	children	convenience sample		before	yes	sufficient with concerns	sufficient with concerns	sufficient with concerns	sufficient with concerns
Busse 2021	Engagement in Health Risk Behaviours before and during the COVID-19 Pandemic in German University Students: Results of a Cross-Sectional Study.	Tobacco and cannabis use, alcohol consumption and inactivity are health risk behaviors (HRB) of crucial importance for health and wellbeing. The impact of the COVID-19 pandemic on university students' engagement in HRB has yet received limited attention. We investigated whether HRB changed during the COVID-19 pandemic, assessed factors associated with change and profiles of HRB changes in univers…	International Journal of Environmental Research and Public Health	2021-02-03	https://doi.org/10.3390/ijerph18041410	Germany	Germany	5021	24.4	2020-05-12	2020-05-29	57.66	76	only during	during the pandemic and recollect before (within-subject)	self-report	general population	adults	convenience sample		after	yes	sufficient with concerns	sufficient with concerns	sufficient with concerns	no
Duncan 2020	Perceived change in physical activity levels and mental health during COVID-19: Findings among adult twin pairs.	BACKGROUND: Physical distancing and other COVID-19 pandemic mitigation strategies may have unintended consequences on a number of health behaviors and health outcomes. The purpose of this study was to investigate the association between perceived change in physical activity or exercise and mental health outcomes over the short-term in response to COVID-19 mitigation strategies in a sample of adul…	PloS one	2020-08-13	https://doi.org/10.1371/journal.pone.0237695	USA	USA	3971	50.4	2020-03-26	2020-04-05	63.17	21	only during	during the pandemic: less or more	self-report	general population	adults	convenience sample		before	yes	yes	sufficient with concerns	yes	yes
Meyer 2020	Changes in Physical Activity and Sedentary Behavior in Response to COVID-19 and Their Associations with Mental Health in 3052 US Adults.	The COVID-19 pandemic altered many facets of life. We aimed to evaluate the impact of COVID-19-related public health guidelines on physical activity (PA), sedentary behavior, mental health, and their interrelations. Cross-sectional data were collected from 3052 US adults 3-8 April 2020 (from all 50 states). Participants self-reported pre- and post-COVID-19 levels of moderate and vigorous PA, sitt…	International Journal of Environmental Research and Public Health	2020-09-05	https://doi.org/10.3390/ijerph17186469	USA	USA	3052		2020-04-03	2020-04-07	65.13	29	only during	during the pandemic and recollect before (within-subject)	self-report	general population	adults	convenience sample		during	yes	yes	sufficient with concerns	yes	yes
Galali 2021	The impact of COVID-19 confinement on the eating habits and lifestyle changes: A cross sectional study		Food Science & Nutrition	2021-01-16	https://doi.org/10.1002/fsn3.2179	Iraq	Iraq	2137		2020-06-01	2020-06-14	80.77	110	only during	during the pandemic and recollect before (within-subject)	self-report	general population	adults	convenience sample		after	yes	sufficient with concerns	sufficient with concerns	sufficient with concerns	sufficient with concerns
Robinson 2021	Obesity, eating behavior and physical activity during COVID-19 lockdown: A study of UK adults.	Eating, physical activity and other weight-related lifestyle behaviors may have been impacted by the COVID-19 crisis and people with obesity may be disproportionately affected. We examined weight-related behaviors and weight management barriers among UK adults during the COVID-19 social lockdown. During April-May of the 2020 COVID-19 social lockdown, UK adults (N = 2002) completed an online surve…	Appetite	2020-10-07	https://doi.org/10.1016/j.appet.2020.104853	UK	UK	2002	34.74	2020-04-22	2020-05-22	56.93	35	only during	during the pandemic: less or more	self-report	patients	adults	convenience sample	International Physical Activity Questionnaire	before	yes	yes	sufficient with concerns	yes	no
Huber 2020	Type of sport activities during COVID-19 crisis among Bavarian students		Journal of Sports Medicine and Physical Fitness	2020-06-30	https://doi.org/10.23736/S0022-4707.20.11350-1	Germany	Germany	1980	23.3					only during	during the pandemic and recollect before (within-subject)	self-report	general population	adults	convenience sample			yes	yes	sufficient with concerns	sufficient with concerns	sufficient with concerns
Botero 2021	Impact of the COVID-19 pandemic stay at home order and social isolation on physical activity levels and sedentary behavior in Brazilian adults	Objective: To investigate the impact of the coronavirus 2019 pandemic on physical activity levels and sedentary behavior among Brazilians residents aged ≥18 years. Methods: An online survey was distributed through a social media platform between May 5 and 17, 2020. Participants completed a structured questionnaire in Google Forms, which assessed the physical activity level and sedentary behavior …	Einstein (São Paulo)	2021-02-26	https://doi.org/10.31744/einstein_journal/2021AE6156	Brazil	Brazil	1881	39	2020-05-05	2020-05-17	73.08	54	only during	during the pandemic: less or more	self-report	general population	adults	convenience sample		before	yes	yes	sufficient with concerns	sufficient with concerns	no
Diniz 2020	Reduction of Physical Activity Levels During the COVID-19 Pandemic Might Negatively Disturb Sleep Pattern	Background The outbreak of novel coronavirus disease 2019 (COVID-19) has caused a global panic and public concern due to its mortality ratio and lack of treatments/vaccines. Reduced levels of physical activity have been reported during the outbreak, affecting the normal daily pattern. Objective To investigate (i) the relationship of physical activity level with sleep quality and (ii) the effects …	Frontiers in Psychology	2020-12-10	https://doi.org/10.3389/fpsyg.2020.586157	Brazil	Brazil	1874	38.3	2020-05-05	2020-05-17	73.08	54	only during	during the pandemic: less or more	self-report	general population	adults	convenience sample		before	yes	sufficient with concerns	sufficient with concerns	yes	sufficient with concerns
Gildner 2020	Exercise routine change is associated with prenatal depression scores during the COVID-19 pandemic among pregnant women across the United States.	BACKGROUND: The COVID-19 pandemic has negatively affected physical and mental health worldwide. Pregnant women already exhibit an elevated risk for depression compared to the general public, a pattern expected to be exacerbated by the pandemic. Certain lifestyle factors, including moderate exercise, may help support mental health during pregnancy, but it is unclear how the pandemic may impact the…	PloS one	2020-12-21	https://doi.org/10.1371/journal.pone.0243188	USA	USA	1856	31.3	2020-04-16	2020-06-16	66.59	42	only during	during the pandemic: less or more	self-report	general population	adults	convenience sample		after	yes	yes	sufficient with concerns	yes	sufficient with concerns
Stanton 2020	Depression, Anxiety and Stress during COVID-19: Associations with Changes in Physical Activity, Sleep, Tobacco and Alcohol Use in Australian Adults.	The novel coronavirus (COVID-19) has enforced dramatic changes to daily living including economic and health impacts. Evidence for the impact of these changes on our physical and mental health and health behaviors is limited. We examined the associations between psychological distress and changes in selected health behaviors since the onset of COVID-19 in Australia. An online survey was distribut…	International Journal of Environmental Research and Public Health	2020-06-07	https://doi.org/10.3390/ijerph17114065	Australia	Australia	1491	50.5	2020-04-09	2020-04-19	60.43	68	only during	during the pandemic and recollect before (within-subject)	self-report	general population	adults	convenience sample	Active Australia Survey	before	yes	yes	sufficient with concerns	yes	no
Anyan 2020	Change in Physical Activity During the Coronavirus Disease 2019 Lockdown in Norway: The Buffering Effect of Resilience on Mental Health	Imposition of lockdown restrictions during the coronavirus disease 2019 (COVID-19) pandemic was sudden and unprecedented and dramatically changed the life of many people, as they were confined to their homes with reduced movement and access to fitness training facilities. Studies have reported significant associations between physical inactivity, sedentary behavior, and common mental health probl…	Frontiers in Psychology	2020-12-15	https://doi.org/10.3389/fpsyg.2020.598481	Norway	Norway	1314	49	2020-03-12	2020-06-15	51.11	0	only during	during the pandemic: less or more	self-report	athletes/exercisers	adults	convenience sample		during	yes	sufficient with concerns	sufficient with concerns	yes	yes
Ernstsen 2021	Mental health and sleep disturbances in physically active adults during the COVID-19 lockdown in Norway: does change in physical activity level matter?	STUDY OBJECTIVE: To assess mental health and sleep disturbances among physically active adults during the Norwegian lockdown caused by the coronavirus disease 2019 (COVID-19), and to investigate if change in physical activity (PA) level during the lockdown moderates the association between mental health and sleep disturbances. METHODS: Members of a Norwegian fitness association were invited to fi…	Sleep Medicine	2020-09-05	https://doi.org/10.1016/j.sleep.2020.08.030	Norway	Norway	1281	48.9	2020-06-03	2020-06-15	42.8	83	only during	during the pandemic: less or more	self-report	athletes/exercisers	adults	convenience sample		after	yes	yes	sufficient with concerns	yes	sufficient with concerns
Lesser 2020	The Impact of COVID-19 on Physical Activity Behavior and Well-Being of Canadians.	A global pandemic caused by the novel coronavirus (COVID-19) resulted in restrictions to daily living for Canadians, including social distancing and closure of city and provincial recreation facilities, national parks and playgrounds. The objective of this study was to assess how these preemptive measures impacted physical activity behaviour and well-being of Canadians. An online survey was utili…	International Journal of Environmental Research and Public Health	2020-05-31	https://doi.org/10.3390/ijerph17113899	Canada	Canada	1098	42	2020-04-01	2020-05-01	59.79	20	only during	during the pandemic and recollect before (within-subject)	self-report	general population	adults	convenience sample	Godin-Shephard Leisure-Time Physical Activity Questionnaire	before	yes	yes	sufficient with concerns	sufficient with concerns	sufficient with concerns
Sánchez-Sánchez 2020	Eating Habits and Physical Activity of the Spanish Population during the COVID-19 Pandemic Period.	Due to the pandemic situation caused by the COVID-19 infection, some governments have implemented house confinement measures. The objective of our study is to learn the dietary patterns, consumption, and physical activity of the Spanish population before and during the period of confinement by COVID-19. A cross-sectional descriptive study based on a questionnaire during May 2020, coinciding with …	Nutrients	2020-09-15	https://doi.org/10.3390/nu12092826	Spain	Spain	1073	38.7	2020-05-01	2020-05-31	66.54	53	only during	during the pandemic and recollect before (within-subject)	self-report	general population	adults	convenience sample		during	yes	yes	sufficient with concerns	sufficient with concerns	yes
Rhodes 2020	Correlates of Perceived Physical Activity Transitions during the COVID-19 Pandemic among Canadian Adults.	BACKGROUND: The purpose of this study was to explore socio-ecological predictors of moderate to vigorous physical activity (MVPA) as a result of the COVD-19 pandemic restrictions. METHOD: A representative sample of 1,055 English-speaking Canadians (18+ years) completed measures of MVPA during the COVID-19 restrictions and reflecting on MVPA prior to these restrictions, as well as demographics, CO…	Applied Psychology: Health and Well-Being	2020-10-01	https://doi.org/10.1111/aphw.12236	Canada	Canada	1055	48.82	2020-05-01	2020-05-07	60.26	50	only during	during the pandemic and recollect before (within-subject)	self-report	general population	adults	representative	Godin-Shephard Leisure-Time Physical Activity Questionnaire	before	yes	yes	sufficient with concerns	yes	sufficient with concerns
Tanaka 2021	Lifestyle changes by COVID-19 containment measure: body weight and glycemic control in patients with diabetes in the Japanese declaration of a state of emergency.	To clarify the association between lifestyle changes by COVID-19 containment measure and changes in metabolic and glycemic status in patients with diabetes (DM), a cross-sectional, single-center, observation study was conducted. A self-reported questionnaire was provided to ascertain the frequency of various lifestyle activities before and after the Covid-19 measure in Japan. Among 463 patients, …	Journal of Diabetes Investigation	2021-02-18	https://doi.org/10.1111/jdi.13526	Japan	Japan	463	65	2020-06-08	2020-06-18	29.14	109	only during	during the pandemic: less or more	objective measures	patients	adults	convenience sample			yes	sufficient with concerns	sufficient with concerns	sufficient with concerns	no
Mutz 2020	Forced adaptations of sporting behaviours during the Covid-19 pandemic and their effects on subjective well-being	Few studies have shown that exercise withdrawal and forced inactivity lead to negative mood states and increased symptoms of depression. Involuntary inactivity has become reality for millions during the Covid-19 pandemic, as mitigation and containment policies included the closings of sports facilities and leisure infrastructures. Based on representative survey data from Germany (>= 14 years,N = …	European Societies	2020-11-22	https://doi.org/10.1080/14616696.2020.1821077	Germany	Germany	1001		2020-03-27	2020-04-06	60.75	30	only during	during the pandemic and recollect before (within-subject)	self-report	general population	adults	representative	Leisure Time Sport and Exercise	before	yes	no	sufficient with concerns	sufficient with concerns	sufficient with concerns
Chopra 2020	Impact of COVID-19 on lifestyle-related behaviours- a cross-sectional audit of responses from nine hundred and ninety-five participants from India.	BACKGROUND AND AIMS: The impact of measures taken to contain COVID-19 on lifestyle-related behaviour is undefined in Indian population. The current study was undertaken to assess the impact of COVID-19 on lifestyle-related behaviours: eating, physical activity and sleep behaviour. METHODS: The study is a cross-sectional web-based survey. A validated questionnaire to assess the changes in lifestyl…	Diabetes & Metabolic Syndrome	2020-10-06	https://doi.org/10.1016/j.dsx.2020.09.034	India	India	995	33.33	2020-08-15	2020-08-30	74.8	163	only during	during the pandemic and recollect before (within-subject)	self-report	general population	adults	convenience sample		after	yes	yes	sufficient with concerns	sufficient with concerns	yes
Whitaker 2021	Variations in health behaviors among pregnant women during the COVID-19 pandemic.	PURPOSE: To examine changes in lifestyle behaviors early in the COVID-19 pandemic among pregnant women. MATERIALS AND METHODS: A cross-sectional internet-based survey was completed by 706 pregnant women (mean age 29.6 years ± 3.2) residing in the United States in May 2020 to assess self-reported changes in diet, physical activity, and sleep during the COVID-19 pandemic. Logistic regression analys…	Midwifery	2021-01-22	https://doi.org/10.1016/j.midw.2021.102929	USA	USA	706	29.6	2020-05-06	2020-05-08	66.67	62	only during	during the pandemic: less or more	self-report	general population	adults	convenience sample	Behavioral Risk Factor Surveillance System	after	yes	yes	sufficient with concerns	yes	yes
Zaworski 2020	Physical Activity of Poles in the Care for Their Health Potential Before and During the COVID-19 Pandemic.	OBJECTIVES: The aim of this study is to present the engagement of adult Poles in physical activity (PA) before and during the coronavirus pandemic, taking into consideration: frequency, duration, and types of the activity, depending on the gender and age of the participants. METHODS: The study was conducted using an online survey questionnaire. A total of 688 residents of Poland aged 18 to 58 (28…	Disaster Medicine and Public Health Preparedness	2020-10-22	https://doi.org/10.1017/dmp.2020.398	Poland	Poland	688	28.61	2020-04-14	2020-04-30	69.19	33	only during	during the pandemic and recollect before (within-subject)	self-report	general population	adults	convenience sample		during	yes	yes	sufficient with concerns	sufficient with concerns	sufficient with concerns
Qi 2020	Physical Activity, Health-Related Quality of Life, and Stress among the Chinese Adult Population during the COVID-19 Pandemic.	The COVID-19 pandemic poses a threat to global public health due to home confinement policies impacting on physical activity engagement and overall health. This study aimed to explore physical activity participation, health-related quality of life (HRQoL), and levels of perceived stress among Chinese adults during the COVID-19 pandemic. An online survey was conducted between 25 February and 15 Ma…	International Journal of Environmental Research and Public Health	2020-09-07	https://doi.org/10.3390/ijerph17186494	Australia	China	645	31.8	2020-02-25	2020-03-15	73.72	34	only during	during the pandemic and recollect before (within-subject)	self-report	general population	adults	convenience sample	International Physical Activity Questionnaire	before	yes	yes	sufficient with concerns	yes	yes
Hommes 2021	SARS-CoV-2 Infection, Risk Perception, Behaviour and Preventive Measures at Schools in Berlin, Germany, during the Early Post-Lockdown Phase: A Cross-Sectional Study		International Journal of Environmental Research and Public Health	2021-03-08	https://doi.org/10.3390/ijerph18052739	Germany	Germany	535		2020-06-11	2020-06-19	59.44	106	only during	during the pandemic: less or more	self-report	general population	children	convenience sample		after	yes	yes	sufficient with concerns	sufficient with concerns	sufficient with concerns
Dragun 2021	Have Lifestyle Habits and Psychological Well-Being Changed among Adolescents and Medical Students Due to COVID-19 Lockdown in Croatia?	Objective: To investigate dietary habits, sleep and psychological well-being of adolescents and medical students during COVID-19 lockdown in Split, Croatia. Methods: We surveyed 1326 students during 2018 and 2019, and compared their responses with 531 students enrolled in May 2020. Perceived stress, quality of life (QoL), happiness, anxiety, and optimism were assessed as proxies of psychological …	Nutrients	2020-12-20	https://doi.org/10.3390/nu13010097	Croatia	Croatia	531	18	2020-05-01	2020-05-31	65.53	52	before and during	before and during the pandemic (between-subject)	self-report	general population	adults	convenience sample		after	yes	yes	sufficient with concerns	yes	sufficient with concerns
Arai 2021	Behavioral changes and hygiene practices of older adults in Japan during the first wave of COVID-19 emergency.	BACKGROUND: On April 7, 2020, Japan declared a state of emergency due to the first wave of coronavirus disease 2019 (COVID-19) with the associated social distancing likely to have had a great impact on older adults' lifestyle and health. This study aimed to explore the behavioral changes and personal hygiene practices in relation with background psychosocial and health characteristics of older ad…	BMC Geriatrics	2021-02-24	https://doi.org/10.1186/s12877-021-02085-1	Japan	Japan	487	89.3	2020-05-25	2020-08-31	31	95	before and during	before and during the pandemic (within-subject)	self-report	general population	seniors	convenience sample	Zutphen Physical Activity Questionnaire	after	yes	yes	sufficient with concerns	yes	sufficient with concerns
Rodríguez-NogueiraÓ 2020	Musculoskeletal Pain and Teleworking in Times of the COVID-19: Analysis of the Impact on the Workers at Two Spanish Universities.	The special situation brought about by the coronavirus pandemic and the confinement imposed by the Government, has given rise to numerous changes in working habits. The workers at the universities have had to start a period of teleworking that could give rise to consequences for the musculoskeletal system. The objective of this article is to analyze the impact of the confinement on the musculoske…	International Journal of Environmental Research and Public Health	2020-12-23	https://doi.org/10.3390/ijerph18010031	Spain	Spain	472	46.42	2020-04-01	2020-05-31	66.22	23	only during	during the pandemic: less or more	self-report	general population	adults	convenience sample		during	yes	yes	sufficient with concerns	yes	sufficient with concerns
Husain 2020	Does COVID-19 change dietary habits and lifestyle behaviours in Kuwait: a community-based cross-sectional study.	BACKGROUND: The coronavirus pandemic has transformed and continues to transform and affect the daily lives of communities worldwide, particularly due to the lockdown restrictions. Therefore, this study was designed to understand the changes in dietary and lifestyle behaviours that are major determinants of health during the COVID-19 outbreak. METHODS: A cross-sectional study was conducted through…	Environmental Health and Preventive Medicine	2020-10-12	https://doi.org/10.1186/s12199-020-00901-5	Kuwait	Kuwait	415	38.47	2020-03-30	2020-04-15	74.13	29	only during	during the pandemic and recollect before (within-subject)	self-report	general population	adults	convenience sample		before	yes	yes	sufficient with concerns	sufficient with concerns	yes
Assaloni 2020	Coronavirus disease (Covid-19): How does the exercise practice in active people with type 1 diabetes change? A preliminary survey.	AIMS: Coronavirus disease (Covid-19) could lead persons with pre-existing medical conditions to severe respiratory infections. The Italian Government introduced quarantine to limit viral transmission. This measure could lead people with type 1 diabetes (PWT1D) to disrupt daily care routine including PA practice with difficulties in glycemia management. This study aims to explore PA level in PWT1D…	Diabetes Research and Clinical Practice	2020-07-02	https://doi.org/10.1016/j.diabres.2020.108297	Italy	Italy	154	44.8	2020-03-17	2020-03-21	73.59	46	before and during	before and during the pandemic (within-subject)	objective measures	patients	adults	convenience sample	Godin-Shephard Leisure-Time Physical Activity Questionnaire		yes	yes	sufficient with concerns	sufficient with concerns	sufficient with concerns
McCormack 2020	Parent anxiety and perceptions of their child's physical activity and sedentary behaviour during the COVID-19 pandemic in Canada.	The public health emergency response to the COVID-19 virus has involved physical distancing strategies to reduce person-to-person transmission. Pandemics, including COVID-19, may influence changes to physical activity and sedentary behaviours among children. However, the role of parent anxiety related to COVID-19 on children's physical activity and sedentary behaviours has yet to be explored. The…	Preventive Medicine Reports	2020-12-02	https://doi.org/10.1016/j.pmedr.2020.101275	Canada	Canada	328	10.8	2020-04-14	2020-05-27	59.81	33	only during	during the pandemic: less or more	self-report	general population	children	convenience sample		before	yes	yes	sufficient with concerns	yes	sufficient with concerns
Dunton 2020	Early effects of the COVID-19 pandemic on physical activity and sedentary behavior in children living in the U.S.	BACKGROUND: COVID-19 restrictions such as the closure of schools and parks, and the cancellation of youth sports and activity classes around the United States may prevent children from achieving recommended levels of physical activity (PA). This study examined the effects of the COVID-19 pandemic on PA and sedentary behavior (SB) in U.S. children. METHOD: Parents and legal guardians of U.S. child…	BMC Public Health	2020-09-04	https://doi.org/10.1186/s12889-020-09429-3	USA	USA	211	8.73	2020-04-25	2020-05-16	66.67	51	only during	during the pandemic: less or more	self-report	general population	children	convenience sample		after	yes	yes	sufficient with concerns	sufficient with concerns	sufficient with concerns
Meiring 2021	The Effect of the COVID-19 Pandemic Movement Restrictions on Self-Reported Physical Activity and Health in New Zealand: A Cross-Sectional Survey.	This study describes self-reported physical activity (PA), motivation to exercise, physical and mental health and feelings towards PA during the March-May 2020 COVID-19 lockdown in New Zealand. Adults over the age of 18 years (n = 238; 80.2% female) completed the International Physical Activity Questionnaire (IPAQ), the Behavioural Regulation in Exercise Questionnaire 3, the Short Form-36 and ope…	International Journal of Environmental Research and Public Health	2021-02-10	https://doi.org/10.3390/ijerph18041719	New Zealand	Multinational	196		2020-04-01	2020-06-30			only during	during the pandemic and recollect before (within-subject)	self-report	general population	adults	convenience sample	International Physical Activity Questionnaire		yes	sufficient with concerns	sufficient with concerns	sufficient with concerns	sufficient with concerns
Yamada 2020	Changes in Older People's Activities During the Coronavirus Disease 2019 Pandemic in Japan.		Journal of the American Medical Directors Association	2020-08-03	https://doi.org/10.1016/j.jamda.2020.07.039	Japan	Japan	114		2020-02-24	2020-05-25	37.84	4	before and during	before and during the pandemic (within-subject)	objective measures	general population	seniors	convenience sample			sufficient with concerns	no	sufficient with concerns	yes	yes
Branley-Bell 2020	Exploring the impact of the COVID-19 pandemic and UK lockdown on individuals with experience of eating disorders	Background The coronavirus disease 2019 (COVID-19) pandemic may raise unique challenges for individuals with experience of eating disorders. Many factors have potential for detrimental impacts on psychological wellbeing and eating disorder recovery, including: Disruption to living situations, 'social distancing' restrictions, difficult access to healthcare, and societal changes to food behaviours…	Journal of Eating Disorders	2020-08-24	https://doi.org/10.1186/s40337-020-00319-y	UK	UK	129	29.27					only during	during the pandemic: less or more	self-report	patients	adults	convenience sample			yes	yes	sufficient with concerns	sufficient with concerns	no
DiSanto 2020	The Effects of COVID-19 and Quarantine Measures on the Lifestyles and Mental Health of People Over 60 at Increased Risk of Dementia	Background: The lockdown strategies adopted to limit the spread of COVID-19 infection may lead to adopt unhealthy lifestyles which may impact on the mental well-being and future risk of dementia. Older adults with mild cognitive impairment (MCI) or subjective cognitive decline (SCD) may suffer important mental health consequences from measures of quarantine and confinement. Aims: The study aimed …	Frontiers in Psychiatry	2020-10-14	https://doi.org/10.3389/fpsyt.2020.578628	Italy	Italy	126	74.29	2020-04-21	2020-05-07	79.31	81	only during	during the pandemic and recollect before (within-subject)	self-report	patients	seniors	convenience sample	International Physical Activity Questionnaire	after	yes	yes	sufficient with concerns	yes	yes
Theis 2021	The effects of COVID-19 restrictions on physical activity and mental health of children and young adults with physical and/or intellectual disabilities.	BACKGROUND: COVID-19 has caused unprecedented restrictions, significantly affecting the most vulnerable groups in society, such as those with a disability. OBJECTIVE: The aim of the study was to investigate the effects of COVID-19 lockdown restrictions on physical activity and mental health of children and young adults with physical and/or intellectual disabilities. METHODS: The study was a cross…	Disability and Health Journal	2021-01-22	https://doi.org/10.1016/j.dhjo.2021.101064	UK	UK	125	12.3	2020-06-17	2020-07-17	62.83	91	only during	during the pandemic and recollect before (within-subject)	self-report	patients	children	convenience sample	International Physical Activity Questionnaire	during	yes	yes	sufficient with concerns	yes	no
Sankar 2020	Effects of COVID-19 lockdown on type 2 diabetes, lifestyle and psychosocial health: A hospital-based cross-sectional survey from South India.	BACKGROUND AND AIMS: Lockdown during the COVID-19 pandemic imposed many restrictions on the public. Loss of continuum of care along with improper lifestyle was expected to worsen glycemic control in people with type 2 diabetes (T2D). We aimed to identify the effects of lockdown on their glycemic status, lifestyle changes and psychosocial health. METHODS: The pre- and post-lockdown data of 110 adu…	Diabetes & Metabolic Syndrome	2020-09-11	https://doi.org/10.1016/j.dsx.2020.09.005	India	India	110	58.67	2020-05-18	2020-06-15	75.83	74	only during	during the pandemic: less or more	self-report	patients	adults	convenience sample		after	yes	sufficient with concerns	sufficient with concerns	sufficient with concerns	no
Jagim 2020	The Impact of COVID-19-Related Shutdown Measures on the Training Habits and Perceptions of Athletes in the United States: A Brief Research Report.	The purpose of the current study was to examine the impact of COVID-19 government-enforced shutdown measures on the training habits and perceptions of athletes. A web-based electronic survey was developed and distributed online to athletes. The survey contained questions regarding currently available resources, changes in weekly training habits, and perceptions of training such as intensity, moti…	Frontiers in Sports and Active Living	2020-12-23	https://doi.org/10.3389/fspor.2020.623068	USA	USA	105	19.9	2020-04-01	2020-06-30	66.05	27	only during	during the pandemic: less or more	self-report	athletes/exercisers	adults	convenience sample		during	yes	yes	sufficient with concerns	yes	sufficient with concerns
Kaygisiz 2020	Determination of exercise habits, physical activity level and anxiety level of postmenopausal women during COVID-19 pandemic	In this study, researchers aimed to determine exercise habits, physical activity (PA) levels and anxiety levels of postmenopausal women (PMw) during the self-quarantine period of the COVID-19 pandemic. 104 PMw (59.00 +/- 6.61 years old) participated in the study. It was found that PMw who had exercise habits before the pandemic period had higher PA levels, and the women with high anxiety levels d…	Health Care for Women International	2020-12-11	https://doi.org/10.1080/07399332.2020.1842878	Turkey	Turkey	104	59	2020-04-23	2020-04-27	65.38		only during	during the pandemic and recollect before (within-subject)	self-report	general population	adults	convenience sample	International Physical Activity Questionnaire	before	yes	yes	sufficient with concerns	sufficient with concerns	yes
AlFagih 2020	Remotely monitored inactivity due to COVID-19 lockdowns. Potential hazard for heart failure patients.	OBJECTIVES: To study the impact of curfews during the COVID-19 pandemic, on the physical activity in patients of heart failure implanted withcardiac implantable electronic devices (CIEDs). METHODS: This was a retrospective single-center study of heart failure patients inserted with remote monitoring (RM)-capable CIED. We analyzed the transmitted data of physical activity and fluid volume status o…	Saudi Medical Journal	2020-11-01	https://doi.org/10.15537/smj.2020.11.25449	Saudi Arabia	Saudi Arabia	82	65	2020-03-12	2020-04-19	69.69	7	before and during	before and during the pandemic (within-subject)	objective measures	patients	adults	convenience sample			yes	sufficient with concerns	sufficient with concerns	sufficient with concerns	sufficient with concerns
Cavallieri 2021	Parkinson's disease patients' needs during the COVID-19 pandemic in a red zone: A framework analysis of open-ended survey questions	Background and purpose During the first phase of the COVID-19 pandemic, a lockdown was imposed in Italy. The aim of this study was to investigate the perceptions, feelings and unmet needs of Parkinson's disease (PD) patients who experienced the 2-month lockdown in a "red zone" in the northern part of Italy during the COVID-19 outbreak. Methods The study had a descriptive design that used a cross-…	European Journal of Neurology	2021-01-18	https://doi.org/10.1111/ene.14745	Italy	Italy	103		2020-05-25	2020-06-10	56.99	115	only during	during the pandemic: less or more	self-report	patients	adults	convenience sample		after	yes	yes	sufficient with concerns	yes	sufficient with concerns
Versloot 2020	Sports participation of patients with haemophilia in the COVID-19 era: The Dutch experience		Haemophilia	2020-11-08	https://doi.org/10.1111/hae.14189	Netherlands	Netherlands	82	23.6	2020-03-12	2020-07-01	57.54	2	before and during	before and during the pandemic (within-subject)	self-report	patients	adults	convenience sample	Modifiable Activities Questionnaire	during	yes	no	sufficient with concerns	sufficient with concerns	no
Sanudo 2020	Objectively-Assessed Physical Activity, Sedentary Behavior, Smartphone Use, and Sleep Patterns Pre- and during-COVID-19 Quarantine in Young Adults from Spain	This study assessed the effects of COVID-19 home confinement on physical activity, sedentary behavior, smartphone use, and sleep patterns. Data was collected in a sample of 20 young adults (mean age +/- SD: 22.6 +/- 3.4 years; 55% males) over seven days pre- and during the COVID-19 lockdown. Objective and subjective physical activity (Accelerometer and the International Physical Activity Question…	Sustainability	2020-07-22	https://doi.org/10.3390/su12155890	Spain	Spain	20	22.6	2020-03-24	2020-04-03	60.31	15	before and during	before and during the pandemic (within-subject)	objective measures	general population	children	convenience sample	International Physical Activity Questionnaire		yes	yes	sufficient with concerns	yes	yes
Fortane 2021	Epidemiology of hand traumas during the COVID-19 confinement period.	INTRODUCTION: hand injuries are a common emergency mainly caused by domestic accidents or sport injuries. During the COVID-19 pandemic confinement period, with a cut off in transportation as well as in occupational and physical activities, we observed a decrease in medical and elective surgical activities but emergency cases of upper limb and hand surgery increased. MATERIALS AND METHODS: we cond…	Injury	2021-02-17	https://doi.org/10.1016/j.injury.2021.02.024	France	France							before and during	before and during the pandemic (between-subject)	injury study	injury patients	adults	defined sample			sufficient with concerns	yes	sufficient with concerns	yes	sufficient with concerns
Naughton 2021	Health behaviour change during the UK COVID-19 lockdown: Findings from the first wave of the C-19 health behaviour and well-being daily tracker study	Objectives To provide baseline cohort descriptives and assess change in health behaviours since the UK COVID-19 lockdown. Design A prospective cohort (N = 1,044) of people recruited online, purposively targeting vulnerable populations. Methods After a baseline survey (April 2020), participants completed 3 months of daily ecological momentary assessments (EMA). Dietary, physical activity, alcohol,…	British Journal of Health Psychology	2021-01-06	https://doi.org/10.1111/bjhp.12500	UK	UK	1044		2020-04-10	2020-05-18	57.39	23	only during	during the pandemic and recollect before (within-subject)	self-report	patients	adults	convenience sample		before	yes	yes	no	no	yes
Castellini 2020	The impact of COVID-19 epidemic on eating disorders: A longitudinal observation of pre versus post psychopathological features in a sample of patients with eating disorders and a group of healthy controls.	OBJECTIVE: the aim of this longitudinal study was to evaluate the impact of COVID-19 epidemic on Eating Disorders (EDs) patients, considering the role of pre-existing vulnerabilities. METHOD: 74 patients with Anorexia Nervosa (AN) or Bulimia Nervosa (BN) and 97 healthy controls (HCs) were evaluated before lockdown (T1) and during lockdown (T2). Patients were also evaluated at the beginning of tre…	The International Journal of Eating Disorders	2020-08-28	https://doi.org/10.1002/eat.23368	Italy	Italy	74	31.74	2020-04-22	2020-05-03	84.29	82	before and during	before and during the pandemic (within-subject)	self-report	patients	adults	convenience sample		after	yes	yes	no	yes	no
Garcia 2020	Brief report: The impact of the COVID-19 pandemic on health behaviors in adolescents with Autism Spectrum Disorder.	BACKGROUND: There is concern that the COVID-19 pandemic may negatively affect health behaviors in youth, especially youth diagnosed with Autism Spectrum Disorder (ASD). OBJECTIVE: The purpose of this paper was to examine changes in physical activity, screen-time, and sleep in adolescents with ASD due to the COVID-19 pandemic. METHODS: Nine adolescents with ASD completed surveys measuring physical…	Disability and Health Journal	2020-12-05	https://doi.org/10.1016/j.dhjo.2020.101021	USA	USA	9	16.87	2020-03-01	2020-04-30	54.18	-4	only during	during the pandemic and recollect before (within-subject)	self-report	patients	children	convenience sample		during	yes	yes	no	sufficient with concerns	yes
Balanzá-Martínez 2021	The assessment of lifestyle changes during the COVID-19 pandemic using a multidimensional scale.	INTRODUCTION: Healthy lifestyles are relevant to several diseases and to maintain individuals' mental health. Exposure to epidemics and confinement have been consistently associated with psychological consequences, but changes on lifestyle behaviours remain under-researched. MATERIALS AND METHODS: An online survey was conducted among the general population living in Spain during the COVID-19 home…	Revista de Psiquiatría y Salud Mental	2020-08-29	https://doi.org/10.1016/j.rpsm.2020.07.003	Spain	Spain	1254	43.11	2020-04-15	2020-04-22	65.38	37	only during	during the pandemic: less or more	self-report	general population	adults	convenience sample		before	yes	yes	no	sufficient with concerns	sufficient with concerns
Keel 2020	Gaining "The Quarantine 15:" Perceived versus observed weight changes in college students in the wake of COVID-19.	OBJECTIVE: Amidst restrictions to reduce the spread of COVID-19, jokes have surfaced regarding weight gain during the pandemic. The current study documents perceived changes since COVID-19 and compares these to observed longitudinal changes in reported weight, BMI, and how college students described their weight from January to April 2020. METHOD: Undergraduates (N = 90; 88% female) completed on-…	The International Journal of Eating Disorders	2020-08-28	https://doi.org/10.1002/eat.23375	USA	USA	90	19.45	2020-04-15	2020-04-24	66.67	41	before and during	before and during the pandemic (within-subject)	self-report	general population	adults	convenience sample		after	sufficient with concerns	yes	no	yes	yes
Wang 2021	Effects of physical activity and sleep quality on well-being: A wrist actigraphy study during the pandemic.	Previous studies identified the effects of daytime activity, sleep quality and ambient light exposure on individual well-being. These factors have been greatly changed as people are required to stay home during the COVID-19 pandemic; thus, it is necessary to verify whether these factors effect well-being during the pandemic. We recruited 70 adults (females: 46; age range: 31-60) during a high inc…	Applied Psychology: Health and Well-Being	2021-02-21	https://doi.org/10.1111/aphw.12255	China	China	70	47.6	2020-02-17	2020-02-27	70.92	26	only during	during the pandemic and recollect before (within-subject)	self-report	general population	adults	convenience sample	Physical Activity Questionnaire	before	yes	yes	no	no	no
Elnaggar 2020	Physical Activity in Adolescents During the Social Distancing Policies of the COVID-19 Pandemic	This study aimed at exploring the gender-specific changes in physical activity level (PAL) and associated factors amid the COVID-19 pandemic and social distancing, among adolescents. Sixty-three healthy adolescents (14-18 years) were assessed at the baseline (before social distancing imposition) for PAL (BL-PAL) and fitness variables; and next at the follow-up (2 months following social distancin…	Asia-Pacific Journal of Public Health	2020-10-03	https://doi.org/10.1177/1010539520963564	Saudi Arabia	Saudi Arabia	63						before and during	before and during the pandemic (within-subject)	self-report	general population	children	convenience sample	Physical Activity Questionnaire		sufficient with concerns	no	no	sufficient with concerns	sufficient with concerns
Flanagan 2021	The Impact of COVID-19 Stay-At-Home Orders on Health Behaviors in Adults.	OBJECTIVE: Stay-at-home orders in response to the coronavirus disease 2019 (COVID-19) pandemic have forced abrupt changes to daily routines. This study assessed lifestyle changes across different BMI classifications in response to the global pandemic. METHODS: The online survey targeting adults was distributed in April 2020 and collected information on dietary behaviors, physical activity, and me…	Obesity	2020-10-11	https://doi.org/10.1002/oby.23066	USA	Multinational	7753	51.2	2020-04-03	2020-05-03			only during	during the pandemic and recollect before (within-subject)	self-report	general population	adults	convenience sample	Nurses Health Study Physical Activity Questionnaire		yes	yes	no	sufficient with concerns	no
Rastogi 2020	Improved glycemic control amongst people with long-standing diabetes during COVID-19 lockdown: a prospective, observational, nested cohort study	Background and aims COVID-19 is likely to affect the lives of individuals with type 2 diabetes. However, the effect of COVID-19 lockdown on physical activity and glycemic control in such individuals is not known. We studied the physical activity and glycemic control during lockdown in comparison to pre-lockdown parameters in individuals with long-standing type 2 diabetes. Methods This prospective…	International Journal of Diabetes in Developing Countries	2020-10-21	https://doi.org/10.1007/s13410-020-00880-x	India	India	422	58					only during	during the pandemic and recollect before (within-subject)	self-report	patients	adults	convenience sample	Global Physical Activity Questionnaire		yes	sufficient with concerns	no	no	no
Richardson 2020	The influence of COVID-19 measures in the United Kingdom on physical activity levels, perceived physical function and mood in older adults: A survey-based observational study	In March 2020, the spreading Coronavirus (COVID-19) prompted the United Kingdom government to introduce a societal shutdown, accompanied by self-isolation and social-distancing measures to reduce virus transmission. In doing so, opportunities for physical activity were likely reduced, potentially causing detrimental effects to older adults. Therefore, the present study investigated the influence …	Journal of Sports Science	2020-11-26	https://doi.org/10.1080/02640414.2020.1850984	UK	UK	117	76	2020-03-21	2020-05-04	57.05	3	only during	during the pandemic and recollect before (within-subject)	self-report	general population	seniors	convenience sample	International Physical Activity Questionnaire	before	yes	yes	no	no	no
Pišot 2020	Maintaining everyday life praxis in the time of COVID-19 pandemic measures (ELP-COVID-19 survey).	BACKGROUND: The extreme social circumstances caused by declared COVID-19 pandemic deeply intervene people's everyday life and should not be neglected but seen through the view of social reality pinpointing the 'ordinary' people. In this article, authors explored basic segments of everyday and their subjective perception to what extent sleeping habits, physical inactivity, physical activity, nutri…	European Journal of Public Health	2020-11-03	https://doi.org/10.1093/eurpub/ckaa157	Slovenia	Multinational	4108	32	2020-04-15	2020-05-03			only during	during the pandemic and recollect before (within-subject)	self-report	general population	adults	convenience sample	Simple Physical Activity Questionnaire		yes	yes	no	sufficient with concerns	no
Đogaš 2020	The effect of COVID-19 lockdown on lifestyle and mood in Croatian general population: a cross-sectional study.	AIM: To investigate the effect of the coronavirus 2019 (COVID-19) lockdown on lifestyle behaviors and mood changes in the Croatian general population. METHODS: During ten days of the COVID-19 lockdown in Croatia, 3027 respondents (70.3% female) from the general population completed an online, self-report questionnaire. Demographic data and data on lifestyle habits and mood changes before and duri…	Croatian Medical Journal	2020-08-31	https://doi.org/10.3325/cmj.2020.61.309	Croatia	Croatia	3027		2020-04-25	2020-05-05	76.28	46	only during	during the pandemic and recollect before (within-subject)	self-report	general population	adults	convenience sample		after	yes	yes	no	sufficient with concerns	sufficient with concerns
Lopez-Bueno 2020	Immediate Impact of the COVID-19 Confinement on Physical Activity Levels in Spanish Adults	Enacted measures to control the spread of COVID-19 disease such as compulsory confinement may influence health behaviors. The present study investigated changes in physical activity (PA) levels during the first days of confinement. Using an online survey, the Spanish population (n = 2042, 54% women, age 35.9 (SD 13.6) years) replied to questions concerning sociodemographic characteristics as well…	Sustainability	2020-07-16	https://doi.org/10.3390/su12145708	Spain	Spain	2042	35.9	2020-03-22	2020-03-29	56.09	13	only during	during the pandemic and recollect before (within-subject)	self-report	general population	adults	convenience sample	Physical Activity Vital Sign Short Form	before	yes	yes	no	yes	no
delaVega 2020	Exercise Addiction During the COVID-19 Pandemic: an International Study Confirming the Need for Considering Passion and Perfectionism	Various levels of lockdown due to COVID-19 limit people's habitual physical activity. Individuals addicted to exercise, health-oriented, and team-exercisers could be the most affected. We examined the COVID-19-related changes in exercise volume in 1079 exercisers from eight Spanish-speaking nations based on exercise addiction categories, primary reasons for exercise, and forms of exercise. The CO…	International Journal of Mental Health and Addiction	2020-12-03	https://doi.org/10.1007/s11469-020-00433-7	Spain	Multinational	1079	32.88	2020-04-06	2020-04-20			only during	during the pandemic and recollect before (within-subject)	self-report	general population	adults	convenience sample			yes	yes	no	yes	yes
delaCamara 2020	Confinement time due to the COVID-19 disease: An opportunity to promote and engage people in regular physical exercise?		Translational Sports Medicine	2020-05-04	https://doi.org/10.1002/tsm2.170	Spain	Spain	721	31.3	2020-04-02	2020-04-07	66.66	24	only during	during the pandemic and recollect before (within-subject)	self-report	general population	adults	convenience sample		before	yes	yes	no	sufficient with concerns	sufficient with concerns
Meira 2020	Anxiety and Leisure-Domain Physical Activity Frequency, Duration, and Intensity During Covid-19 Pandemic	This study investigated relationships between state anxiety and leisure-domain physical activity levels during Covid-19 pandemic. We used frequency, duration, and intensity as key variables of physical activity. Trait anxiety, state anxiety before pandemic, age, gender, and education level were also included in the analysis. Our general hypothesis was that participants who declared doing more phy…	Frontiers in Psychology	2020-12-29	https://doi.org/10.3389/fpsyg.2020.603770	Brazil	Brazil	571	39	2020-06-01				only during	during the pandemic and recollect before (within-subject)	self-report	general population	adults	convenience sample	Surveillance System of Risk and Protective Factors for Chronic Diseases by Telephone Survey		yes	yes	no	yes	no
Girdharwal 2020	COVID-19 Lockdown: A Study on Behavioural Pattern A Systematic Review in DELHI-NCR, India	Objective: To test the Hypothesis. that young people, when expelled from organized activities and restricted to their homes during the COVID-19. Pandemic will show negative patterns in way of life. behaviours. Methods: The example included 500 kids and teenagers with obesity taking an interest in a longitudinal observational examination situated in Delhi-NCR, India. Way of life data including die…	Journal of Complementary Medicine Research	2020-08-01	https://doi.org/10.5455/jcmr.2020.11.01.21	India	India	441	12	2020-03-24	2020-05-30	82.76	19	before and during	before and during the pandemic (within-subject)	self-report	general population	children	convenience sample		during	no	sufficient with concerns	no	no	sufficient with concerns
Huber 2020	Alteration of physical activity during COVID-19 pandemic lockdown in young adults.		Journal of Translational Medicine	2020-11-02	https://doi.org/10.1186/s12967-020-02591-7	Germany	Germany	1980	23.3					only during	during the pandemic and recollect before (within-subject)	objective measures	general population	adults	convenience sample			yes	yes	no	no	no
Pietrobelli 2020	Effects of COVID-19 Lockdown on Lifestyle Behaviors in Children with Obesity Living in Verona, Italy: A Longitudinal Study.	OBJECTIVE: The aim of this study was to test the hypothesis that youths with obesity, when removed from structured school activities and confined to their homes during the coronavirus disease 2019 pandemic, will display unfavorable trends in lifestyle behaviors. METHODS: The sample included 41 children and adolescents with obesity participating in a longitudinal observational study located in Ver…	Obesity	2020-04-30	https://doi.org/10.1002/oby.22861	Italy	Italy	41	13	2020-03-10	2020-03-31	74.15	39	before and during	before and during the pandemic (within-subject)	self-report	patients	children	convenience sample		before	yes	yes	no	sufficient with concerns	no
Constandt 2020	Exercising in Times of Lockdown: An Analysis of the Impact of COVID-19 on Levels and Patterns of Exercise among Adults in Belgium.	Countries all over the world implemented lockdowns to counteract COVID-19. These lockdowns heavily limited people's exercise possibilities. At the same time, experts advocated to remain physically active to prevent future health problems. Based on an online survey, this study examines adults' exercise levels and patterns during the COVID-19 lockdown in Belgium. Ordinal logistic regression analyse…	International Journal of Environmental Research and Public Health	2020-06-10	https://doi.org/10.3390/ijerph17114144	Belgium	Belgium	13515		2020-03-30	2020-04-05	62.82	20	only during	during the pandemic: less or more	self-report	general population	adults	convenience sample		before	yes	yes	no	sufficient with concerns	no
Ferrante 2020	Did social isolation during the SARS-CoV-2 epidemic have an impact on the lifestyles of citizens?	OBJECTIVES: to study the impact of social isolation, related to the SARS-CoV-2 epidemic, on lifestyles in Italy, with particular reference to physical activity, alcohol consumption, smoking, and eating habits. Moreover, to investigate the association between lifestyle changes during the pandemic and sociodemographic characteristics. DESIGN: epidemiological investigation based on a cross-sectional…	Epidemiologia & Prevenzione	2020-12-23	https://doi.org/10.19191/EP20.5-6.S2.137	Italy	Italy	7847	48.6	2020-04-21	2020-06-07	67.69	81	only during	during the pandemic: less or more	self-report	general population	adults	convenience sample		after	yes	yes	no	yes	no
Phillipou 2020	Eating and exercise behaviors in eating disorders and the general population during the COVID-19 pandemic in Australia: Initial results from the COLLATE project.	OBJECTIVE: Emerging evidence suggests that the coronavirus (COVID-19) pandemic may be negatively impacting mental health. The impact on eating and exercise behaviors is, however, currently unknown. This study aimed to identify changes in eating and exercise behaviors in an Australian sample among individuals with an eating disorder, and the general population, amidst the COVID-19 pandemic outbrea…	The International Journal of Eating Disorders	2020-06-01	https://doi.org/10.1002/eat.23317	Australia	Australia	5469	40.62	2020-04-01	2020-04-04	60.58	60	only during	during the pandemic: less or more	self-report	patients	adults	convenience sample		before	yes	yes	no	sufficient with concerns	no
Brown 2020	The Effect of the COVID-19 Pandemic on People with Parkinson's Disease.	BACKGROUND: The effect of the COVID-19 pandemic on people with Parkinson's disease (PD) is poorly understood. OBJECTIVE: To rapidly identify areas of need and improve care in people with PD during the COVID-19 pandemic, we deployed a survey to assess COVID-19 symptoms and the pandemic's effect among those with and without COVID-19. METHODS: People with and without PD participating in the online s…	Parkinson's Disease	2020-10-27	https://doi.org/10.3233/JPD-202249	USA	Multinational	5378		2020-04-23	2020-05-23			only during	during the pandemic and recollect before (within-subject)	self-report	patients	adults	convenience sample			yes	yes	no	yes	no
Yamada 2020	The COVID-19 outbreak limits physical activities and increases sedentary behavior: A possible secondary public health crisis for the elderly.		Journal of Orthopaedic Science	2020-11-01	https://doi.org/10.1016/j.jos.2020.08.004	Japan	Japan	5000		2020-02-01	2020-02-29	21.51	-19	before and during	before and during the pandemic (between-subject)	self-report	general population	adults	convenience sample		before	sufficient with concerns	no	no	no	sufficient with concerns
Constant 2020	Socio-Cognitive Factors Associated With Lifestyle Changes in Response to the COVID-19 Epidemic in the General Population: Results From a Cross-Sectional Study in France	Background The aims of the present study were to assess changes in lifestyles in the general population in response to coronavirus disease 2019 (COVID-19) lockdown and the influence of COVID-19 perceptions, as assessed by the Extended Parallel Process Model (EPPM), on these changes. Methods Data were collected from 4005 individuals through an online survey conducted 3-4 weeks after the nationwide…	Frontiers in Psychology	2020-09-29	https://doi.org/10.3389/fpsyg.2020.579460	France	France	4005		2020-04-08	2020-04-20	68.27	39	only during	during the pandemic: less or more	self-report	general population	adults	convenience sample		before	yes	yes	no	sufficient with concerns	sufficient with concerns
DiRenzo 2020	Eating habits and lifestyle changes during COVID-19 lockdown: an Italian survey.	BACKGROUND: On December 12th 2019, a new coronavirus (SARS-Cov2) emerged in Wuhan, China, sparking a pandemic of acute respiratory syndrome in humans (COVID-19). On the 24th of April 2020, the number of COVID-19 deaths in the world, according to the COVID-Case Tracker by Johns Hopkins University, was 195,313, and the number of COVID-19 confirmed cases was 2,783,512. The COVID-19 pandemic represen…	Journal of Translational Medicine	2020-06-08	https://doi.org/10.1186/s12967-020-02399-5	Italy	Italy	3533	40.03	2020-04-05	2020-04-24	83.59	65	only during	during the pandemic and recollect before (within-subject)	self-report	general population	adults	convenience sample		during	yes	yes	no	sufficient with concerns	sufficient with concerns
Williams 2021	What have we learned about positive changes experienced during COVID-19 lockdown? Evidence of the social patterning of change.	BACKGROUND: Multiple studies have highlighted the negative impact of COVID-19 and its particular effects on vulnerable sub-populations. Complementing this work, here, we report on the social patterning of self-reported positive changes experienced during COVID-19 national lockdown in Scotland. METHODS: The CATALYST study collected data from 3342 adults in Scotland during weeks 9-12 of a national …	PloS one	2021-01-05	https://doi.org/10.1371/journal.pone.0244873	UK	UK	3342		2020-05-20	2020-06-12	59.45	63	only during	during the pandemic: less or more	self-report	general population	adults	convenience sample		before	yes	yes	no	yes	no
Mandelkorn 2021	Escalation of sleep disturbances amid the COVID-19 pandemic: a cross-sectional international study.	STUDY OBJECTIVES: The stress imposed by the COVID-19 pandemic and ensuing social isolation could adversely affect sleep. As sleep problems may persist and hurt health, it is important to identify which populations have experienced changes in sleeping patterns during the pandemic and their extent. METHODS: In Study 1, 3,062 responders from 49 countries accessed the survey website voluntarily betwe…	Journal of Clinical Sleep Medicine	2021-01-01	https://doi.org/10.5664/jcsm.8800	Israel	Multinational	2562	45.18	2020-03-26	2020-04-26			only during	during the pandemic: less or more	self-report	general population	adults	convenience sample			yes	yes	no	yes	yes
Giacalone 2020	Reported Changes in Dietary Habits During the COVID-19 Lockdown in the Danish Population: The Danish COVIDiet Study	This paper focuses on the effect of the COVID-19 lockdown on the dietary habits of adult Danes. Two aspects were specifically considered: 1) reported changes in intake of specific food categories and 2) effect on healthy eating, operationalized as adherence to the Mediterranean diet (MEDAS score). Respondents (N = 2,462) completed a 44-items self-administered online survey designed for the assess…	Frontiers in Nutrition	2020-12-08	https://doi.org/10.3389/fnut.2020.592112	Denmark	Denmark	2462		2020-04-24	2020-05-05	56.41	49	only during	during the pandemic: less or more	self-report	general population	adults	convenience sample		before	sufficient with concerns	yes	no	yes	yes
Kriaucioniene 2020	Associations between Changes in Health Behaviours and Body Weight during the COVID-19 Quarantine in Lithuania: The Lithuanian COVIDiet Study.	The COVID-19 quarantine has caused significant changes in everyday life. This study aimed to evaluate the effect of the quarantine on dietary, physical activity and alcohol consumption habits of Lithuanians and the association between health behaviours and weight changes. An online cross-sectional survey was carried out among individuals older than 18 years in April 2020. The self-administered qu…	Nutrients	2020-10-13	https://doi.org/10.3390/nu12103119	Lithuania	Lithuania	2447		2020-04-14	2020-04-28	68.89	33	only during	during the pandemic: less or more	self-report	general population	adults	convenience sample		after	yes	yes	no	yes	sufficient with concerns
Górnicka 2020	Dietary and Lifestyle Changes During COVID-19 and the Subsequent Lockdowns among Polish Adults: A Cross-Sectional Online Survey PLifeCOVID-19 Study.	The present study aimed to identify patterns of dietary changes during the COVID-19 pandemic and their associations with sociodemographics, body mass index (BMI) before pandemic, and lifestyle changes in Polish adults and to examine the effects of lockdowns on dietary-lifestyle changes. This study used a cross-sectional online survey to collect data. The k-means algorithm was used to determine of…	Nutrients	2020-08-03	https://doi.org/10.3390/nu12082324	Poland	Poland	2381		2020-04-30	2020-05-23	69.87	49	only during	during the pandemic: less or more	self-report	general population	adults	convenience sample		after	yes	yes	no	yes	yes
Feter 2021	Sharp increase in depression and anxiety among Brazilian adults during the COVID-19 pandemic: findings from the PAMPA cohort.	OBJECTIVES: We aimed to compare the prevalence of depression and anxiety symptoms before and during the pandemic and identify factors associated with aggravated mental health symptoms. STUDY DESIGN: Retrospective cohort study. METHODS: We identified the proportion of normal, mild, moderate, and severe symptoms of depression and anxiety before and during the social distancing restrictions in adult…	Public Health	2020-12-31	https://doi.org/10.1016/j.puhe.2020.11.013	Brazil	Brazil	2321		2020-06-22	2020-07-23	74.76	102	only during	during the pandemic and recollect before (within-subject)	self-report	general population	adults	convenience sample		after	yes	yes	no	yes	sufficient with concerns
Feter 2021	Association between physical activity and subjective memory decline triggered by the COVID-19 pandemic: Findings from the PAMPA cohort.	Implementation of social distancing reduced the incidence of coronavirus disease (COVID-19) cases. Nevertheless, this strategy has other undesirable effects such as physical inactivity and psychological distress, which are associated with cognitive impairment. We aimed to examine whether physical activity during social distancing restrictions could reduce the risk of subjective memory decline in …	Preventive Medicine	2021-01-02	https://doi.org/10.1016/j.ypmed.2020.106415	Brazil	Brazil	2314	38.2	2020-06-22	2020-07-23	74.76	102	only during	during the pandemic and recollect before (within-subject)	self-report	general population	adults	convenience sample		after	yes	yes	no	yes	sufficient with concerns
Gallè 2020	Understanding Knowledge and Behaviors Related to CoViD-19 Epidemic in Italian Undergraduate Students: The EPICO Study.	Background: On February 2020, the novel coronavirus (2019-nCoV) epidemic began in Italy. In order to contain the spread of the virus, the Italian government adopted emergency measures nationwide, including closure of schools and universities, workplaces and subsequently lockdown. This survey was carried out among Italian undergraduates to explore their level of knowledge about the epidemic and th…	International Journal of Environmental Research and Public Health	2020-05-16	https://doi.org/10.3390/ijerph17103481	Italy	Italy	2125	22.5	2020-03-16	2020-03-31	75.16	45	only during	during the pandemic: less or more	self-report	general population	adults	convenience sample		before	yes	yes	no	yes	sufficient with concerns
BilginDogan 2021	The Missing STEMIs and Lifestyle Changes During the COVID-19 Pandemic.	ST-elevated myocardial infarction (STEMI) cases are down during the pandemic. This study examined the effects of new lifestyle behaviors on cardiovascular risk factors during the pandemic. An online, self-administered, anonymous questionnaire was filled by 1964 persons from different regions of Turkey, England, France, and Germany. As the main findings in the survey, participants had less daily s…	Asia-Pacific Journal of Public Health	2021-02-25	https://doi.org/10.1177/1010539521996617	Turkey	Multinational	1964		2020-05-04	2020-05-19			only during	during the pandemic and recollect before (within-subject)	self-report	general population	adults	convenience sample			sufficient with concerns	no	no	no	no
Huber 2020	Altered nutrition behavior during COVID-19 pandemic lockdown in young adults	Purpose The COVID-19 pandemic and the implemented lockdown strongly impact on everyone's daily life. Stressful situations are known to alter eating habits and increase the risk for obesity. In our study, we aimed to investigate the effect of the lockdown measures on nutrition behavior among young adults. Methods In this cross-sectional study, we enrolled 1964 voluntary participants from Bavarian …	European Journal of Nutrition	2020-12-01	https://doi.org/10.1007/s00394-020-02435-6	Germany		1957	23.4					only during	during the pandemic: less or more	self-report	general population	adults	convenience sample			yes	yes	no	yes	sufficient with concerns
Costi 2021	Poor Sleep during the First Peak of the SARS-CoV-2 Pandemic: A Cross-Sectional Study.	The restrictions enacted during lockdown to limit the spread of the novel coronavirus (SARS-CoV-2) have led to changes in people's lifestyle habits. In Italy, these restrictions have dramatically changed the way people work and spend their leisure time, also with repercussions on diet and physical activity. An anonymous survey was disseminated via websites and social media to a convenience sample…	International Journal of Environmental Research and Public Health	2021-01-04	https://doi.org/10.3390/ijerph18010306	Italy	Italy	1826		2020-05-04	2020-06-15	59.98	94	only during	during the pandemic: less or more	self-report	general population	adults	convenience sample		after	yes	yes	no	yes	sufficient with concerns
Drywien 2020	The COVID-19 Pandemic Lockdowns and Changes in Body Weight among Polish Women. A Cross-Sectional Online Survey PLifeCOVID-19 Study	There is limited information on the relationships between restrictions linked to COVID-19 and changes in body weight. The aim of the study was to identify the body weight changes and their determinants in the nutritional and socio-demographic context during the COVID-19 pandemic in Polish women. During lockdown in Poland, 34% of women gained weight, while 18% of women reduced weight. As many as 4…	Sustainability	2020-09-20	https://doi.org/10.3390/su12187768	Poland	Poland	1769		2020-04-01	2020-05-31	67.59	20	only during	during the pandemic and recollect before (within-subject)	self-report	general population	adults	convenience sample		during	yes	yes	no	yes	no
BaroneMTU 2020	The impact of COVID-19 on people with diabetes in Brazil.	The present study aims at identifying main barriers faced by people living with diabetes in Brazil during the COVID-19 pandemic. METHODS: In a convenience sampling study, data were collected from 1701 individuals, aged 18 or above; 75.54% female participants; 60.73% T1D and 30.75% T2D, between April 22nd and May 4th, using an anonymous and untraceable survey containing 20 multiple choice question…	Diabetes Research and Clinical Practice	2020-07-02	https://doi.org/10.1016/j.diabres.2020.108304	Brazil	Brazil	1701		2020-04-22	2020-05-04	69.92	41	only during	during the pandemic: less or more	self-report	patients	adults	convenience sample		before	yes	yes	no	yes	no
Karbownik 2020	Health-, medication- and dietary supplement-related behaviors and beliefs relatively unchanged during the COVID-19 pandemic lockdown.	BACKGROUND: The lockdown imposed to counter the coronavirus disease 2019 (COVID-19) pandemic has evoked an unprecedented phenomenon that could affect health behaviors and beliefs. OBJECTIVE: To examine how medication-, dietary supplement- and health-related behaviors, beliefs and other psychological constructs changed in Polish online health service users during the COVID-19 pandemic lockdown. ME…	Research in Social & Administrative Pharmacy : RSAP	2020-11-27	https://doi.org/10.1016/j.sapharm.2020.11.015	Poland	Poland	1560	38.2	2020-03-15	2020-05-25	61.96	3	before and during	before and during the pandemic (between-subject)	self-report	general population	adults	convenience sample		during	sufficient with concerns	yes	no	yes	no
Khader 2020	A cross sectional study reveals severe disruption in glycemic control in people with diabetes during and after lockdown in India.	BACKGROUND AND AIMS: Uncontrolled diabetes has been associated with poorer clinical outcomes in COVID-19. We aimed to evaluate and assess the impact of COVID-19 pandemic on management of diabetes and challenges faced by people with diabetes in India during and after the lockdown phase. METHODS: A cross-sectional study based on an online questionnaire survey was designed. The questions collected s…	Diabetes & Metabolic Syndrome	2020-08-18	https://doi.org/10.1016/j.dsx.2020.08.011	India	India	1510	41.6	2020-06-10	2020-07-15	73.19	97	only during	during the pandemic: less or more	self-report	patients	adults	convenience sample		after	yes	yes	no	yes	sufficient with concerns
Francisco 2020	Psychological Symptoms and Behavioral Changes in Children and Adolescents During the Early Phase of COVID-19 Quarantine in Three European Countries	The coronavirus disease (COVID-19) pandemic forced the home confinement of the majority of population around the world, including a significant number of children and adolescents, for several weeks in 2020. Negative psychological effects have been identified in adults, but research about the impact of this type of social distancing measure on children and adolescents is scarce. The present study …	Frontiers in Psychiatry	2020-12-03	https://doi.org/10.3389/fpsyt.2020.570164	Portugal	Multinational	1480	9.15	2020-03-01				only during	during the pandemic and recollect before (within-subject)	self-report	general population	children	convenience sample			yes	sufficient with concerns	no	yes	yes
Rossinot 2020	Behavioral Changes During COVID-19 Confinement in France: A Web-Based Study.	BACKGROUND: A global pandemic due to COVID-19 emerged in November 2019 and hit France in early March 2020. It not only resulted in a loss of lives, but also in very strict confinement measures. The objective of this study was to understand what the determinants of the changes in participants' behavior and mental state were during the confinement. METHODS: An online survey was launched on 23 April…	International Journal of Environmental Research and Public Health	2020-11-14	https://doi.org/10.3390/ijerph17228444	France	France	1454		2020-04-23	2020-05-07	68.97	54	only during	during the pandemic: less or more	self-report	general population	adults	convenience sample		before	yes	yes	no	no	no
Leiros-Rodriguez 2020	Musculoskeletal Pain and Non-Classroom Teaching in Times of the COVID-19 Pandemic: Analysis of the Impact on Students from Two Spanish Universities	The lockdown, due to the coronavirus, has led to a change in lifestyle and physical activity in Spanish university students. The objective of this study was to analyze the prevalence of musculoskeletal pain and changes in physical activity and self-perceived stress in the student bodies of two Spanish Universities during the lockdown. A cross-sectional study was carried out in a sample of 1198 st…	Journal of Clinical Medicine	2020-12-15	https://doi.org/10.3390/jcm9124053	Spain	Spain	1198	22.8	2020-04-01	2020-05-31	66.22	23	only during	during the pandemic and recollect before (within-subject)	self-report	general population	adults	convenience sample		during	yes	yes	no	yes	sufficient with concerns
Munasinghe 2020	The Impact of Physical Distancing Policies During the COVID-19 Pandemic on Health and Well-Being Among Australian Adolescents.	PURPOSE: Physical distancing policies in the state of New South Wales (Australia) were implemented on March 23, 2020, because of the COVID-19 pandemic. This study investigated changes in physical activity, dietary behaviors, and well-being during the early period of this policy. METHODS: A cohort of young people aged 13-19 years from Sydney (N = 582) were prospectively followed for 22 weeks (Nove…	Journal of Adolescent Health	2020-11-01	https://doi.org/10.1016/j.jadohealth.2020.08.008	Australia	Australia	582	17	2020-03-23	2020-04-19	59.64	51	before and during	before and during the pandemic (within-subject)	objective measures	general population	children	convenience sample	PACE + Adolescent Physical Activity Measure		yes	yes	no	no	no
Orgiles 2020	Immediate Psychological Effects of the COVID-19 Quarantine in Youth From Italy and Spain	The COVID-19 quarantine has affected more than 860 million children and adolescents worldwide, but to date, no study has been developed within Western countries to examine the psychological impact on their lives. The present study aims to examine for the first time the emotional impact of the quarantine on children and adolescents from Italy and Spain, two of the countries most affected by COVID-…	Frontiers in Psychology	2020-11-06	https://doi.org/10.3389/fpsyg.2020.579038	Spain	Multinational	1143	9.08					only during	during the pandemic and recollect before (within-subject)	self-report	general population	children	convenience sample			yes	sufficient with concerns	no	sufficient with concerns	no
Lopez-Gil 2021	Changes in Healthy Behaviors and Meeting 24-h Movement Guidelines in Spanish and Brazilian Preschoolers, Children and Adolescents during the COVID-19 Lockdown.	BACKGROUND: The aim of this study was to assess changes in physical activity, screen time and sleep duration of preschoolers, children and adolescents and the prevalence of meeting the 24-h movement guidelines during the lockdown caused by COVID-19 in a sample from Spain and Brazil. METHODS: A total of 1099 preschoolers, children and adolescents (aged 3-17 years) from Spain (12.1 ± 4.6 years) and…	Children (Basel, Switzerland)	2021-01-26	https://doi.org/10.3390/children8020083	Spain	Multinational	1099	11.47	2020-03-29	2020-04-29			only during	during the pandemic and recollect before (within-subject)	self-report	general population	children	convenience sample			yes	yes	no	yes	sufficient with concerns
Pérez-Rodrigo 2021	Patterns of Change in Dietary Habits and Physical Activity during Lockdown in Spain Due to the COVID-19 Pandemic.	BACKGROUND: Lockdown due to COVID-19 influenced food habits and lifestyles with potential negative health impact. This study aims to identify patterns of change in eating habits and physical activity during COVID-19 lockdown in Spain and to identify associations with sociodemographic factors and usual habits. METHODS: This cross-sectional study included 1155 adults recruited online to answer a 10…	Nutrients	2021-01-21	https://doi.org/10.3390/nu13020300	Spain	Spain	1036		2020-04-21	2020-05-08	65.83	43	only during	during the pandemic and recollect before (within-subject)	self-report	general population	adults	convenience sample	Global Physical Activity Questionnaire	before	yes	yes	no	sufficient with concerns	no
Elsalem 2020	Stress and behavioral changes with remote E-exams during the Covid-19 pandemic: A cross-sectional study among undergraduates of medical sciences	Background: Emergence of coronavirus disease 2019 (COVID-19) forced the worldwide higher educational institutes to adopt distance learning mode. Further, remote electronic exams (E-exams) were considered as mode of assessment. Objectives: This cross-sectional study evaluated the students' experience of remote E-exams during the COVID-19 pandemic among Medical Sciences students in Jordan. Material…	Annals of Medicine and Surgery	2020-11-01	https://doi.org/10.1016/j.amsu.2020.10.058	Jordan	Jordan	1019		2020-08-22	2020-08-31	53.84	160	only during	during the pandemic: less or more	self-report	general population	adults	convenience sample		after	yes	no	no	sufficient with concerns	no
Ozden 2021	The Effect of Social Isolation during COVID-19 Pandemic on Nutrition and Exercise Behaviors of Nursing Students.	This study aims to examine the effect of social isolation during COVID-19 pandemic on nutrition and exercise behaviors of nursing students. This descriptive study was conducted with nursing students of a university in eastern Turkey. The sample of the study consisted of 1,011 nursing students. The data were collected via e-mail using the Questionnaire of Descriptive Characteristics and the Nutrit…	Ecology of Food and Nutrition	2021-01-21	https://doi.org/10.1080/03670244.2021.1875456	Turkey	Turkey	1011	19.97	2020-05-15	2020-05-29	65.38		only during	during the pandemic and recollect before (within-subject)	self-report	general population	adults	convenience sample		before	yes	yes	no	yes	sufficient with concerns
Mutz 2020	Sport and exercise in times of self-quarantine: How Germans changed their behaviour at the beginning of the Covid-19 pandemic	Due to the massive spread of a new Coronavirus (SARS-CoV-2), many European governments enacted rules and legislations in order to reduce social interactions and contain the spread of the virus. German authorities put in force a lockdown of all non-essential infrastructure, starting on 22 March 2020. These policies included the closing of sports clubs, fitness centres and community sports grounds.…	International Review for the Sociology of Sport	2020-06-22	https://doi.org/10.1177/1012690220934335	Germany	Germany	1001		2020-03-27	2020-04-06	60.75	30	only during	during the pandemic and recollect before (within-subject)	self-report	general population	adults	representative		before	yes	yes	no	yes	yes
Cacioppo 2020	Emerging health challenges for children with physical disabilities and their parents during the COVID-19 pandemic: The ECHO French survey.	BACKGROUND: The daily lives of children with physical disabilities and their families have been significantly affected by the COVID-19 pandemic. The children face health risks, especially mental, behavioral, social and physical risks. OBJECTIVE: This study aimed to identify potential healthcare issues relating to the wellbeing of disabled children, continuity of rehabilitation and medical care, a…	Annals of Physical and Rehabilitation Medicine	2020-08-18	https://doi.org/10.1016/j.rehab.2020.08.001	France	France	1000	9.5					only during	during the pandemic: less or more	self-report	patients	children	convenience sample	Enfant Confinement Handicap Besoins		yes	yes	no	sufficient with concerns	no
Dai 2021	Maintaining normal sleep patterns, lifestyles and emotion during the COVID-19 pandemic: The stabilizing effect of daytime napping	This study aimed to assess changes in sleep pattern and their influence on people's daily life and emotion during the COVID-19 pandemic. Self-developed questionnaires were used to measure changes in nocturnal sleep, daytime napping, lifestyles and negative emotions in individuals before and after the COVID-19 pandemic. Nine hundred and thirty effective questionnaires were collected in this study.…	Journal of Sleep Research	2021-01-08	https://doi.org/10.1111/jsr.13259	China	China	930	22.43	2020-03-31	2020-04-30	61.22	69	only during	during the pandemic: less or more	self-report	general population	adults	convenience sample		before	yes	yes	no	yes	sufficient with concerns
Morgul 2020	Psychological effects of the COVID-19 lockdown on children and families in the UK	The implementation of measures (e.g. school closure and social distancing) to contain the spread of COVID-19 by government in numerous countries has affected millions of children and their families worldwide. However, the consequences of such measures on children's wellbeing are not fully understood. The aim of the present study was to examine the psychological impact of the COVID-19 lockdown on …	Revista de Psicologia Clinica con Ninos y Adolescentes	2020-09-03	https://doi.org/10.21134/rpcna.2020.mon.2049	UK	UK	927	7.45	2020-07-14	2020-08-14	61.78	118	only during	during the pandemic and recollect before (within-subject)	self-report	general population	children	convenience sample		after	yes	yes	no	yes	sufficient with concerns
Conroy 2021	The effects of COVID-19 stay-at-home order on sleep, health, and working patterns: a survey study of US health care workers.	STUDY OBJECTIVES: By March 2020, COVID-19 forced much of the world to stay at home to reduce the spread of the disease. Whereas some health care workers transitioned to working from home, many continued to report to work in person as essential employees. We sought to explore changes in sleep, health, work, and mood in health care workers during the stay-at-home orders. METHODS: We developed a cro…	Journal of Clinical Sleep Medicine	2021-02-01	https://doi.org/10.5664/jcsm.8808	USA	USA	834	43	2020-03-28	2020-04-29	65.74	23	only during	during the pandemic: less or more	self-report	general population	adults	convenience sample		during	yes	yes	no	sufficient with concerns	yes
Emerson 2020	Coping with being cooped up: Social distancing during COVID-19 among 60+in the United States	Objectives. This study examined the impact of sheltering in place and social distancing among adults aged 60 and older during the 2020 outbreak of COVID-19 in the United States. Methods. Using convenience sampling respondents were asked to complete a web-administered survey to explore impact of social distancing on loneliness, stress, and behavioral changes. The analytic sample consisted of 833 r…	Revista Panamericana de Salud Publica/Pan American Journal of Public Health	2020-06-29	https://doi.org/10.26633/RPSP.2020.81	USA	USA	833		2020-03-30	2020-04-12	65.02	25	only during	during the pandemic: less or more	self-report	general population	seniors	convenience sample		during	yes	yes	no	yes	sufficient with concerns
Kumar 2021	Impact of home confinement during COVID-19 pandemic on sleep parameters in Parkinson's disease.	BACKGROUND: Literature shows that home confinement during coronavirus disease 2019 (COVID-19) pandemic has significantly affected sleep. However, such information regarding subjects having Parkinson's disease (PD) is unavailable. METHODS: This cross-sectional study was conducted using a questionnaire, developed and validated by experts. PD subjects from nine centers across India were included. Qu…	Sleep Medicine	2020-11-23	https://doi.org/10.1016/j.sleep.2020.11.021	India	India	832		2020-05-25	2020-07-20	73.87	81	only during	during the pandemic and recollect before (within-subject)	self-report	patients	adults	convenience sample		after	yes	sufficient with concerns	no	yes	sufficient with concerns
Palvolgyi 2020	A PRELIMINARY STUDY ON THE EFFECT OF THE COVID-19 PANDEMIC ON SPORTING BEHAVIOR, MINDFULNESS AND WELL-BEING	Background. The COVID-19 pandemic has affected individual well-being negatively; to mitigate the impact, psychological resources are required. Material and methods. Both the WHO WBI-5: 5-item World Health Organization Well Being Index and MAAS: Brown and Ryan (2003) Mindfulness Attention and Awareness Scale were utilized in this study on 827 university students (age 25.29 +/- 8.09). Statistical P…	Health Problems of Civilization	2020-10-09	https://doi.org/10.5114/hpc.2020.97898	Hungary	Hungary	827	25.29	2020-04-01	2020-05-31	61.88	23	only during	during the pandemic and recollect before (within-subject)	self-report	general population	adults	convenience sample		during	sufficient with concerns	sufficient with concerns	no	sufficient with concerns	sufficient with concerns
Tejera-Perez 2021	People living with type 1 diabetes point of view in COVID-19 times (COVIDT1 study): Disease impact, health system pitfalls and lessons for the future.	AIMS: To analyse the effects of confinement among people with type 1 diabetes (T1D) and their caregivers over the course of the COVID-19 crisis and to evaluate contemporary changes in medical assistance and patient preferences. METHODS: An observational cross-sectional study designed as a self-reported web-based survey was conducted over the course of the COVID-19 pandemic. RESULTS: A total of 76…	Diabetes Research and Clinical Practice	2020-12-02	https://doi.org/10.1016/j.diabres.2020.108547	Spain	Spain	769		2020-04-26	2020-05-03	65.38	48	only during	during the pandemic: less or more	self-report	patients	adults	convenience sample		before	yes	sufficient with concerns	no	sufficient with concerns	sufficient with concerns
Gomes 2020	Impact of COVID-19 on clinical practice, income, health and lifestyle behavior of Brazilian urologists.	OBJECTIVES: To evaluate the impact of COVID-19 on clinical practice, income, health and lifestyle behavior of Brazilian urologists during the month of April 2020. MATERIALS AND METHODS: A 39-question, web-based survey was sent to all urologist members of the Brazilian Society of Urology. We assessed socio-demographic, professional, health and behavior parameters. The primary goal was to evaluate …	International Brazilian Journal of Urology	2020-05-06	https://doi.org/10.1590/S1677-5538.IBJU.2020.99.15	Brazil	Brazil	766	46	2020-04-29	2020-05-10	71.8	48	only during	during the pandemic: less or more	self-report	general population	adults	convenience sample		before	yes	sufficient with concerns	no	yes	yes
He 2020	Changes in Body Weight, Physical Activity, and Lifestyle During the Semi-lockdown Period After the Outbreak of COVID-19 in China: An Online Survey.	OBJECTIVES: The outbreak of novel coronavirus (COVID-19) provided an opportunity to undertake an online survey to study the relationships between body weight changes with changes in physical activity and lifestyle during an unusual event of forced isolation, or quarantine. METHODS: We distributed an electronic questionnaire using the popular social application WeChat to adults from any province o…	Disaster Medicine and Public Health Preparedness	2020-07-14	https://doi.org/10.1017/dmp.2020.237	China	China	339	37.6	2020-03-01	2020-03-20	73.4	39	only during	during the pandemic and recollect before (within-subject)	objective measures	general population	adults	convenience sample			yes	sufficient with concerns	no	sufficient with concerns	yes
Simsek 2020	The Title of the Article: Investigation the Effect of Performing Physical Activity at Home on Sleep Quality and Life Satisfaction During Coronavirus (Covid-19) Outbreak	The aim of this study is to investigate the effect of performing physical activity at home during the covid19 outbreak on sleep quality and life satisfaction. A total of 757 people participated in the study voluntarily. The Pittsburgh Sleep Quality Index (PSQI), life satisfaction scale (LSS) and Personal Information Form prepared by the researchers were used for the volunteers involved in the stu…	International Journal of Applied Exercise Physiology	2020-07-01		Turkey	Turkey	757						only during	during the pandemic and recollect before (within-subject)	self-report	general population	adults	convenience sample		before	yes	no	no	no	no
Robinson 2020	Weight-related lifestyle behaviours and the COVID-19 crisis: An online survey study of UK adults during social lockdown	Background: The COVID-19 crisis is likely to have had wide-ranging consequences on lifestyle behaviours and may have affected weight management. The objective of the present study was to examine perceptions of how weight-related lifestyle changed in social lockdown among UK adults compared with before the emergence of the COVID-19 crisis. Methods: As part of an online cross-sectional survey condu…	Obesity Science & Practice	2020-07-24	https://doi.org/10.1002/osp4.442	UK	UK	723	30.7	2020-04-19	2020-04-22	57.69	32	only during	during the pandemic: less or more	self-report	general population	adults	convenience sample		before	yes	yes	no	sufficient with concerns	no
Reyes-Olavarría 2020	Positive and Negative Changes in Food Habits, Physical Activity Patterns, and Weight Status during COVID-19 Confinement: Associated Factors in the Chilean Population.	The association between the changes in lifestyle during coronavirus disease 2019 (COVID-19) confinement and body weight have not been studied deeply. Therefore, the aim of the present study was to determine lifestyle changes, such as eating habits and physical activity (PA) patterns, caused by confinement during the COVID-19 pandemic and to analyze its association with changes in body weight. Sev…	International Journal of Environmental Research and Public Health	2020-07-28	https://doi.org/10.3390/ijerph17155431	Chile	Chile	700	31	2020-05-01	2020-06-30	70.24	46	only during	during the pandemic: less or more	self-report	general population	adults	convenience sample		before	yes	yes	no	no	no
DiCorrado 2020	Effects of social distancing on psychological state and physical activity routines during the COVID-19 pandemic.	Background: The novel coronavirus disease (COVID-19) has affected the entire world. Since the reporting of the first cases, Italy has quickly become the country hit second firmest in the world by the coronavirus. Governments' immediate protective restrictions modified the habit of the individuals and included full lockdowns of cities, travel, restricted social congregations, and suspended schools…	Sport Sciences for Health	2020-09-25	https://doi.org/10.1007/s11332-020-00697-5	Italy	Italy	679	33.35					only during	during the pandemic: less or more	self-report	general population	adults	convenience sample			sufficient with concerns	yes	no	no	no
López-Moreno 2020	Physical and Psychological Effects Related to Food Habits and Lifestyle Changes Derived from Covid-19 Home Confinement in the Spanish Population.	As a consequence of COVID-19, millions of households have suffered mobility restrictions and changes in their lifestyle over several months. The aim of this study is to evaluate the effects of COVID-19 home confinement on the food habits, lifestyle and emotional balance of the Spanish population. This cross-sectional study used data collected via an anonymous online questionnaire during the month…	Nutrients	2020-11-10	https://doi.org/10.3390/nu12113445	Spain	Spain	675	39.1	2020-05-28	2020-06-21	57.02	80	only during	during the pandemic: less or more	self-report	general population	adults	convenience sample		after	yes	yes	no	yes	yes
Shrestha 2020	Changes and Compromises in Health Choices during COVID-19 Lockdown in Kathmandu Valley: A Descriptive Cross-sectional Study	Introduction: Nepal government enforced a lockdown as a social distancing measure to curb the COVID-19 pandemic. The lockdown has led to compromises in day to day choices like food, exercise, sleep, self-care routines and utilization of healthcare facilities directly and indirectly influencing aspects of health. Identification of compromised health choices can assist in better planning of inevita…	Journal of Nepal Medical Association	2020-12-31	https://doi.org/10.31729/jnma.5790	Nepal	Nepal	667		2020-03-30	2020-07-31	74.3	55	only during	during the pandemic: less or more	self-report	general population	adults	convenience sample		before	sufficient with concerns	yes	no	sufficient with concerns	no
Rodriguez-Gonzalez 2020	Psychological, Social and Health-Related Challenges in Spanish Older Adults During the Lockdown of the COVID-19 First Wave	Background: The global pandemic of COVID-19 has required a population lockdown. Spain has one of the oldest/most aging populations in the world and was one of the most affected countries. We aim to describe the psychological and social implications as well as health-related behaviors as a result of the lockdown in community-dwelling older adults. Materials and Methods: Observational cross-section…	Frontiers in Psychiatry	2020-12-03	https://doi.org/10.3389/fpsyt.2020.588949	Spain	Spain	528	69.25	2020-04-20	2020-04-27	65.38	42	only during	during the pandemic: less or more	self-report	general population	seniors	convenience sample		before	yes	yes	no	no	no
Fallon 2020	Adverse effects of COVID-19-related lockdown on pain, physical activity and psychological well-being in people with chronic pain	Countries across the world imposed lockdown restrictions during the COVID-19 pandemic. It has been proposed that lockdown conditions, including social and physical distancing measures, may disproportionately impact those living with chronic pain and require rapid adaptation to treatment and care strategies. Using an online methodology, we investigated how lockdown restrictions in the United Kingd…	British Journal of Pain	2020-11-21	https://doi.org/10.1177/2049463720973703	UK	UK	519	43.98	2020-04-17	2020-05-12	58.15	30	only during	during the pandemic: less or more	self-report	patients	adults	convenience sample		before	yes	yes	no	yes	yes
Schnitzer 2020	COVID-19 stay-at-home order in Tyrol, Austria: sports and exercise behaviour in change?	OBJECTIVES: The aim of the study was to investigate differences in the frequency and types of engagement in sports before, during and after the coronavirus disease 2019 (COVID-19) stay-at-home order in Tyrol, Austria. STUDY DESIGN: A representative population survey was conducted. METHODS: A sample of Tyroleans (N = 511) was questioned by a market research institute via an online questionnaire or…	Public Health	2020-06-26	https://doi.org/10.1016/j.puhe.2020.06.042	Austria	Austria	511		2020-04-27	2020-05-04	65.31	47	only during	during the pandemic and recollect before (within-subject)	self-report	general population	adults	representative	Questionnaire of the Eurobarometer 472 Study	after	yes	sufficient with concerns	no	no	no
Matsungo 2020	Effect of the COVID-19-induced lockdown on nutrition, health and lifestyle patterns among adults in Zimbabwe.	Background: The COVID-19 is a global public health emergency resulting in lockdowns, associated diet and lifestyle changes and constrained public health delivery. Objective: To investigate the impacts of the COVID-19-induced lockdown in Zimbabwe on nutrition, physical activity, alcohol consumption and smoking among Zimbabwean population aged ≥18 years. Methods: A cross-sectional online survey was…	BMJ Nutrition, Prevention & Health	2020-09-12	https://doi.org/10.1136/bmjnph-2020-000124	Zimbabwe	Zimbabwe	507		2020-05-11	2020-05-25	75	49	only during	during the pandemic: less or more	self-report	general population	adults	convenience sample		after	yes	yes	no	sufficient with concerns	no
Cancello 2020	Determinants of the Lifestyle Changes during COVID-19 Pandemic in the Residents of Northern Italy.	BACKGROUND: The confinement recommended during COVID-19 pandemic could affect behavior and health. METHODS: We conducted a self-reported survey in northern Italy to observe the lockdown effects on lifestyle changes and to assess their determinants. Prevalence Odds Ratio and Prevalence Risk Ratio were determined. RESULTS: 490 adults (84% female) completed the survey: 13% and 43% reported improved …	International Journal of Environmental Research and Public Health	2020-08-28	https://doi.org/10.3390/ijerph17176287	Italy	Italy	490		2020-04-15	2020-05-04	83.23	75	only during	during the pandemic: less or more	self-report	general population	adults	convenience sample		after	yes	sufficient with concerns	no	sufficient with concerns	sufficient with concerns
Bartoszek 2020	Mental Well-Being (Depression, Loneliness, Insomnia, Daily Life Fatigue) during COVID-19 Related Home-Confinement-A Study from Poland.	The COVID-19 pandemic is a great threat to both physical and mental health as it may lead to psychological stress connected with an economic crisis, threat of unemployment, or fear of losing family members. Emerging data shows that the general public may be vulnerable to the pandemic-related stress and experience frequently prevalent anxiety. A study involving 471 subjects (85.6% female) was cond…	International Journal of Environmental Research and Public Health	2020-10-12	https://doi.org/10.3390/ijerph17207417	Poland	Poland	471	25.5	2020-04-03	2020-04-17	64.36	22	only during	during the pandemic: less or more	self-report	general population	adults	convenience sample		during	yes	yes	no	sufficient with concerns	sufficient with concerns
Fuentes-Garcia 2020	The Effect of COVID-19 Confinement in Behavioral, Psychological, and Training Patterns of Chess Players	The outbreak of COVID-19 has triggered a pandemic, jeopardizing global health. The sports world is also suffering enormous consequences, such as the suspension of the Olympic Games in Tokyo or, in chess, the cancelation of the World Candidates Tournament 2020. Chess is a sport characterized by high psychophysiological demands derived from long training durations, tournaments, and games, leading t…	Frontiers in Psychology	2020-09-11	https://doi.org/10.3389/fpsyg.2020.01812	Spain	Multinational	450	38.31	2020-03-03	2020-04-14			only during	during the pandemic and recollect before (within-subject)	self-report	general population	adults	convenience sample			yes	yes	no	yes	yes
Ingram 2020	Changes in Diet, Sleep, and Physical Activity Are Associated With Differences in Negative Mood During COVID-19 Lockdown	The United Kingdom and Scottish governments instigated a societal lockdown in response to the COVID-19 pandemic. Subsequently, many experienced substantial lifestyle changes alongside the stresses of potentially catching the virus or experiencing bereavement. Stressful situations and poorer health behaviors (e.g., higher alcohol consumption, unhealthy diet, poorer sleep quality, physical inactivi…	Frontiers in Psychology	2020-12-02	https://doi.org/10.3389/fpsyg.2020.588604	UK		399	32.4					only during	during the pandemic: less or more	self-report	general population	adults	convenience sample			yes	yes	no	yes	yes
Ruissen 2021	Increased stress, weight gain and less exercise in relation to glycemic control in people with type 1 and type 2 diabetes during the COVID-19 pandemic.	INTRODUCTION: Lockdown measures have a profound effect on many aspects of daily life relevant for diabetes self-management. We assessed whether lockdown measures, in the context of the COVID-19 pandemic, differentially affect perceived stress, body weight, exercise and related this to glycemic control in people with type 1 and type 2 diabetes. RESEARCH DESIGN AND METHODS: We performed a short-ter…	BMJ Open Diabetes Research & Care	2021-01-11	https://doi.org/10.1136/bmjdrc-2020-002035	Netherlands	Netherlands	399	54.52	2020-03-15	2020-05-31	58.06	5	only during	during the pandemic: less or more	self-report	patients	adults	convenience sample		during	yes	yes	no	yes	sufficient with concerns
Glenister 2021	Detrimental Health Behaviour Changes among Females Living in Rural Areas during the COVID-19 Pandemic.	Women are predicted to be disproportionately impacted by the COVID-19 pandemic due to increased carer responsibilities, loss of income, worry about the virus and a predominantly female healthcare workforce. Whilst there is emerging evidence that negative mental health impacts associated with the COVID-19 pandemic may be more pronounced for women than men, less attention has focussed on changes to…	International Journal of Environmental Research and Public Health	2021-01-15	https://doi.org/10.3390/ijerph18020722	Australia	Australia	339	44.6	2020-05-29	2020-07-08	55.89	118	only during	during the pandemic: less or more	self-report	general population	adults	convenience sample		before	yes	yes	no	yes	yes
Radtke 2020	Recommended shielding against COVID-19 impacts physical activity levels in adults with cystic fibrosis.	BACKGROUND: Severe acute respiratory syndrome - coronavirus-2 (SARS-CoV-2) has caused a pandemic threatening the life of people with chronic respiratory diseases including cystic fibrosis (CF). This study was designed to investigate health-related aspects of individuals with CF, with and without lung transplantation (LTX), their communication with their specialist healthcare providers during the …	Journal of Cystic Fibrosis	2020-08-28	https://doi.org/10.1016/j.jcf.2020.08.013	Switzerland	Switzerland	327		2020-04-27	2020-05-16	55.74	59	only during	during the pandemic: less or more	self-report	patients	adults	convenience sample		after	yes	sufficient with concerns	no	sufficient with concerns	no
Masi 2021	Impact of the COVID-19 pandemic on the well-being of children with neurodevelopmental disabilities and their parents	Aims: To examine the impact of COVID-19 pandemic on child mental health and socio-emotional and physical well-being (including sleep, diet, exercise, use of electronic media; care giver perceptions of symptoms of child neurodevelopmental disability [NDD] and comorbidities), and care giver mental health and well-being, social support and service use. Methods: An online cross-sectional self-report …	Journal of Paediatrics and Child Health	2021-01-10	https://doi.org/10.1111/jpc.15285	Australia	Australia	302	9.7	2020-05-01	2020-06-15	60.03	90	only during	during the pandemic: less or more	self-report	patients	children	convenience sample		before	yes	yes	no	no	no
Robertson 2021	Exploring changes in body image, eating and exercise during the COVID-19 lockdown: A UK survey.	Early reports suggest that lockdown measures associated with the COVID-19 pandemic (e.g., social distancing) are having adverse consequences for people's mental health, including increases in maladaptive eating habits and body dissatisfaction. Certain groups, such as those with pre-existing mental health difficulties, may be especially at risk. The current study explored perceived changes in eati…	Appetite	2020-12-03	https://doi.org/10.1016/j.appet.2020.105062	UK	UK	264		2020-05-11	2020-06-26	59.85	54	only during	during the pandemic: less or more	self-report	general population	adults	convenience sample		during	yes	sufficient with concerns	no	yes	sufficient with concerns
Matvienko-Sikar 2020	Differences in levels of stress, social support, health behaviours, and stress-reduction strategies for women pregnant before and during the COVID-19 pandemic, and based on phases of pandemic restrictions, in Ireland.	BACKGROUND: The COVID-19 pandemic and related restrictions can adversely impact antenatal maternal well-being and health behaviours. AIM: To examine antenatal stress and stress-reduction strategies, social support, and health behaviours between women pregnant before and during the pandemic in Ireland. METHODS: 210 pregnant women were recruited online and in the antenatal department of a tertiary …	Women and Birth	2020-10-23	https://doi.org/10.1016/j.wombi.2020.10.010	Ireland	Ireland	235	33.67					before and during	before and during the pandemic (between-subject)	self-report	general population	adults	convenience sample	Prenatal Health Behaviours Scale		yes	yes	no	yes	yes
Sciberras 2020	Physical Health, Media Use, and Mental Health in Children and Adolescents With ADHD During the COVID-19 Pandemic in Australia.	OBJECTIVE: To examine the impact of COVID-19 restrictions among children with attention-deficit/hyperactivity disorder (ADHD). METHODS: Parents of 213 Australian children (5-17years) with ADHD completed a survey in May 2020 when COVID-19 restrictions were in place (i.e., requiring citizens to stay at home except for essential reasons). RESULTS: Compared to pre-pandemic, children had less exercise…	Journal of Attention Disorders	2020-12-17	https://doi.org/10.1177/1087054720978549	Australia	Australia	213	11	2020-05-01	2020-05-31	62.01	90	only during	during the pandemic and recollect before (within-subject)	self-report	patients	children	convenience sample	CoRonavIruS Health Impact Survey	before	yes	yes	no	sufficient with concerns	yes
Munekawa 2020	Effect of coronavirus disease 2019 pandemic on the lifestyle and glycemic control in patients with type 2 diabetes: a cross-section and retrospective cohort study.	To investigate the acute effects of the coronavirus disease 2019 (COVID-19) on the lifestyle and metabolic parameters in patients with type 2 diabetes mellites. This cross-sectional and retrospective cohort study induced 203 patients who completed a questionnaire regarding stress levels and lifestyles. Data regarding stress levels, sleep time, exercise, and total diet, snack, and prepared food in…	Endocrine Journal	2020-11-29	https://doi.org/10.1507/endocrj.EJ20-0426	Japan	Japan	203	67.4	2020-04-16	2020-05-01	41.03	56	only during	during the pandemic: less or more	self-report	patients	adults	convenience sample		during	yes	yes	no	yes	yes
Reilly 2021	The perceived impact of COVID-19 and associated restrictions on young people with epilepsy in the UK: Young people and caregiver survey.	PURPOSE: To garner the views of young people with epilepsy and caregivers regarding the impact of COVID-19 and subsequent restrictions in the UK. MEHODS: An online survey was used to explore the views of young people with epilepsy (n = 71) and caregivers (n = 130) in June 2020. It included questions on the impact of the pandemic and associated restrictions on the child's epilepsy and on child and…	Seizure	2021-01-07	https://doi.org/10.1016/j.seizure.2020.12.024	UK	UK	202		2020-05-01	2020-06-30	60	44	only during	during the pandemic: less or more	self-report	patients	adults	convenience sample		during	sufficient with concerns	sufficient with concerns	no	no	no
Cransac-Miet 2021	Impact of COVID-19 lockdown on lifestyle adherence in stay-at-home patients with chronic coronary syndromes: Towards a time bomb.	BACKGROUND: We aimed to evaluate the impact of coronavirus disease 2019 (COVID-19)-related lockdown on adherence to lifestyle and drug regimens in stay-at-home chronic coronary syndromes patients living in urban and rural areas. METHODS: A cross-sectional population-based study was perfomed in patients with chronic coronary syndromes. A sample of 205 patients was randomly drawn from the RICO (Obs…	International Journal of Cardiology	2020-09-01	https://doi.org/10.1016/j.ijcard.2020.08.094	France	France	195	65.5	2020-04-13	2020-04-19	68.27	44	only during	during the pandemic: less or more	self-report	patients	adults	representative		before	yes	yes	no	sufficient with concerns	no
Lippke 2021	Physical Activity, Loneliness, and Meaning of Friendship in Young Individuals - A Mixed-Methods Investigation Prior to and During the COVID-19 Pandemic With Three Cross-Sectional Studies.	Meaningful social interactions and regular physical activity are inversely associated with loneliness. Using a mixed-methods research design employing quantitative and qualitative research approaches, this research aimed to explore loneliness, physical activity, friendship, and experiences relating to the COVID-19 pandemic both prior to and during the pandemic. Quantitative data of (1) n = 363 fi…	Frontiers in Psychology	2021-02-02	https://doi.org/10.3389/fpsyg.2021.617267	Germany	Germany	175	24.22	2020-06-08	2020-06-15	57.21	103	only during	during the pandemic: less or more	self-report	general population	adults	convenience sample		after	yes	sufficient with concerns	no	yes	yes
Kayikcioglu 2020	Impact of the COVID-19 pandemic in patients with a previous history of premature myocardial infarction.	Objectives: The coronavirus-disease-2019 (COVID-19) pandemic has led to the restructuring of health-services to prioritize the treatment of COVID-19. The severe restrictions on daily life affected the management of chronic diseases. Patients with a previous history of premature myocardial infarction (MI) are a vulnerable group requiring frequent and continued medical attention both in the pandemi…	American Journal of Preventive Cardiology	2020-11-18	https://doi.org/10.1016/j.ajpc.2020.100128	Turkey	Turkey	169	47.67	2020-05-15	2020-05-25	65.38		only during	during the pandemic: less or more	self-report	patients	adults	convenience sample		before	yes	yes	no	yes	sufficient with concerns
Kishimoto 2020	Behavioral changes in patients with diabetes during the COVID-19 pandemic	Aims/Introduction Amid the coronavirus disease (COVID-19) pandemic, the Japanese government declared a state of emergency and urged people to stay at home to prevent disease transmission. Herein, we investigated this emergency situation's effect on diabetes patients' lifestyle and glycemic control Materials and methods Diabetes patients who visited our hospital between April 1 and June 13, 2020, …	Diabetology International	2020-09-30	https://doi.org/10.1007/s13340-020-00467-1	Japan	Japan	168	62.1	2020-04-01	2020-06-13	36.82	41	only during	during the pandemic: less or more	self-report	patients	adults	convenience sample		during	yes	yes	no	yes	no
McAuley 2021	COPD in the time of COVID-19: an analysis of acute exacerbations and reported behavioural changes in patients with COPD	Introduction: The impact of the severe acute respiratory syndrome coronavirus 2 (SARS-CoV-2) pandemic and associated "lockdown" measures on acute exacerbations of chronic obstructive pulmonary disease (AECOPD) is unknown. We aimed to evaluate the change in AECOPD treatment frequency during the first 6 weeks of lockdown in the UK compared with 2019 and assess changes in self-reported behaviour and…	ERJ Open Research	2021-01-18	https://doi.org/10.1183/23120541.00718-2020	UK	UK	160	67.3	2020-06-02	2020-07-08	63.41	76	only during	during the pandemic: less or more	self-report	patients	adults	convenience sample		during	yes	yes	no	no	no
Ghosh 2020	Effects of nationwide lockdown during COVID-19 epidemic on lifestyle and other medical issues of patients with type 2 diabetes in north India.	BACKGROUND AND AIMS: During the current pandemic of COVID-19, India is under lockdown which could cause disruption in diet and lifestyle in patients with type 2 diabetes (T2DM). We aimed to study lifestyle changes and other common issues related to treatment in our previously seen and treated patients with T2DM. METHODS: Patients (n, 150) who were regularly following up before lockdown were inter…	Diabetes & Metabolic Syndrome	2020-06-02	https://doi.org/10.1016/j.dsx.2020.05.044	India	India	150		2020-05-10	2020-05-17	78.85	66	only during	during the pandemic: less or more	self-report	patients	adults	convenience sample		after	yes	sufficient with concerns	no	no	no
Brown 2020	Life in lockdown: A telephone survey to investigate the impact of COVID-19 lockdown measures on the lives of older people (≥ 75years).	BACKGROUND: In response to the COVID-19 coronavirus pandemic, the UK government introduced social distancing measures and identified specific populations at high risk from the virus. People ≥70 were deemed "Clinically Vulnerable." Distancing measures were introduced to reduce the risk of contracting COVID-19. However, these may have a negative impact on older people who are vulnerable to social i…	Age and Ageing	2020-11-10	https://doi.org/10.1093/ageing/afaa255	UK	UK	142	82.4	2020-05-14	2020-06-01	55.99	57	only during	during the pandemic: less or more	self-report	general population	seniors	convenience sample		before	yes	sufficient with concerns	no	no	no
Gallego-Gómez 2020	The COVID-19 Pandemic and Its Impact on Homebound Nursing Students.	University students are predisposed to stress, which could be even higher in Nursing students since they are directly related to the COVID-19 pandemic given their health training and area of knowledge. Our purpose was to assess the stress levels of Nursing students before and during lockdown due to the COVID-19 pandemic in Murcia (Spain), its influence on taking an online exam and how it was affe…	International Journal of Environmental Research and Public Health	2020-10-10	https://doi.org/10.3390/ijerph17207383	Spain	Spain	138	20	2020-02-03	2020-03-24	26.65	-35	before and during	before and during the pandemic (within-subject)	self-report	general population	adults	convenience sample		before	yes	yes	no	yes	sufficient with concerns
Slivkoff 2021	First-Year Medical Student Experiences Adjusting to the Immediate Aftermath of COVID-19.	Problem: The COVID-19 pandemic required rapid changes to medical curricula, forcing emergent transition to purely remote learning. At Idaho College of Osteopathic Medicine (ICOM), all in-person sessions were suspended on March 16, 2020. One course affected included the first-year, 4-week Respiratory System course which began on March 9. Methods: On the final day of the course, students were sent …	Medical Science Educator	2021-01-22	https://doi.org/10.1007/s40670-021-01213-1	USA	USA	137	23	2020-04-10	2020-04-15	66.67	36	only during	during the pandemic: less or more	self-report	general population	adults	convenience sample		after	yes	sufficient with concerns	no	sufficient with concerns	no
Chague 2020	Impact of lockdown on patients with congestive heart failure during the coronavirus disease 2019 pandemic	Aims Cardiovascular co-morbidities like congestive heart failure (CHF) alter the course of coronavirus disease 2019. Factors associated with the outbreak and lockdown can exacerbate CHF. Methods and results We analysed the answers of 124 randomly selected CHF outpatients (mean age 71.0 +/- 14.0 years, 60.5% male) interviewed by phone during the sixth and seventh weeks of the lockdown. Most patien…	ESC Heart Failure	2020-09-30	https://doi.org/10.1002/ehf2.13016	France	France	124	71	2020-03-17	2020-03-27	68.27	17	only during	during the pandemic: less or more	self-report	patients	adults	convenience sample		before	yes	yes	no	sufficient with concerns	sufficient with concerns
Kalron 2021	Physical activity behavior in people with multiple sclerosis during the COVID-19 pandemic in Israel: Results of an online survey.	Multiple sclerosis (MS) itself and first-line disease modifying therapies do not increase the risk of contracting COVID-19. However, home isolation is likely to result in a significant decrease in participation in leisure time physical activities and an increase in sedentary behavior. Therefore, using an online cross-sectional survey we examined the impact of the COVID-19 epidemic on physical act…	Multiple Sclerosis and Related Disorders	2020-10-26	https://doi.org/10.1016/j.msard.2020.102603	Israel	Israel	120	43	2020-05-15	2020-06-15	68.57	72	only during	during the pandemic: less or more	self-report	patients	adults	convenience sample		after	yes	sufficient with concerns	no	yes	sufficient with concerns
DelisleNyström 2020	International Study of Movement Behaviors in the Early Years (SUNRISE): Results from SUNRISE Sweden's Pilot and COVID-19 Study.	The International Study of Movement Behaviors in the Early Years (SUNRISE) was initiated in response to the 2019 WHO guidelines for physical activity, sedentary behavior, and sleep in children aged 0-5 years. This Swedish pilot study aimed to: (i) assess the proportion of preschoolers meeting the guidelines, (ii) evaluate the feasibility of the methods for the SUNRISE study, and (iii) assess how …	International Journal of Environmental Research and Public Health	2020-11-16	https://doi.org/10.3390/ijerph17228491	Sweden	Sweden	100	4	2020-05-01	2020-06-30	51.28	50	before and during	before and during the pandemic (within-subject)	objective measures	general population	children	convenience sample			yes	yes	no	sufficient with concerns	sufficient with concerns
Magnavita 2020	Occupational Stress and Mental Health among Anesthetists during the COVID-19 Pandemic.	Anesthetist-intensivists who treat patients with coronavirus disease 19 (COVID-19) are exposed to significant biological and psychosocial risks. Our study investigated the occupational and health conditions of anesthesiologists in a COVID-19 hub hospital in Latium, Italy. Ninety out of a total of 155 eligible workers (59%; male 48%) participated in the cross-sectional survey. Occupational stress …	International Journal of Environmental Research and Public Health	2020-11-08	https://doi.org/10.3390/ijerph17218245	Italy	Italy	90		2020-04-27	2020-05-27	68.29	87	only during	during the pandemic: less or more	self-report	general population	adults	convenience sample		after	yes	yes	no	yes	sufficient with concerns
Zorcec 2020	Pandemic with COVID-19 and Families with Children with Chronic Respiratory Diseases.	COVID-19 pandemic has provoked a huge change in daily functioning in millions of people worldwide. The epidemiological measures in prevention of possible infection have increased the possible risks on the mental and physical health. We have conducted a survey in order to investigate the needs and challenges of families with children with chronic respiratory diseases. In this order, we have create…	Prilozi (Makedonska Akademija na Naukite i Umetnostite. Oddelenie za Medicinski Nauki)	2020-10-02	https://doi.org/10.2478/prilozi-2020-0038	Republic of North Macedonia	Republic of North Macedonia	72	7.3	2020-05-01	2020-07-07			only during	during the pandemic and recollect before (within-subject)	self-report	patients	children	convenience sample			yes	no	no	no	no
Magliah 2020	Managing Type 1 Diabetes among Saudi adults on insulin pump therapy during the COVID-19 lockdown.	BACKGROUND AND AIMS: The coronavirus disease 2019 (COVID-19) pandemic has affected people's lives including patients with type 1 diabetes mellitus (T1DM). We aimed to investigate the impact of the COVID-19 lockdown on psychological status, self-management behaviors, and diabetes care maintenance among Saudi adults with T1DM using insulin pump therapy. METHODS: This cross-sectional study used a we…	Diabetes & Metabolic Syndrome	2020-12-06	https://doi.org/10.1016/j.dsx.2020.12.013	Saudi Arabia	Saudi Arabia	65	30	2020-06-21	2020-06-23	70.51	108	only during	during the pandemic: less or more	self-report	patients	adults	convenience sample		after	yes	yes	no	yes	no
Faro 2021	Physical Activity, Mental Health, and Technology Preferences to Support Cancer Survivors During the COVID-19 Pandemic: Cross-sectional Study.	BACKGROUND: COVID-19 has had significant health-related and behavioral impacts worldwide. Cancer survivors (hereafter referred to as "survivors") are particularly prone to behavioral changes and are encouraged to be more vigilant and observe stricter social distancing measures. OBJECTIVE: We explored (1) changes in physical activity and sedentary behaviors since the onset of COVID-19, along with …	JMIR Cancer	2021-02-03	https://doi.org/10.2196/25317	USA	USA	61	62					only during	during the pandemic: less or more	self-report	patients	adults	convenience sample			yes	yes	no	sufficient with concerns	no
Caruso 2020	Reduction of hypoglycaemia, lifestyle modifications and psychological distress during lockdown following SARS-CoV-2 outbreak in type 1 diabetes	Aims To assess changes in glucose metrics and their association with psychological distress and lifestyle changes in patients with type 1 diabetes (T1D) using flash glucose monitoring (FGM) during lockdown following severe acute respiratory syndrome coronavirus 2 outbreak. Materials and methods Single-centre, observational, retrospective study enrolling T1D patients who attended a remote visit on…	Diabetes/Metabolism Research and Reviews	2020-09-11	https://doi.org/10.1002/dmrr.3404	Italy	Italy	48	42.4	2020-04-01	2020-04-30	82.98	61	only during	during the pandemic: less or more	self-report	patients	adults	convenience sample		during	yes	yes	no	yes	sufficient with concerns
Wu 2021	Glycemic control in type 1 diabetes children and teenagers around lockdown for COVID-19: a continuous glucose monitoring based observational study.	OBJECTIVE: COVID-19 pandemic has urged the authorities to impose rigorous quarantines and brought considerable changes to lifestyles. The impact of these changes on glycemic control has remained unclear, especially the long-term effect. We aimed to investigate the impact of lockdown on glycemic control in type 1 diabetes (T1D) children and adolescents. METHODS: This observational study enrolled T…	Journal of Diabetes Investigation	2021-02-04	https://doi.org/10.1111/jdi.13519	China	China	43	7.45	2020-01-25	2020-02-29	67.98	3	only during	during the pandemic: less or more	self-report	patients	children	convenience sample		before	yes	yes	no	sufficient with concerns	sufficient with concerns
Machado 2020	Impact of COVID-19 lockdown measures on a cohort of eating disorders patients	BackgroundLockdown implemented to prevent the COVID-19 spread resulted in marked changes in the lifestyle. The objective of the current study was to assess the impact of lockdown measures on a cohort of eating disorder (ED) patients being followed as part of an ongoing naturalistic treatment study.MethodsNinety-nine patients aged 18 or older, currently or previously, in treatment at a Portuguese …	Journal of Eating Disorders	2020-11-02	https://doi.org/10.1186/s40337-020-00340-1	Portugal	Portugal	43	27.6	2020-04-30	2020-05-15	68.59	52	only during	during the pandemic: less or more	self-report	patients	adults	convenience sample		during	yes	yes	no	no	no
Creese 2020	Loneliness, physical activity and mental health during Covid-19: a longitudinal analysis of depression and anxiety in adults over 50 between 2015 and 2020.	OBJECTIVE: Loneliness and physical activity are important targets for research into the impact of COVID-19 because they have established links with mental health, could be exacerbated by social distancing policies and are potentially modifiable. In this study we aimed to identify whether loneliness and physical activity were associated with worse mental health during a period of mandatory social …	International Psychogeriatrics	2020-12-17	https://doi.org/10.1017/S1041610220004135	UK	UK	3281	67	2020-05-13	2020-06-08	57.21	56	only during	during the pandemic: less or more	self-report	general population	seniors	convenience sample		before	yes	yes	no	sufficient with concerns	no
Day 2020	The Value of Greenspace Under Pandemic Lockdown	The COVID-19 outbreak resulted in unprecedented restrictions on citizen's freedom of movement as governments moved to institute lockdowns designed to reduce the spread of the virus. While most out-of-home leisure activities were prohibited, in England the lockdown rules allowed for restricted use of outdoor greenspace for the purposes of exercise and recreation. In this paper, we use data recorde…	Environmental and Resource Economics	2020-08-04	https://doi.org/10.1007/s10640-020-00489-y	UK	UK			2020-02-15	2020-06-07	45.04	-32	before and during	before and during the pandemic (between-subject)	objective measures	general population	adults	convenience sample			yes	no	no	yes	yes
Fornili 2021	Psychological distress in the academic population and its association with socio-demographic and lifestyle characteristics during COVID-19 pandemic lockdown: Results from a large multicenter Italian study	Measures implemented in many countries to contain the COVID-19 pandemic resulted in a change in lifestyle with unpredictable consequences on physical and mental health. We aimed at identifying the variables associated with psychological distress during the lockdown between April and May 2020 in the Italian academic population. We conducted a multicenter cross-sectional online survey (IO CONTO 202…	PLoS one	2021-03-10	https://doi.org/10.1371/journal.pone.0248370	Italy	Italy	17074		2020-04-01	2020-05-30	74.34	61	only during	during the pandemic and recollect before (within-subject)	self-report	general population	adults	convenience sample		during	yes	yes	no	no	sufficient with concerns
Feeney 2021	The impact of COVID-19 and social distancing on people with Parkinson’s disease: a survey study	As the COVID-19 pandemic continues to affect the international community, very little is known about its impact on the health and day-to-day activities of people with Parkinson’s disease (PwPD). To better understand the emotional and behavioral consequences of the public health policies implemented to mitigate the spread of SARS-CoV-2 in PwPD, and to explore the factors contributing to accessing …	Parkinson's Disease	2021-01-21	https://doi.org/10.1038/s41531-020-00153-8	USA	USA	1342	71	2020-05-13	2020-06-11	66.67	69	only during	during the pandemic: less or more	self-report	patients	adults	convenience sample		after	yes	yes	no	no	sufficient with concerns
Jurak 2021	A COVID-19 Crisis in Child Physical Fitness: Creating a Barometric Tool of Public Health Engagement for the Republic of Slovenia		Frontiers in Public Health	2021-03-05	https://doi.org/10.3389/fpubh.2021.644235	Slovenia	Slovenia			2020-06-01				before and during	before and during the pandemic (between-subject)	objective measures	general population	children	representative			no	no	no	no	no
Almandoz 2020	Impact of COVID-19 stay-at-home orders on weight-related behaviours among patients with obesity.	How the impact of the COVID-19 stay-at-home orders is influencing physical, mental and financial health among vulnerable populations, including those with obesity is unknown. The aim of the current study was to explore the health implications of COVID-19 among a sample of adults with obesity. A retrospective medical chart review identified patients with obesity from an obesity medicine clinic and…	Clinical Obesity	2020-06-09	https://doi.org/10.1111/cob.12386	USA	USA	123	51.2	2020-04-15	2020-05-31	66.67	41	only during	during the pandemic: less or more	self-report	patients	adults	convenience sample		after	yes	yes		yes
Oliver-Welsh 2021	The hidden dangers of staying home: a London trauma unit experience of lockdown during the COVID-19 virus pandemic	Introduction. The COVID-19 pandemic resulted in reconfiguration of the NHS. Elective services were stopped and trauma services focused on decreasing patient–clinician interactions and managing injuries nonoperatively wherever possible. The everyday life of the general public changed dramatically with the introduction of a national lockdown to prevent the spread of COVID-19. This paper looks at th…	The Annals of the Royal College of Surgeons of England	2021-03-01	https://doi.org/10.1308/rcsann.2020.7066	UK	UK							before and during	before and during the pandemic (between-subject)	injury study	injury patients	adults	defined sample
